# Supplementary material for: Sexual dimorphism during integrative endocrine and immune responses to ionizing radiation in mice
Source: Sci Rep. 2024 Feb 26;14:7334. doi: 10.1038/s41598-023-33629-7 (PMC10897391; doi:10.1038/s41598-023-33629-7)
Supplement: Supplementary file 2 — Supplementary Table 1. [file 41598_2023_33629_MOESM2_ESM.xlsx]

## Sheet: Blood Male (p<0.05)
	baseMean	log2FoldChange	lfcSE	stat	pvalue	padj	symbol
ENSMUSG00000039801	215.276	2.77501	0.282569	9.82062	9.17761e-23	1.25779e-18	Cplane1
ENSMUSG00000030653	69.5638	-9.32486	1.23097	-7.57523	3.58484e-14	2.45651e-10	Pde2a
ENSMUSG00000064368	1290.02	1.28506	0.205527	6.25254	4.03839e-10	1.84487e-06	ND6
ENSMUSG00000021974	397.223	1.94791	0.315744	6.16928	6.86033e-10	2.26486e-06	Fgf9
ENSMUSG00000096764	20.2109	8.00299	1.30346	6.13979	8.2629e-10	2.26486e-06	Slc12a6
ENSMUSG00000075204	149.753	1.62807	0.296659	5.48803	4.06445e-08	9.28389e-05	Olfr1039
ENSMUSG00000078889	16.0119	21.0211	3.91012	5.37608	7.61243e-08	0.000132408	Gm14288
ENSMUSG00000089945	11.1031	7.1552	1.33625	5.35469	8.5705e-08	0.000132408	Pakap
ENSMUSG00000038738	535.686	1.52324	0.285822	5.32935	9.85659e-08	0.000132408	Shank1
ENSMUSG00000111814	265.779	1.97642	0.371493	5.32021	1.03647e-07	0.000132408	NA
ENSMUSG00000070417	180.869	1.77175	0.333308	5.31566	1.06274e-07	0.000132408	Olfr2
ENSMUSG00000116962	123.352	1.95643	0.376591	5.1951	2.04609e-07	0.000233681	NA
ENSMUSG00000115232	9.72986	6.96064	1.35082	5.1529	2.56492e-07	0.000270402	NA
ENSMUSG00000038594	477.198	1.54162	0.312343	4.93566	7.98804e-07	0.000781972	Cep85l
ENSMUSG00000049173	101.324	1.6824	0.343001	4.90494	9.34563e-07	0.000853879	Myoz3
ENSMUSG00000031258	1298.43	1.61459	0.336355	4.80025	1.58468e-06	0.00135738	Xkrx
ENSMUSG00000022790	42.2334	2.0336	0.427306	4.75912	1.94436e-06	0.0015675	Igsf11
ENSMUSG00000083365	304.259	1.96693	0.418738	4.69727	2.63659e-06	0.00200747	NA
ENSMUSG00000055254	197.543	1.61501	0.347823	4.64318	3.43084e-06	0.00247472	Ntrk2
ENSMUSG00000089978	47.952	1.78361	0.386652	4.61296	3.96984e-06	0.00272033	NA
ENSMUSG00000026023	79.2984	1.49278	0.327082	4.56393	5.02048e-06	0.00318941	Cdk15
ENSMUSG00000110297	28.9779	2.30058	0.504533	4.55982	5.11981e-06	0.00318941	NA
ENSMUSG00000092111	116.469	1.5036	0.33067	4.54713	5.43815e-06	0.00324043	Vmn2r113
ENSMUSG00000028859	974.747	-1.20235	0.266432	-4.51279	6.39794e-06	0.00365349	Csf3r
ENSMUSG00000118642	549.889	1.76509	0.397104	4.4449	8.79319e-06	0.00482043	NA
ENSMUSG00000049577	411.585	0.912463	0.208011	4.38662	1.15127e-05	0.00606851	Zfpm1
ENSMUSG00000059974	26.5138	2.24363	0.517535	4.33523	1.45607e-05	0.00739093	Ntm
ENSMUSG00000064137	105.858	1.39668	0.331739	4.21018	2.55165e-05	0.0122895	Rhox8
ENSMUSG00000028333	1728.34	0.818514	0.194669	4.20465	2.61489e-05	0.0122895	Anp32b
ENSMUSG00000084031	20.4705	2.55801	0.609307	4.19822	2.69016e-05	0.0122895	Gm7416
ENSMUSG00000094672	53.8031	1.54085	0.3813	4.04106	5.32103e-05	0.0230429	Vmn2r25
ENSMUSG00000058922	167.989	1.3582	0.336317	4.03846	5.38031e-05	0.0230429	NA
ENSMUSG00000044951	95.053	1.35666	0.339082	4.00098	6.3081e-05	0.0261808	Mylk4
ENSMUSG00000108827	102.268	1.30033	0.325565	3.99406	6.49506e-05	0.0261808	Olfr1310
ENSMUSG00000042082	286.936	0.824828	0.209601	3.93523	8.31177e-05	0.0325465	Arsb
ENSMUSG00000108904	11.3722	3.39627	0.865448	3.92429	8.69861e-05	0.032587	NA
ENSMUSG00000013353	30.3171	1.84772	0.471169	3.92156	8.79766e-05	0.032587	4931406B18Rik
ENSMUSG00000026303	122.941	1.9012	0.487828	3.89728	9.72799e-05	0.0350848	Mlph
ENSMUSG00000021700	27.6418	2.12373	0.547681	3.87768	0.000105458	0.0370591	Rab3c
ENSMUSG00000072739	27.5341	2.65008	0.689161	3.84538	0.000120366	0.0412405	Gm10408
ENSMUSG00000040524	474.208	0.87428	0.228824	3.82076	0.000133043	0.0444721	Zfp609
ENSMUSG00000021578	139.26	0.900834	0.24057	3.74459	0.000180691	0.0589613	Ccdc127
ENSMUSG00000022664	124.176	-1.08263	0.289653	-3.7377	0.000185713	0.0591907	Slc35a5
ENSMUSG00000024729	19.7979	2.02971	0.549843	3.69143	0.000222997	0.0694587	Ms4a20
ENSMUSG00000068015	302.944	-0.905524	0.24721	-3.66297	0.000249307	0.0753997	Lrch1
ENSMUSG00000001496	128.451	1.26988	0.347045	3.65913	0.000253074	0.0753997	Nkx2-1
ENSMUSG00000024451	107.3	-1.01805	0.279872	-3.63754	0.000275256	0.0802635	Arap3
ENSMUSG00000042489	200.323	0.880309	0.242558	3.62926	0.00028423	0.0811536	Clspn
ENSMUSG00000078173	7.17653	-5.03443	1.39574	-3.607	0.000309762	0.0866167	Lenep
ENSMUSG00000020311	690.167	0.692848	0.192622	3.59692	0.000322007	0.0866167	Erlec1
ENSMUSG00000091227	89.8024	1.45208	0.40373	3.59666	0.000322324	0.0866167	NA
ENSMUSG00000042978	286.152	-0.870519	0.242987	-3.58257	0.000340227	0.0896696	Sbk1
ENSMUSG00000026098	131.039	0.96284	0.270252	3.56275	0.000366991	0.0948984	Pms1
ENSMUSG00000107211	4.21524	5.72304	1.61475	3.54423	0.000393762	0.0998244	NA
ENSMUSG00000053007	43482.7	1.04731	0.295977	3.53848	0.000402436	0.0998244	Creb5
ENSMUSG00000001062	75.7917	-1.19129	0.337005	-3.53492	0.000407893	0.0998244	Vps9d1
ENSMUSG00000047898	50.3596	1.61198	0.457872	3.52059	0.000430592	0.102359	Ccr4
ENSMUSG00000037815	615.232	0.768582	0.21841	3.51899	0.000433186	0.102359	Ctnna1
ENSMUSG00000023333	25.0923	1.63397	0.465971	3.5066	0.000453871	0.105429	Gcm1
ENSMUSG00000029245	100.971	1.55465	0.445517	3.48955	0.000483842	0.110518	Epha5
ENSMUSG00000003731	153.903	0.858899	0.246646	3.48231	0.0004971	0.110677	Kpna6
ENSMUSG00000056073	87.0755	1.25833	0.361548	3.48039	0.00050069	0.110677	Grik2
ENSMUSG00000004842	98.6752	1.41712	0.411228	3.44606	0.000568817	0.12374	Pou1f1
ENSMUSG00000059005	1084.74	0.691884	0.202409	3.41825	0.000630246	0.134961	Hnrnpa3
ENSMUSG00000085603	665.272	0.924042	0.274708	3.36373	0.000768978	0.162136	NA
ENSMUSG00000030077	6.33892	4.49993	1.34172	3.35385	0.000796951	0.16406	Chl1
ENSMUSG00000005774	197.579	-0.68692	0.204923	-3.35209	0.000802046	0.16406	Rfx5
ENSMUSG00000061838	81.3983	1.28506	0.384024	3.34629	0.000818995	0.165064	Suclg2
ENSMUSG00000015247	27.643	-1.51194	0.453057	-3.3372	0.000846268	0.168089	Nipsnap3b
ENSMUSG00000001627	173.287	0.889275	0.267101	3.32936	0.000870459	0.170423	Ifrd1
ENSMUSG00000025937	204.659	0.787741	0.239479	3.2894	0.00100401	0.193802	Lactb2
ENSMUSG00000005360	27.1746	1.77897	0.542114	3.28154	0.00103241	0.196517	Slc1a3
ENSMUSG00000095079	42.1466	1.46617	0.451322	3.24861	0.0011597	0.217721	Igha
ENSMUSG00000064360	711.263	-0.584085	0.180395	-3.23781	0.0012045	0.223077	ND3
ENSMUSG00000096719	7.72869	-4.26544	1.33319	-3.19942	0.00137702	0.251628	Mrgpra2b
ENSMUSG00000026914	230.26	0.678105	0.213034	3.18308	0.00145718	0.262772	Psmd14
ENSMUSG00000026082	242.569	0.80795	0.256452	3.15049	0.00162994	0.287761	Rev1
ENSMUSG00000074903	395.896	-0.940428	0.298634	-3.1491	0.00163775	0.287761	NA
ENSMUSG00000025880	168.119	0.755856	0.240548	3.14223	0.00167666	0.290869	Smad7
ENSMUSG00000024525	32.0632	-1.64251	0.524629	-3.1308	0.0017433	0.292423	Impa2
ENSMUSG00000066697	23.6141	1.54246	0.492877	3.12951	0.00175101	0.292423	NA
ENSMUSG00000062609	24.1931	1.77633	0.56766	3.12922	0.00175274	0.292423	Kcnj15
ENSMUSG00000028670	72.4585	-0.981087	0.31383	-3.12617	0.00177096	0.292423	Lypla2
ENSMUSG00000034910	12.7475	2.26564	0.726582	3.11821	0.00181954	0.296866	Pygo1
ENSMUSG00000021687	360.571	0.770028	0.247254	3.11432	0.00184372	0.297273	Scamp1
ENSMUSG00000020521	87.7081	-0.938518	0.302264	-3.10496	0.00190306	0.303273	Rnft1
ENSMUSG00000007827	76.6384	-0.950819	0.307163	-3.09548	0.00196492	0.309531	Ankrd26
ENSMUSG00000079227	145.536	-0.751846	0.243741	-3.08461	0.00203817	0.317422	Ccr5
ENSMUSG00000037410	222.213	-0.888637	0.289351	-3.07113	0.00213247	0.328377	Tbc1d2b
ENSMUSG00000030401	90.8764	0.998653	0.326492	3.05873	0.00222275	0.334978	Rtn2
ENSMUSG00000058488	26.8667	1.62118	0.530838	3.054	0.00225814	0.334978	Kl
ENSMUSG00000042499	9.18282	2.62856	0.862852	3.04636	0.00231632	0.334978	Hoxd11
ENSMUSG00000027168	44.7993	1.34623	0.441992	3.04583	0.00232036	0.334978	Pax6
ENSMUSG00000045031	32.2425	1.31667	0.43229	3.04579	0.0023207	0.334978	Cetn4
ENSMUSG00000024201	141.82	-1.43863	0.472361	-3.04562	0.00232199	0.334978	Kdm4b
ENSMUSG00000020516	901.071	0.640814	0.211623	3.02809	0.00246103	0.348181	Rps6kb1
ENSMUSG00000110841	51.5514	1.34819	0.446023	3.0227	0.00250534	0.348181	Gpx4-ps2
ENSMUSG00000035112	73.7592	1.59862	0.529484	3.01921	0.00253433	0.348181	Wnk4
ENSMUSG00000020532	192.856	0.702742	0.232769	3.01906	0.00253563	0.348181	Acaca
ENSMUSG00000062382	347.917	0.91625	0.303548	3.01847	0.00254054	0.348181	Ftl1-ps2
ENSMUSG00000028465	5298.89	0.641734	0.213141	3.01085	0.00260521	0.353509	Tln1
ENSMUSG00000033720	65.7288	-1.0686	0.358232	-2.98298	0.00285456	0.383546	Sfxn5
ENSMUSG00000060680	5.90884	4.36882	1.46699	2.97808	0.0029006	0.385949	Gm8894
ENSMUSG00000019986	63.5402	1.06345	0.357513	2.97459	0.00293383	0.386617	Ahi1
ENSMUSG00000021411	63.2924	-1.01442	0.341676	-2.96895	0.00298823	0.390036	Pxdc1
ENSMUSG00000038902	220.56	-0.715149	0.241415	-2.96233	0.00305324	0.394761	Pogz
ENSMUSG00000038775	17.6119	-1.59792	0.541514	-2.95084	0.0031691	0.405911	Vill
ENSMUSG00000028550	115.357	0.917414	0.312045	2.94	0.00328208	0.410163	Atg4c
ENSMUSG00000059146	220.973	0.740664	0.251986	2.93931	0.00328947	0.410163	Ntrk3
ENSMUSG00000027360	60.5842	-1.04652	0.35625	-2.93758	0.00330781	0.410163	Hdc
ENSMUSG00000051579	117.172	0.756311	0.257577	2.93626	0.003322	0.410163	Tceal8
ENSMUSG00000044583	210.417	0.8523	0.292053	2.91831	0.00351939	0.430653	Tlr7
ENSMUSG00000073422	87.7738	-0.833881	0.286048	-2.91518	0.00355481	0.431138	H2-Ke6
ENSMUSG00000094588	36.793	1.2403	0.426022	2.91136	0.00359862	0.432624	Olfr898
ENSMUSG00000051687	11.3222	2.10232	0.724423	2.90206	0.00370716	0.441797	Vmn1r73
ENSMUSG00000086564	74.7278	-0.910929	0.315227	-2.88975	0.00385544	0.455507	Cd101
ENSMUSG00000109336	130.909	-0.815479	0.284351	-2.86786	0.00413263	0.484083	Samd4b
ENSMUSG00000042772	565.442	-0.676718	0.23629	-2.86393	0.00418425	0.485976	Smg7
ENSMUSG00000038331	33.9093	1.21456	0.425141	2.85685	0.00427875	0.492607	Satb2
ENSMUSG00000078931	11.0651	-2.11306	0.740307	-2.8543	0.00431323	0.492607	Pdf
ENSMUSG00000096169	13.0984	2.49887	0.878487	2.84451	0.00444793	0.503792	Olfr1564
ENSMUSG00000118193	24.0022	2.37595	0.837049	2.83848	0.00453293	0.505097	NA
ENSMUSG00000022885	523.543	-0.535799	0.188961	-2.8355	0.00457536	0.505097	St6gal1
ENSMUSG00000025616	216.849	0.699273	0.246724	2.83423	0.00459359	0.505097	Usp16
ENSMUSG00000020747	108.751	-0.837255	0.2957	-2.83143	0.00463406	0.505097	Tmem94
ENSMUSG00000031574	48.2442	1.1442	0.404219	2.83065	0.0046453	0.505097	Star
ENSMUSG00000070426	66.1994	0.914845	0.323556	2.82747	0.00469173	0.505097	Rnf121
ENSMUSG00000028617	20.5854	-1.4132	0.500725	-2.82231	0.00476792	0.505097	Lrrc42
ENSMUSG00000003779	40.4958	1.11715	0.395841	2.82223	0.00476914	0.505097	Kif20a
ENSMUSG00000028176	8.91388	2.37561	0.842192	2.82075	0.00479114	0.505097	Lrrc7
ENSMUSG00000020857	42.1423	-1.10129	0.391225	-2.81498	0.00487799	0.510327	Nme2
ENSMUSG00000048142	42.0507	1.88022	0.668932	2.81078	0.00494219	0.513127	Nat8l
ENSMUSG00000030074	171.521	1.23199	0.439738	2.80164	0.00508434	0.521271	Gxylt2
ENSMUSG00000023473	23.3508	-2.696	0.96307	-2.79938	0.00512004	0.521271	Celsr3
ENSMUSG00000029754	49.7834	1.12521	0.402082	2.79846	0.00513474	0.521271	Dlx6
ENSMUSG00000010609	94.8393	-0.835662	0.298981	-2.79503	0.00518947	0.522953	Psen2
ENSMUSG00000036634	4.44076	3.59764	1.29336	2.78163	0.00540868	0.534734	Mag
ENSMUSG00000075289	164.439	-0.670771	0.241174	-2.78127	0.0054147	0.534734	Carns1
ENSMUSG00000003360	187.806	0.735328	0.264435	2.78075	0.00542342	0.534734	Ddx23
ENSMUSG00000061947	9.80121	2.426	0.875286	2.77166	0.00557711	0.54596	Serpina10
ENSMUSG00000026971	18.0831	1.61278	0.5866	2.74937	0.00597092	0.580365	Itgb6
ENSMUSG00000028433	301.079	0.734585	0.26802	2.74079	0.00612924	0.591558	Ubap2
ENSMUSG00000032316	416.53	0.476751	0.174253	2.73598	0.00621956	0.596078	Clk3
ENSMUSG00000062524	184.697	0.644779	0.236524	2.72606	0.00640953	0.610018	Ncr1
ENSMUSG00000030861	171.545	-0.685752	0.252385	-2.71709	0.0065859	0.622481	Acadsb
ENSMUSG00000027649	79.8326	0.798684	0.294352	2.71337	0.00666029	0.625201	Ctnnbl1
ENSMUSG00000027254	29.638	-1.50371	0.554745	-2.71064	0.0067153	0.626077	Map1a
ENSMUSG00000068740	19.197	-1.70088	0.62983	-2.70054	0.00692276	0.641057	Celsr2
ENSMUSG00000118298	30.0477	1.2839	0.476036	2.69706	0.00699555	0.643449	Vmn1r60
ENSMUSG00000101939	114.858	10.525	3.90723	2.69372	0.00706585	0.645583	NA
ENSMUSG00000050931	86.8013	-1.49707	0.556352	-2.69087	0.00712655	0.646817	Sgms2
ENSMUSG00000021376	18.9944	1.46662	0.547829	2.67715	0.00742506	0.668743	Tpmt
ENSMUSG00000009292	267.169	-0.590379	0.220676	-2.67532	0.00746572	0.668743	Trpm2
ENSMUSG00000024413	175.889	-0.67876	0.254187	-2.67031	0.00757803	0.674395	Npc1
ENSMUSG00000027018	60.7924	0.923888	0.346442	2.66679	0.007658	0.677116	Hat1
ENSMUSG00000020723	15.7384	1.77183	0.666968	2.65654	0.00789478	0.693577	Cacng4
ENSMUSG00000021281	160.546	-0.921063	0.347421	-2.65115	0.00802192	0.696634	Tnfaip2
ENSMUSG00000091601	13.8908	2.10764	0.795674	2.64887	0.00807612	0.696634	Olfr93
ENSMUSG00000021945	547.106	-0.491985	0.185751	-2.64862	0.00808207	0.696634	Zmym2
ENSMUSG00000031255	466.036	0.935622	0.353875	2.64394	0.00819482	0.69768	Sytl4
ENSMUSG00000040234	181.771	0.714059	0.270079	2.64389	0.00819602	0.69768	Tm7sf3
ENSMUSG00000045087	92.1768	0.724776	0.27512	2.6344	0.00842865	0.713053	S1pr5
ENSMUSG00000028312	236.593	0.560741	0.213449	2.62704	0.00861303	0.724181	Smc2
ENSMUSG00000044221	92.6674	0.904539	0.3446	2.6249	0.00866752	0.724319	Grsf1
ENSMUSG00000023132	348.66	0.623871	0.237953	2.62183	0.00874602	0.72645	Gzma
ENSMUSG00000030341	166.083	-0.603817	0.230787	-2.61633	0.00888801	0.729503	Tnfrsf1a
ENSMUSG00000029474	79.0315	-0.865217	0.330704	-2.61628	0.00888924	0.729503	Rnf34
ENSMUSG00000093456	6.23877	4.12327	1.5779	2.61313	0.00897179	0.730784	NA
ENSMUSG00000037887	93.9548	-0.959791	0.367676	-2.61043	0.00904295	0.730784	Dusp8
ENSMUSG00000029033	46.424	1.03521	0.396694	2.6096	0.00906481	0.730784	Acap3
ENSMUSG00000118618	51.2295	-1.062	0.407498	-2.60615	0.00915667	0.732438	NA
ENSMUSG00000029461	152.6	-0.743737	0.285523	-2.60482	0.00919222	0.732438	Fam168a
ENSMUSG00000028630	348.796	-0.618651	0.237934	-2.6001	0.00931968	0.738302	Dyrk2
ENSMUSG00000051457	812.337	0.464971	0.179122	2.59583	0.00943635	0.742346	Spn
ENSMUSG00000035299	369.405	0.715015	0.275613	2.59428	0.00947906	0.742346	Mid1
ENSMUSG00000038685	95.1697	-0.88872	0.344449	-2.58012	0.00987649	0.769076	Rtel1
ENSMUSG00000084416	185.8	0.818299	0.318308	2.57078	0.0101471	0.784306	Rpl10a-ps1
ENSMUSG00000041769	110.301	0.626596	0.243866	2.56943	0.0101865	0.784306	Ppp2r2d
ENSMUSG00000032915	291.571	0.609933	0.23888	2.5533	0.0106707	0.814229	Adgre4
ENSMUSG00000032355	14.8897	1.67779	0.6573	2.55254	0.010694	0.814229	Mlip
ENSMUSG00000029148	177.769	-0.581172	0.227915	-2.54995	0.010774	0.815787	Nrbp1
ENSMUSG00000028420	41586.3	4.27539	1.67854	2.5471	0.0108624	0.817961	Tmem38b
ENSMUSG00000041329	11.3013	1.65389	0.650062	2.5442	0.0109528	0.82026	Atp1b2
ENSMUSG00000030680	18.2598	-1.62734	0.641811	-2.53555	0.0112272	0.835415	NA
ENSMUSG00000002413	396.263	-0.492103	0.1942	-2.534	0.011277	0.835415	Braf
ENSMUSG00000035325	249.79	-0.524069	0.207059	-2.53102	0.0113732	0.838009	Sec31a
ENSMUSG00000067430	19.8813	-1.26443	0.500909	-2.52427	0.011594	0.849713	Zfp763
ENSMUSG00000094822	25.7083	1.19563	0.474256	2.52107	0.0116999	0.850281	Olfr243
ENSMUSG00000074934	22.2864	1.59347	0.632258	2.52029	0.0117259	0.850281	Grem1
ENSMUSG00000040867	5.70418	-2.78916	1.1122	-2.50779	0.0121488	0.870857	Begain
ENSMUSG00000022960	111.095	-0.661923	0.264071	-2.50661	0.0121897	0.870857	Donson
ENSMUSG00000025531	147.813	-0.630771	0.251808	-2.50497	0.0122462	0.870857	Chm
ENSMUSG00000020681	704.497	0.459932	0.18372	2.50345	0.012299	0.870857	Ace
ENSMUSG00000028164	75.0249	-0.746385	0.29824	-2.50263	0.0123274	0.870857	Manba
ENSMUSG00000051111	19.1956	1.32488	0.530303	2.49834	0.0124777	0.87485	Sv2c
ENSMUSG00000057530	86.9151	-1.06874	0.427946	-2.49738	0.0125115	0.87485	Ece1
ENSMUSG00000024357	25.0064	-1.15234	0.463063	-2.48851	0.012828	0.878031	Sil1
ENSMUSG00000034101	56.6219	1.03586	0.416506	2.48703	0.0128815	0.878031	Ctnnd1
ENSMUSG00000039313	16.2085	1.63367	0.656881	2.48702	0.012882	0.878031	Minar1
ENSMUSG00000113633	3.97982	3.61961	1.45592	2.48614	0.0129137	0.878031	NA
ENSMUSG00000016181	85.5873	-0.893402	0.359642	-2.48414	0.0129864	0.878031	Utp25
ENSMUSG00000060445	31.3306	-1.2137	0.488709	-2.48349	0.0130103	0.878031	Sycp2
ENSMUSG00000025491	46.6579	-1.00847	0.406403	-2.48145	0.013085	0.878031	Ifitm1
ENSMUSG00000046223	94.7019	-0.688276	0.277893	-2.47676	0.0132581	0.878031	Plaur
ENSMUSG00000032691	82.2995	-0.704452	0.284839	-2.47316	0.0133924	0.878031	Nlrp3
ENSMUSG00000022142	157.64	-0.607335	0.245694	-2.47191	0.0134392	0.878031	Nup155
ENSMUSG00000022257	3.78043	-4.03483	1.63352	-2.47002	0.0135105	0.878031	Laptm4b
ENSMUSG00000038729	45.4361	-1.20605	0.488894	-2.46689	0.0136293	0.878031	Pakap
ENSMUSG00000000934	13.6006	1.48969	0.604082	2.46603	0.0136619	0.878031	Top1mt
ENSMUSG00000015970	9.37528	2.50245	1.01527	2.46483	0.0137079	0.878031	Chdh
ENSMUSG00000029672	202.205	0.546065	0.221547	2.46478	0.0137098	0.878031	Fam3c
ENSMUSG00000044667	8.71191	2.03125	0.824522	2.46355	0.0137568	0.878031	Plppr4
ENSMUSG00000049130	80.1569	-0.753314	0.305861	-2.46293	0.0137808	0.878031	C5ar1
ENSMUSG00000036553	55.7961	-1.10935	0.450594	-2.46199	0.013817	0.878031	Sh3tc1
ENSMUSG00000002266	13.2888	1.60069	0.650861	2.45934	0.0139192	0.878031	Zim1
ENSMUSG00000024350	48.18	-1.00235	0.407582	-2.45925	0.0139228	0.878031	Dnajc18
ENSMUSG00000022749	188.702	-0.58676	0.238606	-2.45912	0.013928	0.878031	Tbc1d23
ENSMUSG00000034928	524.536	-0.45071	0.183355	-2.45812	0.0139665	0.878031	Rnf44
ENSMUSG00000025330	49.1542	-0.850925	0.346512	-2.45569	0.0140615	0.879966	Padi4
ENSMUSG00000086598	7.58379	2.11373	0.864069	2.44625	0.014435	0.899152	Btbd18
ENSMUSG00000091620	61.3709	0.937092	0.383543	2.44325	0.0145555	0.899152	Vmn2r23
ENSMUSG00000034801	299.145	-0.511714	0.209527	-2.44224	0.0145965	0.899152	Sos2
ENSMUSG00000026269	188.897	-0.661618	0.271	-2.4414	0.0146305	0.899152	Rnpepl1
ENSMUSG00000070425	9.44797	-2.55522	1.04978	-2.43406	0.0149305	0.910596	Xntrpc
ENSMUSG00000011751	6.03381	2.99075	1.22894	2.4336	0.0149496	0.910596	Sptbn4
ENSMUSG00000031373	87.1132	0.693229	0.285155	2.43106	0.0150546	0.912935	Car5b
ENSMUSG00000031605	111.381	-0.785821	0.323938	-2.42584	0.0152729	0.922095	Klhl2
ENSMUSG00000042063	150.542	-0.581354	0.239885	-2.42347	0.0153729	0.923392	Zfp386
ENSMUSG00000016028	60.4406	1.18572	0.489534	2.42215	0.0154292	0.923392	Celsr1
ENSMUSG00000112023	254.709	-0.620553	0.256422	-2.42005	0.0155184	0.924694	Lilrb4b
ENSMUSG00000062580	86.7715	0.931594	0.386316	2.41148	0.0158878	0.942605	Timm17a
ENSMUSG00000052906	58.738	0.786107	0.326519	2.40754	0.0160603	0.945007	Ubxn8
ENSMUSG00000022394	53.243	-0.898246	0.373131	-2.40732	0.01607	0.945007	L3mbtl2
ENSMUSG00000042097	5.65968	-2.68634	1.11659	-2.40584	0.0161351	0.945007	Zfp239
ENSMUSG00000051506	1122.2	-0.41638	0.173372	-2.40165	0.0163213	0.951845	Wdfy4
ENSMUSG00000007646	66.6697	0.820627	0.342277	2.39755	0.0165049	0.958476	Rad51c
ENSMUSG00000024180	50.2562	-0.829834	0.347374	-2.38888	0.0168999	0.977272	Pgap6
ENSMUSG00000029049	6.9695	2.13793	0.895827	2.38654	0.0170076	0.977557	Morn1
ENSMUSG00000089715	105.74	-0.859871	0.360729	-2.3837	0.0171395	0.977557	Cbx6
ENSMUSG00000048490	488.102	0.569086	0.238795	2.38316	0.0171648	0.977557	Nrip1
ENSMUSG00000038705	111.34	-0.602502	0.253043	-2.38103	0.0172644	0.977557	Gmeb2
ENSMUSG00000028902	86.6308	0.653973	0.274757	2.38019	0.0173036	0.977557	Sf3a3
ENSMUSG00000074785	195.436	-0.491874	0.206707	-2.37957	0.0173328	0.977557	Plxnc1
ENSMUSG00000024330	24.1621	-1.6034	0.67449	-2.3772	0.0174445	0.978282	Col11a2
ENSMUSG00000083316	18.561	1.29739	0.546049	2.37595	0.0175037	0.978282	NA
ENSMUSG00000117679	69.3449	1.16294	0.489877	2.37394	0.0175996	0.978282	Apbb3
ENSMUSG00000020115	313.844	0.467024	0.196836	2.37265	0.0176608	0.978282	Tbk1
ENSMUSG00000030036	58.1583	0.918591	0.3873	2.37178	0.0177026	0.978282	Mogs
ENSMUSG00000068184	20.5507	1.42212	0.601109	2.36583	0.0179898	0.985137	Ndufaf2
ENSMUSG00000042190	47.976	0.922582	0.390076	2.36513	0.0180235	0.985137	Cmklr1
ENSMUSG00000032512	274.63	-0.51588	0.218154	-2.36475	0.0180423	0.985137	Wdr48
ENSMUSG00000042104	199.789	0.688744	0.291644	2.36159	0.0181967	0.989627	Uggt2
ENSMUSG00000045954	1385.75	0.684081	0.29019	2.35735	0.0184058	0.99408	Cavin2
ENSMUSG00000033857	13.1132	1.77841	0.754795	2.35614	0.0184657	0.99408	Engase
ENSMUSG00000029253	486.125	0.458568	0.194712	2.3551	0.0185175	0.99408	Cenpc1
ENSMUSG00000060279	202.643	0.596046	0.253197	2.35408	0.0185687	0.99408	Ap2a1
ENSMUSG00000003923	112.443	0.631866	0.269045	2.34855	0.0188466	0.999757	Tfam
ENSMUSG00000031176	525.592	0.690426	0.294325	2.34579	0.0189867	0.999757	Dynlt3
ENSMUSG00000024597	114.903	0.684789	0.292204	2.34353	0.0191021	0.999757	Slc12a2
ENSMUSG00000032012	55.3868	0.742626	0.316933	2.34316	0.019121	0.999757	Nectin1
ENSMUSG00000020898	63.0917	-0.762125	0.326065	-2.33734	0.0194215	0.999757	Ctc1
ENSMUSG00000030533	324.488	0.580025	0.248432	2.33475	0.0195567	0.999757	Unc45a
ENSMUSG00000040010	1434.46	-0.574556	0.246155	-2.33413	0.0195891	0.999757	Slc7a5
ENSMUSG00000029184	41.0784	1.3475	0.57731	2.33411	0.0195901	0.999757	Olfr109
ENSMUSG00000113285	17.6679	2.05958	0.884118	2.32953	0.0198308	0.999757	NA
ENSMUSG00000029571	253.394	0.622651	0.267761	2.3254	0.0200505	0.999757	Tmem106b
ENSMUSG00000048763	5.36305	-2.35292	1.01265	-2.32353	0.0201508	0.999757	Hoxb3
ENSMUSG00000109597	44.4403	1.34223	0.578784	2.31905	0.0203923	0.999757	NA
ENSMUSG00000026687	102.81	0.661778	0.285689	2.31643	0.0205346	0.999757	Aldh9a1
ENSMUSG00000092032	244.94	-0.474707	0.20494	-2.31632	0.0205407	0.999757	Vmn2r59
ENSMUSG00000049800	196.708	0.52941	0.228822	2.31364	0.0206877	0.999757	Sertad2
ENSMUSG00000052760	215.132	-0.568598	0.245798	-2.31327	0.0207077	0.999757	A630001G21Rik
ENSMUSG00000019577	13.2006	1.6882	0.73007	2.31238	0.0207567	0.999757	Pdk4
ENSMUSG00000004151	211.213	0.962057	0.417365	2.30508	0.0211623	0.999757	Etv1
ENSMUSG00000027340	77.8369	-0.67809	0.294467	-2.30277	0.0212917	0.999757	Slc23a2
ENSMUSG00000018476	320.208	-0.463716	0.201385	-2.30263	0.0212995	0.999757	Kdm6b
ENSMUSG00000033545	189.235	-0.505409	0.219965	-2.29768	0.0215797	0.999757	Znrf1
ENSMUSG00000028603	315.982	0.510333	0.222236	2.29635	0.0216558	0.999757	Scp2
ENSMUSG00000062515	22.393	1.26158	0.549403	2.29627	0.0216605	0.999757	Fabp4
ENSMUSG00000020265	106.905	-0.62308	0.272088	-2.29	0.0220214	0.999757	Sumo3
ENSMUSG00000110206	128.348	-0.540544	0.236141	-2.28907	0.0220752	0.999757	Flt3l
ENSMUSG00000089847	79.4342	-0.655299	0.28667	-2.2859	0.0222599	0.999757	Timm10b
ENSMUSG00000002835	96.525	1.19212	0.523077	2.27905	0.0226641	0.999757	Chaf1a
ENSMUSG00000026791	8.82434	-2.05245	0.901203	-2.27746	0.0227589	0.999757	Slc2a8
ENSMUSG00000004609	325.115	-0.743666	0.326567	-2.27722	0.022773	0.999757	Cd33
ENSMUSG00000005268	3.4704	-3.5533	1.56102	-2.27627	0.0228301	0.999757	Prlr
ENSMUSG00000093803	93.925	-0.780111	0.342874	-2.27521	0.0228932	0.999757	Ppp2r3d
ENSMUSG00000045328	293.353	0.554973	0.244228	2.27235	0.0230652	0.999757	Cenpe
ENSMUSG00000021374	640.88	-0.401983	0.177244	-2.26797	0.0233313	0.999757	Nup153
ENSMUSG00000041258	588.096	0.852543	0.376207	2.26616	0.0234418	0.999757	Zfp236
ENSMUSG00000025473	70.631	-0.776912	0.342873	-2.26589	0.0234581	0.999757	Adam8
ENSMUSG00000026417	18.1747	1.15557	0.51066	2.2629	0.0236418	0.999757	Pigr
ENSMUSG00000037386	6.41053	2.76853	1.22365	2.26251	0.0236658	0.999757	Rims2
ENSMUSG00000051682	123.337	0.677006	0.299661	2.25924	0.0238685	0.999757	Treml4
ENSMUSG00000026639	56.3171	0.971193	0.430575	2.25557	0.0240973	0.999757	Lamb3
ENSMUSG00000045098	562.548	0.444304	0.19705	2.25478	0.0241472	0.999757	Kmt5b
ENSMUSG00000039137	68.3988	-0.76535	0.33946	-2.25461	0.0241578	0.999757	Whrn
ENSMUSG00000094778	16.4839	1.42848	0.633852	2.25366	0.0242179	0.999757	Olfr143
ENSMUSG00000030802	67.7077	0.693278	0.307809	2.2523	0.0243033	0.999757	Bckdk
ENSMUSG00000024654	50.741	-0.841127	0.373956	-2.24927	0.0244954	0.999757	Asrgl1
ENSMUSG00000032216	462.094	0.481971	0.21458	2.24611	0.024697	0.999757	Nedd4
ENSMUSG00000020048	851.056	0.436741	0.194476	2.24574	0.0247208	0.999757	Hsp90b1
ENSMUSG00000025427	18.7691	1.38577	0.617799	2.24308	0.0248918	0.999757	Rnf165
ENSMUSG00000055240	177.947	0.626667	0.27947	2.24234	0.0249394	0.999757	Zfp101
ENSMUSG00000113388	607.256	-0.493174	0.220091	-2.24077	0.0250408	0.999757	NA
ENSMUSG00000074476	856.604	0.586548	0.261897	2.23961	0.025116	0.999757	Spc24
ENSMUSG00000031216	23.9053	-1.37549	0.614297	-2.23914	0.0251471	0.999757	Stard8
ENSMUSG00000001052	317.999	-0.443482	0.1982	-2.23754	0.025251	0.999757	Sec24b
ENSMUSG00000027490	61.522	1.00883	0.451145	2.23616	0.0253412	0.999757	E2f1
ENSMUSG00000049106	172.36	-0.604492	0.270424	-2.23535	0.0253943	0.999757	Dcaf5
ENSMUSG00000001419	728.836	-0.528964	0.236637	-2.23534	0.025395	0.999757	Mef2d
ENSMUSG00000074359	165.548	0.77341	0.346017	2.23518	0.0254055	0.999757	Psg23
ENSMUSG00000028613	35.4141	0.933956	0.418803	2.23006	0.0257436	0.999757	Lrp8
ENSMUSG00000029207	46.4161	1.03901	0.466218	2.2286	0.0258406	0.999757	Apbb2
ENSMUSG00000027244	106.11	-0.721231	0.323724	-2.22792	0.025886	0.999757	Atg13
ENSMUSG00000060419	234.575	-0.526114	0.236201	-2.2274	0.0259208	0.999757	NA
ENSMUSG00000047694	139.719	-0.53724	0.241508	-2.22453	0.0261131	0.999757	Yipf6
ENSMUSG00000018906	27.1279	1.07688	0.484823	2.22118	0.0263386	0.999757	P4ha2
ENSMUSG00000014837	77.9811	0.862525	0.388339	2.22106	0.0263468	0.999757	4931428F04Rik
ENSMUSG00000029603	167.785	-0.597438	0.269047	-2.22057	0.0263801	0.999757	Dtx1
ENSMUSG00000040327	36.3103	-0.904082	0.407384	-2.21924	0.0264706	0.999757	Cul9
ENSMUSG00000024896	76.112	0.699842	0.315549	2.21786	0.0265645	0.999757	Minpp1
ENSMUSG00000038335	65.5535	0.687225	0.310409	2.21394	0.026833	0.999757	Tsr1
ENSMUSG00000043267	188.982	-0.56984	0.25798	-2.20885	0.0271851	0.999757	Olfr1031
ENSMUSG00000021221	116.034	0.629642	0.285311	2.20686	0.0273235	0.999757	Dpf3
ENSMUSG00000022151	228.445	0.455551	0.206454	2.20654	0.027346	0.999757	Ttc33
ENSMUSG00000075225	9.23694	2.641	1.19826	2.20402	0.0275227	0.999757	Ccdc162
ENSMUSG00000040907	271.472	-0.58298	0.26467	-2.20266	0.0276184	0.999757	Atp1a3
ENSMUSG00000028232	85.3617	0.607789	0.275954	2.2025	0.0276301	0.999757	Tmem68
ENSMUSG00000021719	7.67559	1.94363	0.883255	2.20054	0.0277688	0.999757	Rgs7bp
ENSMUSG00000035184	7.60753	2.39538	1.08879	2.20003	0.0278047	0.999757	Fam124a
ENSMUSG00000007617	147.134	0.550969	0.250941	2.19561	0.0281197	0.999757	Homer1
ENSMUSG00000058558	449.937	0.409304	0.186713	2.19215	0.0283685	0.999757	Rpl5
ENSMUSG00000079884	29.2155	8.54959	3.9086	2.18738	0.0287148	0.999757	NA
ENSMUSG00000023806	289.72	-0.55753	0.255216	-2.18454	0.0289227	0.999757	Rsph3b
ENSMUSG00000057564	4.39526	2.72082	1.24671	2.18239	0.0290805	0.999757	Olfr1508
ENSMUSG00000040093	97.4332	-0.633436	0.290308	-2.18195	0.0291133	0.999757	Bmf
ENSMUSG00000078817	106.06	-0.770725	0.353546	-2.17998	0.0292586	0.999757	Nlrp12
ENSMUSG00000110189	130.931	0.991613	0.455871	2.1752	0.0296148	0.999757	NA
ENSMUSG00000024991	1864.25	0.428189	0.197002	2.17353	0.0297406	0.999757	Eif3a
ENSMUSG00000031791	7.78188	-1.74931	0.805203	-2.1725	0.0298178	0.999757	Tmem38a
ENSMUSG00000017210	96.7625	-0.748898	0.344847	-2.17168	0.0298795	0.999757	Med24
ENSMUSG00000062075	28.196	0.970543	0.447722	2.16774	0.0301788	0.999757	Lmnb2
ENSMUSG00000021773	12.5402	-1.45102	0.669539	-2.16719	0.0302207	0.999757	Comtd1
ENSMUSG00000025986	81.1187	-0.825137	0.380945	-2.16603	0.0303092	0.999757	Slc39a10
ENSMUSG00000083012	9913.81	0.55285	0.255323	2.1653	0.0303646	0.999757	Fam220a
ENSMUSG00000069808	6.47918	-1.94717	0.899882	-2.1638	0.0304794	0.999757	Tlcd3a
ENSMUSG00000003131	211.504	0.551577	0.255	2.16305	0.0305374	0.999757	Pafah1b2
ENSMUSG00000039456	6134.41	0.424287	0.196169	2.16287	0.0305514	0.999757	Morc3
ENSMUSG00000025495	141.788	0.638849	0.295592	2.16126	0.0306756	0.999757	Ptdss2
ENSMUSG00000082277	12.5294	1.57986	0.73164	2.15935	0.0308231	0.999757	NA
ENSMUSG00000031683	371.876	0.479202	0.221955	2.159	0.0308499	0.999757	Lsm6
ENSMUSG00000075383	52.188	-0.753936	0.349496	-2.15721	0.0309893	0.999757	Olfr351
ENSMUSG00000069170	49.3985	0.852971	0.395855	2.15476	0.0311808	0.999757	Adgrv1
ENSMUSG00000052889	846.102	-0.398833	0.185264	-2.15278	0.0313361	0.999757	Prkcb
ENSMUSG00000062604	425.796	-0.565045	0.262553	-2.15212	0.0313879	0.999757	Srpk2
ENSMUSG00000020841	190.918	-0.493382	0.229513	-2.14969	0.0315794	0.999757	Cpd
ENSMUSG00000037119	155.142	-0.511356	0.238067	-2.14795	0.0317174	0.999757	Fam91a1
ENSMUSG00000025757	596.354	0.511342	0.23813	2.14733	0.0317674	0.999757	Hspa4l
ENSMUSG00000041115	17.927	-1.18736	0.55328	-2.14604	0.0318701	0.999757	Iqsec2
ENSMUSG00000022540	64.0509	-0.811233	0.378091	-2.1456	0.0319045	0.999757	Rogdi
ENSMUSG00000064358	6383.05	0.310087	0.144766	2.14199	0.0321942	0.999757	COX3
ENSMUSG00000006154	73.5884	0.90494	0.422682	2.14095	0.0322782	0.999757	Eps8l1
ENSMUSG00000044600	134.618	-0.622984	0.291301	-2.13863	0.0324658	0.999757	Smim7
ENSMUSG00000039275	187.9	-0.494919	0.231426	-2.13857	0.0324709	0.999757	Foxk2
ENSMUSG00000050966	5.27632	-2.814	1.31592	-2.13842	0.0324823	0.999757	Lin28a
ENSMUSG00000038174	103.671	0.713909	0.334029	2.13727	0.0325764	0.999757	Fam126b
ENSMUSG00000047583	23.1296	-1.21344	0.567899	-2.13672	0.032621	0.999757	Tyw3
ENSMUSG00000021752	21.0301	1.1627	0.544403	2.13574	0.0327009	0.999757	Kctd6
ENSMUSG00000115792	13.1519	-1.32025	0.618348	-2.13512	0.032751	0.999757	Vmn1r16
ENSMUSG00000059474	334.194	0.421117	0.197415	2.13316	0.0329117	0.999757	Mbtd1
ENSMUSG00000074063	18.1828	-1.59941	0.750044	-2.13242	0.032972	0.999757	Osgin1
ENSMUSG00000031985	121.888	-0.570622	0.267625	-2.13217	0.0329929	0.999757	Gnpat
ENSMUSG00000059366	16.6922	1.31844	0.61936	2.12871	0.0332785	0.999757	Olfr959
ENSMUSG00000028634	129.173	-0.633909	0.297916	-2.12781	0.0333525	0.999757	Hivep3
ENSMUSG00000032515	79.2661	-0.817129	0.384697	-2.12409	0.0336628	0.999757	Csrnp1
ENSMUSG00000028719	348.643	0.41545	0.195682	2.12309	0.0337465	0.999757	Cmpk1
ENSMUSG00000004500	25.7932	-0.949776	0.447383	-2.12296	0.0337573	0.999757	Zfp324
ENSMUSG00000028494	57.623	0.721151	0.339873	2.12182	0.0338527	0.999757	Plin2
ENSMUSG00000067149	18.3269	1.31971	0.622427	2.12026	0.0339839	0.999757	Jchain
ENSMUSG00000063236	55.6816	0.667762	0.315357	2.11748	0.0342195	0.999757	1110038F14Rik
ENSMUSG00000063808	41.9779	-0.792814	0.374434	-2.11737	0.0342289	0.999757	Gpatch1
ENSMUSG00000054191	25.9686	1.05584	0.498778	2.11685	0.0342722	0.999757	Klf1
ENSMUSG00000010461	13.3005	1.42453	0.673612	2.11476	0.0344501	0.999757	Eya4
ENSMUSG00000019822	26.7526	-1.09939	0.520059	-2.11396	0.0345184	0.999757	Smpd2
ENSMUSG00000079597	79.2508	0.772872	0.366148	2.11082	0.0347877	0.999757	Cstdc4
ENSMUSG00000024594	142.294	-0.821146	0.389059	-2.11059	0.0348075	0.999757	Prrc1
ENSMUSG00000054717	94.1481	0.586316	0.277996	2.10908	0.0349376	0.999757	Hmgb2
ENSMUSG00000075153	21.7472	1.15222	0.546641	2.10782	0.0350464	0.999757	Olfr1135
ENSMUSG00000026843	74.4662	0.828965	0.393293	2.10775	0.0350523	0.999757	Fubp3
ENSMUSG00000033697	114.856	0.509467	0.241834	2.10668	0.0351455	0.999757	Arhgap39
ENSMUSG00000073435	14.0111	1.25963	0.598045	2.10625	0.0351824	0.999757	Nme3
ENSMUSG00000003032	102.222	0.565133	0.268433	2.1053	0.035265	0.999757	Klf4
ENSMUSG00000111164	15.5313	2.16855	1.03056	2.10425	0.0353564	0.999757	NA
ENSMUSG00000062456	23.2441	8.22081	3.90907	2.10301	0.035465	0.999757	Rpl9-ps6
ENSMUSG00000059288	1178.36	0.473531	0.225216	2.10256	0.0355043	0.999757	Cdyl
ENSMUSG00000022999	126.947	-0.665836	0.316817	-2.10164	0.0355846	0.999757	Lmbr1l
ENSMUSG00000031826	165.33	-0.513459	0.244468	-2.10031	0.0357014	0.999757	Usp10
ENSMUSG00000001300	12.4542	1.71725	0.818696	2.09754	0.0359455	0.999757	Efnb2
ENSMUSG00000020654	32.0204	-1.0008	0.477548	-2.09571	0.0361081	0.999757	Adcy3
ENSMUSG00000024079	306.767	0.395605	0.188793	2.09544	0.0361316	0.999757	Eif2ak2
ENSMUSG00000014496	719.741	0.418806	0.199945	2.09461	0.0362057	0.999757	Ankrd28
ENSMUSG00000057315	68.0681	-0.689962	0.329546	-2.09368	0.0362886	0.999757	Arhgap24
ENSMUSG00000020220	876.446	0.399567	0.190913	2.09293	0.0363552	0.999757	Vps13d
ENSMUSG00000101249	6101.42	-0.366418	0.175111	-2.09248	0.0363954	0.999757	NA
ENSMUSG00000020721	428.096	-0.425109	0.203184	-2.09224	0.0364172	0.999757	Helz
ENSMUSG00000040565	1111.44	-0.65253	0.311924	-2.09195	0.0364428	0.999757	Btaf1
ENSMUSG00000032477	55.7754	0.917428	0.438594	2.09175	0.0364612	0.999757	Cdc25a
ENSMUSG00000026820	18.0452	1.4482	0.692483	2.09131	0.0365	0.999757	Ptges2
ENSMUSG00000032902	415.774	0.454113	0.217254	2.09024	0.036596	0.999757	Slc16a1
ENSMUSG00000025969	87.3487	0.790373	0.378189	2.08989	0.0366279	0.999757	Nrp2
ENSMUSG00000032046	107.247	-0.541422	0.259455	-2.08677	0.036909	0.999757	Abhd12
ENSMUSG00000020091	591.169	-0.433877	0.207965	-2.0863	0.0369518	0.999757	Eif4ebp2
ENSMUSG00000062980	5.78874	2.0079	0.962498	2.08613	0.0369668	0.999757	Cped1
ENSMUSG00000030789	178.74	0.560965	0.268969	2.08561	0.0370136	0.999757	Itgax
ENSMUSG00000038593	119.562	-0.670654	0.32159	-2.08543	0.0370299	0.999757	Tctn1
ENSMUSG00000032740	548.473	0.410657	0.197132	2.08316	0.0372371	0.999757	Ccdc88a
ENSMUSG00000036977	64.5853	-0.660084	0.31695	-2.08261	0.0372864	0.999757	Anapc10
ENSMUSG00000026174	83.9169	0.664806	0.319491	2.08083	0.0374495	0.999757	Cnot9
ENSMUSG00000038546	390.258	0.416701	0.200365	2.07971	0.0375518	0.999757	Ranbp9
ENSMUSG00000020492	65.1832	0.706023	0.339781	2.07788	0.0377207	0.999757	Ska2
ENSMUSG00000071715	194.743	-0.547286	0.263681	-2.07556	0.0379348	0.999757	Ncf4
ENSMUSG00000002319	34.6964	-1.25205	0.603511	-2.07461	0.0380223	0.999757	Ipo4
ENSMUSG00000047098	184.548	-0.624317	0.301188	-2.07285	0.0381862	0.999757	Rnf31
ENSMUSG00000034557	158.546	0.601301	0.290207	2.07197	0.0382682	0.999757	Zfyve9
ENSMUSG00000021575	14.1025	1.64787	0.796936	2.06776	0.0386631	0.999757	Ahrr
ENSMUSG00000024769	26.5892	1.30954	0.635121	2.06188	0.0392193	0.999757	Cdc42bpg
ENSMUSG00000090665	45.6496	-0.815283	0.395906	-2.05929	0.0394669	0.999757	NA
ENSMUSG00000025326	1098.54	0.392614	0.190856	2.05712	0.0396749	0.999757	Ube3a
ENSMUSG00000015467	4.15202	2.46988	1.20142	2.05581	0.0398013	0.999757	Egfl8
ENSMUSG00000036572	297.799	0.482275	0.234764	2.05429	0.0399474	0.999757	Upf3b
ENSMUSG00000030474	46.3362	-0.85815	0.417889	-2.05354	0.0400204	0.999757	Siglece
ENSMUSG00000079685	52.0503	0.854185	0.41644	2.05116	0.0402514	0.999757	Ulbp1
ENSMUSG00000025856	51.1118	0.823604	0.401559	2.05102	0.0402654	0.999757	Pdgfa
ENSMUSG00000095088	5.97574	-2.43989	1.18968	-2.05088	0.0402791	0.999757	Trav11d
ENSMUSG00000033486	7.24841	-1.72157	0.840161	-2.0491	0.0404523	0.999757	Catsper2
ENSMUSG00000030683	12.0634	-1.45034	0.708857	-2.04602	0.0407542	0.999757	Sez6l2
ENSMUSG00000026179	15.4262	-1.23172	0.60223	-2.04527	0.0408286	0.999757	Pnkd
ENSMUSG00000069520	66.1358	-0.623321	0.304823	-2.04486	0.0408688	0.999757	Tmem19
ENSMUSG00000068947	19.4195	1.14865	0.561809	2.04456	0.040898	0.999757	Olfr366
ENSMUSG00000022503	63.9791	-0.606072	0.296987	-2.04074	0.041277	0.999757	Nubp1
ENSMUSG00000058281	24.848	1.35219	0.662992	2.03953	0.0413976	0.999757	NA
ENSMUSG00000034636	250.41	-0.399991	0.196426	-2.03634	0.041716	0.999757	Zyg11b
ENSMUSG00000052534	133.552	-0.669859	0.329002	-2.03603	0.0417473	0.999757	Pbx1
ENSMUSG00000020388	4.09711	2.34458	1.15175	2.03567	0.0417832	0.999757	Pdlim4
ENSMUSG00000020893	113.719	-0.584462	0.287391	-2.03369	0.0419832	0.999757	Per1
ENSMUSG00000035173	225.044	0.554597	0.272819	2.03284	0.0420689	0.999757	Ccdc186
ENSMUSG00000032307	191.624	0.480719	0.236596	2.03181	0.0421725	0.999757	Ube2q2
ENSMUSG00000085328	503.864	0.384495	0.189369	2.0304	0.0423162	0.999757	NA
ENSMUSG00000036975	13.2402	1.24009	0.610879	2.03001	0.0423554	0.999757	Tmem177
ENSMUSG00000067235	233.399	-0.507457	0.250015	-2.0297	0.0423867	0.999757	H2-Q10
ENSMUSG00000018927	283.051	-0.535328	0.264087	-2.02709	0.0426533	0.999757	Ccl6
ENSMUSG00000023992	9.62963	1.39386	0.688671	2.02398	0.0429722	0.999757	Trem2
ENSMUSG00000042759	203.528	0.434491	0.214768	2.02308	0.0430652	0.999757	Apobr
ENSMUSG00000048251	350.872	0.52922	0.261707	2.02219	0.0431571	0.999757	Bcl11b
ENSMUSG00000027854	374.513	-0.369638	0.182899	-2.02099	0.0432804	0.999757	Sike1
ENSMUSG00000030966	98.0303	0.531051	0.263056	2.01877	0.0435106	0.999757	Trim21
ENSMUSG00000079293	281.163	-0.675216	0.33451	-2.01852	0.0435367	0.999757	Clec7a
ENSMUSG00000037325	11.4748	1.40615	0.696646	2.01846	0.0435432	0.999757	Bbs7
ENSMUSG00000001999	34.7515	0.82221	0.407685	2.01678	0.0437187	0.999757	Blvra
ENSMUSG00000056220	78.5156	0.958942	0.475608	2.01624	0.0437747	0.999757	Pla2g4a
ENSMUSG00000032754	87.5464	0.655993	0.325592	2.01477	0.0439287	0.999757	Slc8b1
ENSMUSG00000032763	35.8607	0.821422	0.408205	2.01228	0.0441903	0.999757	Ilvbl
ENSMUSG00000033124	153.612	-0.454069	0.22593	-2.00978	0.044455	0.999757	Atg9a
ENSMUSG00000029234	58.9261	-0.686094	0.341507	-2.00902	0.0445353	0.999757	Tmem165
ENSMUSG00000028431	87.7665	-0.761517	0.379217	-2.00813	0.0446296	0.999757	Elp1
ENSMUSG00000020649	211.212	0.543711	0.270966	2.00657	0.0447956	0.999757	Rrm2
ENSMUSG00000028842	221.015	0.444532	0.221842	2.00382	0.0450889	0.999757	Ago3
ENSMUSG00000066643	3.67461	2.70951	1.35284	2.00283	0.045196	0.999757	Wdr35
ENSMUSG00000031766	8.51489	1.93412	0.96581	2.00259	0.0452212	0.999757	Slc12a3
ENSMUSG00000036943	1176.47	0.438098	0.21879	2.00237	0.0452452	0.999757	Rab8b
ENSMUSG00000030577	1483.84	-0.414359	0.207068	-2.00108	0.0453839	0.999757	Cd22
ENSMUSG00000047747	45.8982	0.850335	0.425051	2.00055	0.0454411	0.999757	Rnf150
ENSMUSG00000031935	86.8891	-0.699807	0.350201	-1.9983	0.0456843	0.999757	Med17
ENSMUSG00000024480	578.72	0.389317	0.194945	1.99706	0.045819	0.999757	Ap3s1
ENSMUSG00000050332	85.9559	0.598862	0.300022	1.99606	0.0459271	0.999757	Amer1
ENSMUSG00000021986	22.7656	-1.27993	0.641987	-1.99371	0.0461843	0.999757	Amer2
ENSMUSG00000029345	66.9247	0.621243	0.311739	1.99283	0.0462802	0.999757	Tfip11
ENSMUSG00000024018	121.004	-0.603089	0.302701	-1.99236	0.0463321	0.999757	Ccdc167
ENSMUSG00000002274	11.2155	-1.40564	0.705578	-1.99219	0.0463505	0.999757	Metrn
ENSMUSG00000027274	27.3072	1.12021	0.562306	1.99217	0.0463525	0.999757	Mkks
ENSMUSG00000037364	481.13	-0.379444	0.190486	-1.99198	0.0463729	0.999757	Srrt
ENSMUSG00000025647	2049.28	-0.514494	0.258346	-1.99149	0.0464271	0.999757	Shisa5
ENSMUSG00000026656	741.221	0.452281	0.227169	1.99094	0.046487	0.999757	Fcgr2b
ENSMUSG00000101309	118.467	0.781037	0.392358	1.99062	0.0465226	0.999757	NA
ENSMUSG00000024795	197.439	0.432074	0.217287	1.98849	0.0467571	0.999757	Kif20b
ENSMUSG00000030621	44.8405	-0.741426	0.373114	-1.98713	0.0469083	0.999757	Me3
ENSMUSG00000051118	251.387	0.570057	0.287013	1.98617	0.0470145	0.999757	Olfr77
ENSMUSG00000033323	112.888	-0.615516	0.309939	-1.98593	0.0470415	0.999757	Ctdp1
ENSMUSG00000027088	89.1119	0.633046	0.319211	1.98316	0.0473499	0.999757	Phospho2
ENSMUSG00000031731	360.477	0.418822	0.211202	1.98304	0.0473631	0.999757	Ap1g1
ENSMUSG00000021870	707.63	0.536878	0.271164	1.9799	0.0477148	0.999757	Slmap
ENSMUSG00000022905	1345.2	0.470318	0.23762	1.97928	0.0477842	0.999757	Kpna1
ENSMUSG00000028820	1215.36	0.322572	0.162976	1.97926	0.047787	0.999757	Sfpq
ENSMUSG00000071856	24.6442	1.02309	0.517338	1.9776	0.0479741	0.999757	Mcc
ENSMUSG00000027810	241.024	0.391853	0.19818	1.97726	0.0480123	0.999757	Eif2a
ENSMUSG00000026239	23.3525	-0.939588	0.476032	-1.97379	0.0484056	0.999757	Pde6d
ENSMUSG00000090272	1266.87	-0.328226	0.16632	-1.97346	0.0484429	0.999757	Mndal
ENSMUSG00000030168	270.668	0.467599	0.236975	1.9732	0.048473	0.999757	Adipor2
ENSMUSG00000024778	22.2655	-1.06034	0.537481	-1.97279	0.0485193	0.999757	Fas
ENSMUSG00000069792	23.4344	-1.32558	0.672172	-1.97208	0.0486002	0.999757	Wfdc17
ENSMUSG00000021250	36.6569	-1.15348	0.585116	-1.97137	0.0486815	0.999757	Fos
ENSMUSG00000020652	65.9129	-0.61157	0.310269	-1.97109	0.0487132	0.999757	Cenpo
ENSMUSG00000094200	7.95857	1.73014	0.878007	1.97053	0.0487778	0.999757	Olfr237
ENSMUSG00000054676	80.8483	-0.649056	0.329512	-1.96975	0.0488669	0.999757	1600014C10Rik
ENSMUSG00000079707	18.574	1.10896	0.563262	1.96882	0.0489735	0.999757	Dynlt2a1
ENSMUSG00000022884	1541.46	0.470533	0.239091	1.96801	0.049067	0.999757	Eif4a2
ENSMUSG00000117819	15.4546	-1.33588	0.679238	-1.96673	0.0492148	0.999757	NA
ENSMUSG00000020014	23.0293	-0.982904	0.499794	-1.96662	0.0492273	0.999757	Cfap54
ENSMUSG00000044456	783.68	-0.318691	0.162211	-1.96467	0.0494522	0.999757	Rin3
ENSMUSG00000021615	67.3952	-0.647815	0.329926	-1.96352	0.049586	0.999757	Xrcc4
ENSMUSG00000014030	1576.21	-0.311544	0.158722	-1.96283	0.0496665	0.999757	Pax5
ENSMUSG00000028005	604.998	0.601191	0.306346	1.96246	0.0497094	0.999757	Gucy1b1
ENSMUSG00000068921	66.722	-0.614065	0.312958	-1.96213	0.0497474	0.999757	Dap3
ENSMUSG00000053436	425.489	-0.380931	0.19435	-1.96003	0.0499927	0.999757	Mapk14
ENSMUSG00000025808	2.35683	4.93374	1.80822	2.72851	0.00636215	NA	Ccdc7a
ENSMUSG00000043223	2.89208	5.23895	1.9228	2.72464	0.00643708	NA	Gm4835
ENSMUSG00000103986	2.69235	-4.63125	1.70573	-2.71511	0.00662532	NA	NA
ENSMUSG00000029223	2.27444	4.84772	1.83091	2.6477	0.00810404	NA	Uchl1
ENSMUSG00000107478	3.28095	-4.92577	1.91012	-2.57877	0.00991516	NA	NA
ENSMUSG00000027896	2.25165	4.83968	1.87925	2.57532	0.0100146	NA	Slc16a4
ENSMUSG00000113606	2.5378	5.05217	1.98155	2.5496	0.0107846	NA	NA
ENSMUSG00000068466	2.32274	-4.42513	1.7726	-2.4964	0.0125461	NA	NA
ENSMUSG00000079362	2.90089	-4.74146	1.97461	-2.40121	0.016341	NA	NA
ENSMUSG00000095457	1.80806	4.55456	1.96917	2.31293	0.0207264	NA	NA
ENSMUSG00000000183	3.41744	3.58775	1.59031	2.25601	0.0240698	NA	Fgf6
ENSMUSG00000063935	2.87024	-3.67771	1.65673	-2.21986	0.0264285	NA	Zar1
ENSMUSG00000038630	1.86631	-4.0994	1.87438	-2.18707	0.0287376	NA	Zkscan16
ENSMUSG00000027871	2.92898	4.21203	1.93482	2.17697	0.0294831	NA	Hsd3b1
ENSMUSG00000081455	2.4418	-4.48239	2.0664	-2.16918	0.0300691	NA	NA
ENSMUSG00000074397	3.40823	3.4402	1.5884	2.16583	0.030324	NA	Foxr1
ENSMUSG00000024713	3.16393	3.16133	1.46253	2.16155	0.0306531	NA	Pcsk5
ENSMUSG00000112239	1.898	-4.12133	1.90755	-2.16054	0.0307313	NA	Gm17823
ENSMUSG00000099342	1.87887	4.61838	2.14788	2.1502	0.0315392	NA	Gm18180
ENSMUSG00000096615	2.59222	5.07615	2.36985	2.14197	0.032196	NA	Trav11
ENSMUSG00000079297	2.66864	5.06437	2.39455	2.11495	0.034434	NA	NA
ENSMUSG00000040323	2.28089	-4.39092	2.08237	-2.10862	0.0349774	NA	NA
ENSMUSG00000039960	2.55549	-3.50253	1.67822	-2.08705	0.0368838	NA	Rhou
ENSMUSG00000000942	2.14374	3.70691	1.78974	2.0712	0.0383401	NA	Hoxa4
ENSMUSG00000081968	1.71765	-3.98069	1.92624	-2.06656	0.038776	NA	Rpl23a-ps2
ENSMUSG00000019558	1.72391	4.50461	2.20092	2.04669	0.0406881	NA	Slc6a8
ENSMUSG00000097906	2.07671	-4.25201	2.14869	-1.97888	0.0478294	NA	Gm9625
ENSMUSG00000113640	2.04157	-4.2381	2.15852	-1.96343	0.0495966	NA	Adat3

## Sheet: Blood Female (p<0.05)
	baseMean	log2FoldChange	lfcSE	stat	pvalue	padj	symbol
ENSMUSG00000052794	28.8647	-2.25187	0.533336	-4.22223	2.41893e-05	0.232758	1700030K09Rik
ENSMUSG00000059058	7.11559	6.0062	1.44223	4.16452	3.12008e-05	0.232758	NA
ENSMUSG00000049233	6.56911	-6.24879	1.55407	-4.02092	5.79724e-05	0.288316	Apoo-ps
ENSMUSG00000032579	13.0906	-2.35368	0.683478	-3.44368	0.000573846	0.999687	Hemk1
ENSMUSG00000045868	14376.8	1.89712	0.554888	3.41893	0.000628689	0.999687	Gvin1
ENSMUSG00000024525	30.0655	1.65832	0.489306	3.38913	0.000701151	0.999687	Impa2
ENSMUSG00000101249	5652.43	1.04773	0.332301	3.15297	0.00161621	0.999687	NA
ENSMUSG00000097565	3.26734	-5.59678	1.78189	-3.14092	0.00168417	0.999687	NA
ENSMUSG00000074903	670.531	1.70907	0.549423	3.11066	0.00186669	0.999687	NA
ENSMUSG00000099241	368.713	1.45134	0.466916	3.10834	0.00188139	0.999687	Gvin-ps2
ENSMUSG00000078606	8157.86	1.65287	0.547191	3.02064	0.00252239	0.999687	Gvin2
ENSMUSG00000061411	125.329	1.07249	0.363518	2.9503	0.00317467	0.999687	Nol4l
ENSMUSG00000073542	317.734	1.2554	0.42558	2.94987	0.00317908	0.999687	Cep76
ENSMUSG00000037363	88.7597	1.19446	0.407864	2.92857	0.00340527	0.999687	Letm2
ENSMUSG00000110234	23.4167	-1.78034	0.613471	-2.90208	0.00370693	0.999687	Timm10b
ENSMUSG00000089669	22.0144	-1.67033	0.580393	-2.87793	0.00400291	0.999687	Tnfsf13
ENSMUSG00000110298	14.172	1.96798	0.685012	2.87291	0.00406711	0.999687	NA
ENSMUSG00000037416	1293.7	1.02682	0.357435	2.87276	0.00406901	0.999687	Dmxl1
ENSMUSG00000046404	2526.34	1.01528	0.354131	2.86697	0.00414418	0.999687	Yod1
ENSMUSG00000043885	23.3038	-1.52422	0.531659	-2.86691	0.00414507	0.999687	Slc36a4
ENSMUSG00000008730	14394.4	0.964486	0.338734	2.84733	0.00440878	0.999687	Hipk1
ENSMUSG00000032558	15.4114	-1.84242	0.65319	-2.82065	0.00479257	0.999687	Nphp3
ENSMUSG00000026853	754.551	1.32529	0.470655	2.81584	0.00486493	0.999687	Crat
ENSMUSG00000025937	172.386	0.890193	0.31639	2.8136	0.00489904	0.999687	Lactb2
ENSMUSG00000026826	11.06	3.04745	1.08662	2.80453	0.00503906	0.999687	Nr4a2
ENSMUSG00000022305	9.44771	-2.488	0.890703	-2.7933	0.00521729	0.999687	Lrp12
ENSMUSG00000020707	14.9461	1.69956	0.609523	2.78835	0.00529778	0.999687	Rnf135
ENSMUSG00000026827	189.847	-0.910808	0.326855	-2.78658	0.00532668	0.999687	Gpd2
ENSMUSG00000028037	16.065	2.79317	1.00369	2.7829	0.0053876	0.999687	Ifi44
ENSMUSG00000062683	16.6663	-3.33561	1.19995	-2.7798	0.00543928	0.999687	Atp5g2
ENSMUSG00000001036	7.62512	-2.52355	0.916825	-2.75249	0.00591431	0.999687	Epn2
ENSMUSG00000090625	53.5363	1.59304	0.579674	2.74816	0.00599308	0.999687	NA
ENSMUSG00000006575	13.6991	2.08604	0.761087	2.74087	0.00612775	0.999687	Rundc3a
ENSMUSG00000110040	66.7422	1.45266	0.532342	2.7288	0.0063565	0.999687	NA
ENSMUSG00000028960	284.04	-0.872861	0.320178	-2.72617	0.00640732	0.999687	Ube4b
ENSMUSG00000098934	545.271	1.40632	0.519815	2.70543	0.00682157	0.999687	Gvin-ps4
ENSMUSG00000059040	2.42776	-5.17368	1.91394	-2.70315	0.00686847	0.999687	Eno1b
ENSMUSG00000034949	23.959	-2.62547	0.973394	-2.69723	0.00699191	0.999687	Zfr2
ENSMUSG00000040809	58.6566	-1.11056	0.413971	-2.68269	0.00730318	0.999687	Chil3
ENSMUSG00000026181	42.886	-1.41512	0.528896	-2.67561	0.0074593	0.999687	Ppm1f
ENSMUSG00000027993	39.3892	-1.55752	0.584048	-2.66676	0.00765857	0.999687	Trim2
ENSMUSG00000092560	2.35592	-5.12972	1.93016	-2.65767	0.00786837	0.999687	NA
ENSMUSG00000067220	10.2764	-2.26834	0.857274	-2.64599	0.00814532	0.999687	Cnga1
ENSMUSG00000025077	24.8686	1.53147	0.582672	2.62835	0.00857999	0.999687	Dclre1a
ENSMUSG00000001366	1593.47	1.06955	0.409811	2.60985	0.00905809	0.999687	Fbxo9
ENSMUSG00000091814	9.79988	-2.25376	0.868243	-2.59577	0.00943799	0.999687	Gm8050
ENSMUSG00000030282	3144.07	1.35251	0.523163	2.58526	0.00973057	0.999687	Cmas
ENSMUSG00000028572	66.5352	1.21559	0.472297	2.57377	0.0100596	0.999687	Hook1
ENSMUSG00000107877	17.189	-2.00264	0.778246	-2.57327	0.0100743	0.999687	4933427D14Rik
ENSMUSG00000026873	14.3904	-1.70665	0.663239	-2.5732	0.0100763	0.999687	Phf19
ENSMUSG00000022180	22.8148	-1.4538	0.565829	-2.56933	0.0101895	0.999687	Slc7a8
ENSMUSG00000021572	35.604	1.35238	0.52975	2.55286	0.0106842	0.999687	Cep72
ENSMUSG00000070565	10.2338	2.3805	0.933365	2.55045	0.0107583	0.999687	Rasal2
ENSMUSG00000007659	6057.07	1.05675	0.416527	2.53705	0.0111792	0.999687	Bcl2l1
ENSMUSG00000017716	97.7943	1.31561	0.519902	2.53049	0.0113905	0.999687	Birc5
ENSMUSG00000024211	4.72248	3.10767	1.23294	2.52054	0.0117177	0.999687	Grm8
ENSMUSG00000096351	114.54	1.33011	0.527797	2.52011	0.0117318	0.999687	Samd11
ENSMUSG00000047048	14.7073	1.67953	0.66824	2.51337	0.0119585	0.999687	Olfr432
ENSMUSG00000025876	8.33335	-2.03454	0.810689	-2.50964	0.0120854	0.999687	Unc5a
ENSMUSG00000039197	89.311	1.05477	0.421229	2.50403	0.0122788	0.999687	Adk
ENSMUSG00000042632	35.9472	1.08321	0.43302	2.50152	0.012366	0.999687	Pla2g6
ENSMUSG00000040435	694.433	1.05218	0.420842	2.50018	0.0124132	0.999687	Ppp1r15a
ENSMUSG00000083282	81.006	1.60437	0.642238	2.4981	0.0124863	0.999687	Ctsf
ENSMUSG00000027963	12.1328	2.20228	0.882161	2.49646	0.0125442	0.999687	Extl2
ENSMUSG00000020053	3.62308	3.82496	1.54049	2.48294	0.0130302	0.999687	Igf1
ENSMUSG00000026502	118.03	-1.01356	0.408831	-2.47916	0.0131691	0.999687	Desi2
ENSMUSG00000026200	22.4176	1.42126	0.574598	2.47348	0.0133804	0.999687	Glb1l
ENSMUSG00000024900	249.594	-0.789189	0.319174	-2.4726	0.0134134	0.999687	Cpt1a
ENSMUSG00000020102	67.0064	-1.40764	0.572732	-2.45777	0.0139804	0.999687	Slc16a7
ENSMUSG00000058216	61.8821	1.43576	0.585674	2.45147	0.0142275	0.999687	Gstp3
ENSMUSG00000047888	2640.71	0.597547	0.243802	2.45095	0.0142481	0.999687	Tnrc6b
ENSMUSG00000116868	6.17473	2.65045	1.08147	2.45078	0.0142548	0.999687	NA
ENSMUSG00000037410	275.219	1.21446	0.49631	2.44698	0.0144058	0.999687	Tbc1d2b
ENSMUSG00000035246	187.811	1.04858	0.429389	2.44202	0.0146052	0.999687	Pcyt1b
ENSMUSG00000032890	6.08392	-2.84975	1.16762	-2.44064	0.0146612	0.999687	Rims3
ENSMUSG00000042744	2254.65	0.842022	0.345593	2.43646	0.0148319	0.999687	Hectd4
ENSMUSG00000026348	377.382	1.10757	0.456129	2.42819	0.0151744	0.999687	Acmsd
ENSMUSG00000045962	3480.71	0.718227	0.295894	2.42731	0.0152112	0.999687	Wnk1
ENSMUSG00000050157	93.6863	1.27011	0.525312	2.41782	0.0156137	0.999687	Gm867
ENSMUSG00000035299	378.808	0.768968	0.3189	2.41131	0.0158953	0.999687	Mid1
ENSMUSG00000022962	91.3299	-0.847797	0.352298	-2.40648	0.0161073	0.999687	Gart
ENSMUSG00000028878	159.092	1.1587	0.482046	2.40372	0.0162293	0.999687	Fam76a
ENSMUSG00000073060	19.9257	-2.05154	0.855552	-2.39791	0.0164889	0.999687	NA
ENSMUSG00000027510	1782.34	1.11837	0.468048	2.38943	0.0168744	0.999687	Rbm38
ENSMUSG00000029403	17.8095	-2.8527	1.19694	-2.38333	0.0171567	0.999687	Cdkl2
ENSMUSG00000045136	45.2981	1.01513	0.426161	2.38204	0.0172168	0.999687	Tubb2b
ENSMUSG00000032185	573.88	0.973953	0.410366	2.37338	0.0176261	0.999687	Carm1
ENSMUSG00000027167	28.0537	1.42539	0.600622	2.37319	0.0176353	0.999687	Elp4
ENSMUSG00000022265	506.98	0.906472	0.382023	2.37282	0.017653	0.999687	Ank
ENSMUSG00000082585	46.1574	-9.2448	3.90877	-2.36515	0.018023	0.999687	NA
ENSMUSG00000066800	1057.42	0.995478	0.421253	2.36313	0.0181211	0.999687	Rnasel
ENSMUSG00000091694	24112.7	2.30102	0.973995	2.36246	0.0181542	0.999687	Apol11b
ENSMUSG00000020300	2648.72	0.777191	0.329859	2.35613	0.0184664	0.999687	Cpeb4
ENSMUSG00000063952	959.829	0.953105	0.405282	2.35171	0.0186875	0.999687	Brpf3
ENSMUSG00000050982	208.775	2.93529	1.24911	2.34991	0.018778	0.999687	Apol10a
ENSMUSG00000090946	889.423	0.780561	0.334079	2.33646	0.0194673	0.999687	Ccdc71l
ENSMUSG00000090000	69.6099	-1.12654	0.482257	-2.33598	0.0194924	0.999687	Ier3ip1
ENSMUSG00000024712	3151.62	1.01915	0.437876	2.32748	0.0199395	0.999687	Rfk
ENSMUSG00000049409	242.548	0.696097	0.299253	2.32611	0.0200125	0.999687	Prokr1
ENSMUSG00000032026	500.572	1.16119	0.499744	2.32357	0.0201484	0.999687	Rexo2
ENSMUSG00000070871	72.851	1.01763	0.438073	2.32298	0.0201804	0.999687	Ccnyl1
ENSMUSG00000096736	3.76049	-3.11424	1.34415	-2.31688	0.0205104	0.999687	NA
ENSMUSG00000023156	24.2002	-1.42616	0.61621	-2.3144	0.0206457	0.999687	Rpp14
ENSMUSG00000001865	8.07373	-2.12603	0.919994	-2.31092	0.0208373	0.999687	Cpa3
ENSMUSG00000028669	215.388	1.06506	0.461002	2.31031	0.0208711	0.999687	Pithd1
ENSMUSG00000021565	16.0084	-1.48454	0.64259	-2.31025	0.0208745	0.999687	Slc6a19
ENSMUSG00000028496	913.567	0.981655	0.425009	2.30973	0.0209031	0.999687	Mllt3
ENSMUSG00000024160	66.2036	0.923638	0.400302	2.30735	0.0210352	0.999687	Spsb3
ENSMUSG00000026028	2037.5	0.999409	0.433822	2.30373	0.0212376	0.999687	Trak2
ENSMUSG00000037415	2657.55	0.988295	0.434518	2.27446	0.0229382	0.999687	Ranbp10
ENSMUSG00000019433	52.6096	0.944033	0.415282	2.27323	0.0230121	0.999687	Gipc1
ENSMUSG00000075296	47.4372	1.23183	0.543592	2.26609	0.0234459	0.999687	Aldh3b2
ENSMUSG00000017697	5.41751	2.36378	1.0434	2.26546	0.0234847	0.999687	Ada
ENSMUSG00000028542	178.008	1.21631	0.536976	2.26511	0.0235056	0.999687	Slc6a9
ENSMUSG00000029998	83.3779	-1.31591	0.581152	-2.26431	0.0235548	0.999687	Pcyox1
ENSMUSG00000031072	60.606	0.983271	0.434286	2.26411	0.0235674	0.999687	LTO1
ENSMUSG00000052748	678.885	0.861216	0.380689	2.26226	0.0236815	0.999687	Swt1
ENSMUSG00000101878	2.67215	-5.24176	2.31707	-2.26224	0.0236828	0.999687	NA
ENSMUSG00000096887	41868	-2.93903	1.30726	-2.24823	0.0245612	0.999687	Gm20594
ENSMUSG00000027775	95.8365	-0.889146	0.396864	-2.24043	0.0250631	0.999687	Mfsd1
ENSMUSG00000026867	565.509	0.74028	0.33105	2.23616	0.0253412	0.999687	Gapvd1
ENSMUSG00000018537	15.1404	1.41825	0.63443	2.23548	0.0253859	0.999687	Pcgf2
ENSMUSG00000039883	17.1592	-1.8682	0.835759	-2.23534	0.0253953	0.999687	Lrrc17
ENSMUSG00000073008	268.128	-0.674127	0.301754	-2.23403	0.0254811	0.999687	Gpr174
ENSMUSG00000101309	88.9299	0.8376	0.376148	2.22678	0.0259618	0.999687	NA
ENSMUSG00000021040	25.8739	-1.15023	0.518865	-2.21681	0.0266359	0.999687	Slirp
ENSMUSG00000051007	59.3397	-0.95939	0.433144	-2.21494	0.0267639	0.999687	Gatd1
ENSMUSG00000056899	11.763	1.7069	0.772056	2.21086	0.0270458	0.999687	Immp2l
ENSMUSG00000096615	2.50409	-5.16084	2.33445	-2.21073	0.0270547	0.999687	Trav11
ENSMUSG00000090698	15.0128	1.42759	0.645935	2.21011	0.0270973	0.999687	Apold1
ENSMUSG00000058589	2.96189	4.02293	1.82128	2.20885	0.0271852	0.999687	Anks1b
ENSMUSG00000030149	277.513	0.617188	0.279496	2.20822	0.0272293	0.999687	Klrk1
ENSMUSG00000053716	141.34	-0.678061	0.307456	-2.20539	0.0274266	0.999687	Dusp7
ENSMUSG00000023216	2322.82	1.10654	0.503823	2.19629	0.0280711	0.999687	Epb42
ENSMUSG00000030499	4.72097	-3.10568	1.41429	-2.19593	0.0280966	0.999687	Kctd15
ENSMUSG00000038374	108.987	-0.720469	0.328297	-2.19456	0.0281948	0.999687	Rbm8a
ENSMUSG00000059708	23.5259	1.26859	0.578089	2.19446	0.0282022	0.999687	Akap17b
ENSMUSG00000035342	7.4516	2.22407	1.01562	2.18987	0.0285338	0.999687	Lzts2
ENSMUSG00000025268	90.9367	0.805059	0.367892	2.1883	0.0286476	0.999687	Maged2
ENSMUSG00000052459	131.731	-0.716469	0.32746	-2.18796	0.0286724	0.999687	Atp6v1a
ENSMUSG00000021983	30.3684	1.08991	0.498516	2.1863	0.0287933	0.999687	Atp8a2
ENSMUSG00000073400	2933.76	1.16149	0.531825	2.18397	0.0289641	0.999687	Trim10
ENSMUSG00000050860	7250.55	0.947149	0.434548	2.17962	0.0292858	0.999687	Phospho1
ENSMUSG00000020961	457.016	0.579134	0.266117	2.17624	0.0295376	0.999687	Ston2
ENSMUSG00000061576	3.73732	2.80673	1.29155	2.17315	0.0297688	0.999687	Dpp6
ENSMUSG00000045348	1.89984	4.11225	1.89243	2.173	0.0297801	0.999687	Nyap1
ENSMUSG00000027217	54.5954	0.991832	0.456786	2.17133	0.0299065	0.999687	Tspan18
ENSMUSG00000028328	1110.46	0.985843	0.454908	2.16713	0.0302253	0.999687	Tmod1
ENSMUSG00000043872	67.7903	0.971449	0.448974	2.16371	0.0304866	0.999687	Zmym1
ENSMUSG00000064215	149.195	1.24964	0.57761	2.16347	0.030505	0.999687	Ifi27
ENSMUSG00000060002	44.604	0.996086	0.460518	2.16297	0.0305437	0.999687	Chpt1
ENSMUSG00000009376	13.3753	-1.60075	0.741853	-2.15777	0.0309457	0.999687	Met
ENSMUSG00000028460	14.7328	-1.35884	0.633726	-2.14421	0.0320159	0.999687	Sit1
ENSMUSG00000021420	121.091	0.830378	0.387404	2.14344	0.0320776	0.999687	Fars2
ENSMUSG00000029186	350.362	0.841947	0.393021	2.14224	0.032174	0.999687	Pi4k2b
ENSMUSG00000038371	55.5827	-0.96032	0.448894	-2.1393	0.0324112	0.999687	Sbf2
ENSMUSG00000041528	715.023	0.796054	0.372358	2.13787	0.0325271	0.999687	Rnf123
ENSMUSG00000028098	847.233	0.891508	0.41708	2.1375	0.0325575	0.999687	Rnf115
ENSMUSG00000034471	9.06796	-1.68425	0.787999	-2.13738	0.0325673	0.999687	Caskin2
ENSMUSG00000079418	1144.78	1.13651	0.531943	2.13652	0.0326369	0.999687	Atg4a
ENSMUSG00000035969	4.82395	-2.37546	1.11383	-2.1327	0.0329494	0.999687	Rusc2
ENSMUSG00000055319	234.482	-0.832737	0.390489	-2.13255	0.0329615	0.999687	Sec23ip
ENSMUSG00000028988	7.16988	-2.01397	0.947987	-2.12447	0.0336307	0.999687	Ctnnbip1
ENSMUSG00000091650	382.71	2.79541	1.31709	2.12242	0.0338026	0.999687	Apol11a
ENSMUSG00000052736	154.791	0.714808	0.337547	2.11765	0.0342045	0.999687	Klrc2
ENSMUSG00000018199	524.575	0.639015	0.302061	2.11551	0.0343862	0.999687	Ro60
ENSMUSG00000032661	1923.69	0.961678	0.455827	2.10975	0.0348803	0.999687	Oas3
ENSMUSG00000117975	117.17	-0.697366	0.330713	-2.10867	0.0349727	0.999687	Itprip
ENSMUSG00000037106	7.12277	2.53537	1.20279	2.1079	0.0350395	0.999687	Fer1l6
ENSMUSG00000070939	106.89	-0.721539	0.343083	-2.1031	0.0354567	0.999687	Tgfbrap1
ENSMUSG00000059436	2943.66	0.603085	0.286843	2.10249	0.0355104	0.999687	Max
ENSMUSG00000031605	120.294	-0.97683	0.46561	-2.09795	0.0359091	0.999687	Klhl2
ENSMUSG00000000486	927.239	0.817879	0.39065	2.09364	0.0362925	0.999687	Septin1
ENSMUSG00000038524	47.9282	1.01914	0.487179	2.09192	0.0364456	0.999687	Fchsd1
ENSMUSG00000024787	592.948	1.08788	0.520263	2.09103	0.0365255	0.999687	Snx15
ENSMUSG00000067341	164.342	-0.65503	0.313734	-2.08785	0.0368109	0.999687	H2-Eb2
ENSMUSG00000036840	183.586	0.711524	0.340825	2.08765	0.0368291	0.999687	Siah1a
ENSMUSG00000026027	1385.75	0.8183	0.392105	2.08694	0.0368935	0.999687	Stradb
ENSMUSG00000027556	36.2257	1.40225	0.67194	2.08686	0.0369007	0.999687	Car1
ENSMUSG00000051705	13.6466	-1.57839	0.758461	-2.08105	0.0374294	0.999687	Senp8
ENSMUSG00000028557	10271.5	0.75771	0.364243	2.08023	0.0375042	0.999687	Rnf11
ENSMUSG00000020925	46.8368	-1.08726	0.522845	-2.0795	0.0375714	0.999687	Ccdc43
ENSMUSG00000027215	1013.96	0.943475	0.454131	2.07754	0.0377518	0.999687	Cd82
ENSMUSG00000024072	2928.31	0.840349	0.404563	2.07718	0.0377852	0.999687	Yipf4
ENSMUSG00000051811	286.428	1.17399	0.566023	2.07411	0.0380694	0.999687	Cox6b2
ENSMUSG00000024206	256.252	0.818036	0.394483	2.07369	0.0381079	0.999687	Rfx2
ENSMUSG00000018983	3669.23	0.819738	0.39577	2.07125	0.0383356	0.999687	E2f2
ENSMUSG00000064225	2694.86	0.784464	0.378995	2.06985	0.038466	0.999687	Paqr9
ENSMUSG00000050014	121.31	2.41092	1.16698	2.06594	0.0388339	0.999687	Apol10b
ENSMUSG00000034248	75009.5	0.804372	0.389419	2.06557	0.0388692	0.999687	Slc25a37
ENSMUSG00000028124	5978.97	0.949918	0.460353	2.06346	0.0390692	0.999687	Gclm
ENSMUSG00000032077	71.2932	-0.763965	0.371404	-2.05696	0.0396899	0.999687	Bud13
ENSMUSG00000054000	39.0796	1.02413	0.498277	2.05534	0.0398459	0.999687	Tusc1
ENSMUSG00000026203	1182.43	0.943555	0.460602	2.04853	0.0405085	0.999687	Dnajb2
ENSMUSG00000025871	745.821	0.707272	0.345926	2.04457	0.0408968	0.999687	4833439L19Rik
ENSMUSG00000024187	57.8517	-0.9331	0.456799	-2.04269	0.0410829	0.999687	Fam234a
ENSMUSG00000003813	3025.24	1.06987	0.52447	2.0399	0.0413601	0.999687	Rad23a
ENSMUSG00000049881	6.78717	-2.45284	1.20398	-2.03728	0.0416225	0.999687	2810025M15Rik
ENSMUSG00000031170	623.62	0.891661	0.439184	2.03027	0.0423295	0.999687	Slc38a5
ENSMUSG00000016510	35.5622	-0.987217	0.486993	-2.02717	0.042645	0.999687	Mtif3
ENSMUSG00000035376	39.6639	1.07601	0.530945	2.02659	0.0427041	0.999687	Hacd2
ENSMUSG00000044906	63.1723	0.825356	0.407472	2.02555	0.0428108	0.999687	4930503L19Rik
ENSMUSG00000028111	12.6081	1.67691	0.828875	2.02312	0.0430611	0.999687	Ctsk
ENSMUSG00000006818	417.394	0.968602	0.479049	2.02193	0.0431837	0.999687	Sod2
ENSMUSG00000041449	5.95308	2.05312	1.0165	2.01979	0.0434051	0.999687	NA
ENSMUSG00000043059	72.2682	-1.16975	0.579618	-2.01814	0.0435763	0.999687	Zfp513
ENSMUSG00000020178	48.2825	0.944395	0.468004	2.01792	0.0435993	0.999687	Adora2a
ENSMUSG00000043633	42.232	1.10278	0.546807	2.01677	0.0437196	0.999687	Fam221b
ENSMUSG00000027430	29.3282	-1.02764	0.509947	-2.01518	0.0438857	0.999687	Dtd1
ENSMUSG00000036002	1467.79	0.939563	0.466271	2.01506	0.0438987	0.999687	Fam214b
ENSMUSG00000026568	491.864	1.10221	0.547019	2.01494	0.0439108	0.999687	Mpc2
ENSMUSG00000022863	814.855	0.895604	0.444505	2.01483	0.0439221	0.999687	Btg3
ENSMUSG00000113536	2.55481	-3.6415	1.81006	-2.01181	0.0442397	0.999687	NA
ENSMUSG00000014956	52591.3	0.775052	0.385419	2.01094	0.0443323	0.999687	Ppp1cb
ENSMUSG00000105499	2.93505	-3.20087	1.59219	-2.01035	0.044394	0.999687	NA
ENSMUSG00000023078	1.50028	-4.48542	2.23142	-2.01012	0.0444187	0.999687	Cxcl13
ENSMUSG00000015882	200.748	0.75143	0.374022	2.00905	0.0445316	0.999687	Lcorl
ENSMUSG00000029474	93.4023	0.766504	0.382014	2.00648	0.0448051	0.999687	Rnf34
ENSMUSG00000029780	2857.79	1.01445	0.506991	2.00093	0.0453996	0.999687	Nt5c3
ENSMUSG00000039396	82.4332	0.762718	0.382889	1.99201	0.04637	0.999687	Neil3
ENSMUSG00000034906	25.9597	1.15888	0.583278	1.98684	0.04694	0.999687	Ncaph
ENSMUSG00000072872	181.517	-0.776956	0.391091	-1.98664	0.0469625	0.999687	Rybp
ENSMUSG00000001014	2.33006	3.31469	1.66957	1.98535	0.0471054	0.999687	Icam4
ENSMUSG00000028108	782.764	0.607137	0.306099	1.98347	0.047315	0.999687	Ecm1
ENSMUSG00000074802	103.698	1.08446	0.547404	1.9811	0.0475805	0.999687	Gas2l3
ENSMUSG00000029090	11.7906	2.18315	1.10293	1.9794	0.0477709	0.999687	Adgra3
ENSMUSG00000045973	14358.5	0.799457	0.404406	1.97687	0.0480567	0.999687	Slc25a51
ENSMUSG00000026150	1972.9	0.940568	0.476168	1.97529	0.0482357	0.999687	Mff
ENSMUSG00000058624	33822.2	0.829932	0.421156	1.97061	0.048769	0.999687	Gda
ENSMUSG00000037818	94.2442	0.759607	0.385521	1.97034	0.0487996	0.999687	Abhd18
ENSMUSG00000030588	23.6372	-1.06062	0.539289	-1.9667	0.0492181	0.999687	Yif1b
ENSMUSG00000032869	896.857	0.995776	0.506706	1.9652	0.0493916	0.999687	Psmf1
ENSMUSG00000040009	260.58	0.586143	0.298333	1.96473	0.0494459	0.999687	Gnaz
ENSMUSG00000075023	4.45425	2.18622	1.1142	1.96215	0.0497454	0.999687	Accsl
ENSMUSG00000068014	2.0716	4.20379	2.14343	1.96125	0.0498504	0.999687	Gm14648
ENSMUSG00000042581	14.2206	1.29575	0.66087	1.96067	0.0499176	0.999687	Thsd7b

## Sheet: Adrenal Male (p<0.05)
	baseMean	log2FoldChange	lfcSE	stat	pvalue	padj	symbol
ENSMUSG00000116461	10.4431	-6.48007	1.46216	-4.43184	9.3432e-06	0.08553	Gm44502
ENSMUSG00000091071	50.8021	3.60958	0.820801	4.39763	1.0944e-05	0.08553	NA
ENSMUSG00000106715	10.553	-6.51624	1.50147	-4.3399	1.4255e-05	0.08553	Tmem265
ENSMUSG00000043857	46.0298	1.87551	0.46059	4.07197	4.66175e-05	0.209779	Mgat5b
ENSMUSG00000030111	136.489	-1.70358	0.429214	-3.96907	7.21539e-05	0.24852	A2m
ENSMUSG00000103800	17.2189	3.10783	0.793325	3.91747	8.94814e-05	0.24852	Pcdha8
ENSMUSG00000029417	46.3256	1.97149	0.509762	3.86748	0.000109966	0.24852	Cxcl9
ENSMUSG00000112241	49.4157	1.93193	0.499672	3.8664	0.000110453	0.24852	NA
ENSMUSG00000095642	7.72872	5.70301	1.49142	3.82389	0.000131363	0.260134	Ighv14-3
ENSMUSG00000096764	6.73239	-5.85195	1.54	-3.79995	0.000144723	0.260134	Slc12a6
ENSMUSG00000050397	15.8609	-6.10761	1.61721	-3.77662	0.000158971	0.260134	Foxl2
ENSMUSG00000083012	28.4635	2.97471	0.793125	3.75061	0.000176402	0.264603	Fam220a
ENSMUSG00000091655	6.30313	-5.76159	1.55597	-3.70289	0.000213161	0.295146	NA
ENSMUSG00000029093	595.219	-0.839248	0.23434	-3.58133	0.000341856	0.439529	Sorcs2
ENSMUSG00000016028	66.0338	-1.78194	0.509005	-3.50083	0.000463818	0.509683	Celsr1
ENSMUSG00000114133	15.4786	-4.18765	1.1969	-3.49874	0.000467454	0.509683	Btf3l4b
ENSMUSG00000050447	149.372	-1.43361	0.410669	-3.49092	0.000481367	0.509683	Lypd6
ENSMUSG00000007827	294.409	1.08503	0.31927	3.39846	0.000677669	0.600312	Ankrd26
ENSMUSG00000061533	172.551	0.995583	0.293284	3.39461	0.000687272	0.600312	Cep128
ENSMUSG00000027694	25.4822	-7.77784	2.2992	-3.38284	0.000717404	0.600312	NA
ENSMUSG00000042961	308.158	-0.835294	0.247511	-3.37478	0.000738752	0.600312	Egflam
ENSMUSG00000020542	29.029	-2.12611	0.63001	-3.37472	0.00073892	0.600312	Myocd
ENSMUSG00000028186	16.0439	3.75548	1.11846	3.35774	0.000785834	0.600312	Uox
ENSMUSG00000097993	16.1314	-3.22005	0.960448	-3.35265	0.000800416	0.600312	Ptprv
ENSMUSG00000042606	137.238	1.11527	0.33692	3.31018	0.000932354	0.671295	Hirip3
ENSMUSG00000029602	98.253	-1.35451	0.417814	-3.24188	0.00118742	0.805172	Rasal1
ENSMUSG00000073650	10.1055	2.67307	0.827268	3.2312	0.00123271	0.805172	Catip
ENSMUSG00000028354	365.604	0.810649	0.251343	3.22527	0.00125853	0.805172	Fmn2
ENSMUSG00000032181	1055.03	0.919359	0.285818	3.21659	0.00129722	0.805172	Scg3
ENSMUSG00000036192	185.325	1.40473	0.438652	3.20238	0.00136299	0.817796	Rorb
ENSMUSG00000035270	29.6218	2.35294	0.739386	3.18229	0.00146115	0.848409	Impg2
ENSMUSG00000002699	185.015	-1.23902	0.392932	-3.15326	0.00161457	0.852546	Lcp2
ENSMUSG00000067919	8.38158	6.03396	1.91477	3.15128	0.00162558	0.852546	Rex2
ENSMUSG00000022070	156.313	1.12627	0.358768	3.13926	0.00169374	0.852546	Bora
ENSMUSG00000066687	1113.98	0.650866	0.207501	3.13668	0.00170871	0.852546	Zbtb16
ENSMUSG00000042254	167.873	-0.894495	0.285652	-3.13141	0.00173968	0.852546	Cilp
ENSMUSG00000101523	5.0515	-5.44382	1.73965	-3.12926	0.00175246	0.852546	Csnk2a1-ps3
ENSMUSG00000000305	408.433	0.879046	0.285136	3.0829	0.00204997	0.971039	Cdh4
ENSMUSG00000024731	17.329	-3.11634	1.02194	-3.04944	0.00229272	0.99942	Ms4a10
ENSMUSG00000037958	233.865	0.875042	0.291366	3.00324	0.00267121	0.99942	Nsrp1
ENSMUSG00000027111	3561.82	-0.568654	0.189758	-2.99674	0.00272882	0.99942	Itga6
ENSMUSG00000089960	34.1011	-3.05807	1.02744	-2.9764	0.00291652	0.99942	Ugt1a1
ENSMUSG00000083396	30.269	1.86312	0.633411	2.94141	0.00326725	0.99942	Gm15542
ENSMUSG00000029231	2294.95	-0.590709	0.200952	-2.93956	0.00328678	0.99942	Pdgfra
ENSMUSG00000038535	1426.34	1.01549	0.349165	2.90834	0.00363349	0.99942	Zfp280d
ENSMUSG00000026837	1858.1	-0.578494	0.198961	-2.90757	0.00364245	0.99942	Col5a1
ENSMUSG00000031451	2870.27	-1.08452	0.373185	-2.90611	0.00365947	0.99942	Gas6
ENSMUSG00000070371	56.5266	-1.30333	0.450744	-2.89151	0.00383397	0.99942	Prss36
ENSMUSG00000069917	25.7566	1.86838	0.648025	2.8832	0.00393659	0.99942	Hba-a2
ENSMUSG00000031258	88.1018	1.83317	0.64249	2.85322	0.00432783	0.99942	Xkrx
ENSMUSG00000110195	4307.13	-0.633941	0.222414	-2.85028	0.0043681	0.99942	Pde2a
ENSMUSG00000035476	522.178	0.619986	0.218031	2.84356	0.00446126	0.99942	Tab3
ENSMUSG00000073427	150.462	1.01871	0.358468	2.84185	0.00448532	0.99942	Gm4924
ENSMUSG00000040026	448.571	1.0189	0.360182	2.82884	0.00467169	0.99942	Saa3
ENSMUSG00000075014	56.0713	4.05115	1.43414	2.82479	0.00473112	0.99942	NA
ENSMUSG00000020695	935.803	-0.5731	0.202955	-2.82377	0.00474622	0.99942	Mrc2
ENSMUSG00000025056	78.6828	-1.85077	0.656764	-2.81801	0.00483221	0.99942	Nr0b1
ENSMUSG00000039178	470.791	0.612047	0.217256	2.81717	0.00484492	0.99942	Tbc1d19
ENSMUSG00000040152	615.748	-0.852228	0.30256	-2.81673	0.00485158	0.99942	Thbs1
ENSMUSG00000029070	813.628	-0.689725	0.245254	-2.81229	0.00491897	0.99942	Mxra8
ENSMUSG00000032356	1537	0.859542	0.307042	2.79942	0.00511938	0.99942	Rasgrf1
ENSMUSG00000098934	89.7679	1.66586	0.597689	2.78718	0.00531692	0.99942	Gvin-ps4
ENSMUSG00000016756	542.47	1.09088	0.39179	2.78436	0.00536343	0.99942	Cmah
ENSMUSG00000069378	4.69685	-5.34153	1.92181	-2.77943	0.00544545	0.99942	Prdm6
ENSMUSG00000102206	59.2341	1.23092	0.442998	2.7786	0.00545933	0.99942	Pcdha11
ENSMUSG00000031273	60.0846	-1.26369	0.455382	-2.77501	0.00551993	0.99942	Col4a6
ENSMUSG00000094708	210.938	-10.826	3.90694	-2.77097	0.00558891	0.99942	Gm10359
ENSMUSG00000075015	15.2624	3.1937	1.15372	2.76819	0.00563693	0.99942	NA
ENSMUSG00000017146	73.7086	1.76663	0.638437	2.76712	0.00565547	0.99942	Brca1
ENSMUSG00000095186	40.5917	2.11877	0.767802	2.75953	0.00578851	0.99942	NA
ENSMUSG00000032085	772.923	-0.623568	0.226308	-2.75539	0.00586218	0.99942	Tagln
ENSMUSG00000028681	185.479	-1.00899	0.366196	-2.75532	0.00586349	0.99942	Ptch2
ENSMUSG00000028364	566.571	-0.951249	0.345346	-2.75448	0.00587852	0.99942	Tnc
ENSMUSG00000105549	262.609	0.994299	0.361739	2.74867	0.00598383	0.99942	NA
ENSMUSG00000044645	163.575	-1.15997	0.422188	-2.74753	0.00600465	0.99942	NA
ENSMUSG00000089756	613.804	0.708419	0.258488	2.74062	0.00613235	0.99942	Zfp966
ENSMUSG00000074476	1173.52	0.900571	0.329341	2.73446	0.00624819	0.99942	Spc24
ENSMUSG00000027840	615.02	-0.948151	0.347273	-2.73028	0.00632813	0.99942	Wnt2b
ENSMUSG00000023046	317.197	-0.884809	0.324728	-2.72477	0.00643468	0.99942	Igfbp6
ENSMUSG00000057604	83.9946	-0.908695	0.334033	-2.72037	0.00652089	0.99942	Lmcd1
ENSMUSG00000066270	2.91262	5.30817	1.9523	2.71892	0.00654945	0.99942	NA
ENSMUSG00000022504	205.79	-0.829967	0.306741	-2.70576	0.00681482	0.99942	Ciita
ENSMUSG00000020135	416.008	0.769923	0.285342	2.69825	0.00697048	0.99942	Apc2
ENSMUSG00000093894	7.29145	-5.02587	1.86275	-2.69809	0.00697387	0.99942	Ighv1-53
ENSMUSG00000040809	33.9362	-2.05591	0.763508	-2.69272	0.00708714	0.99942	Chil3
ENSMUSG00000041078	40.8666	1.34741	0.500423	2.69254	0.00709099	0.99942	Grid1
ENSMUSG00000001496	97.6584	1.13645	0.424238	2.67881	0.00738851	0.99942	Nkx2-1
ENSMUSG00000054162	228.371	0.781054	0.291643	2.67812	0.00740378	0.99942	Spock3
ENSMUSG00000018168	45.1177	-1.28009	0.478124	-2.67733	0.00742122	0.99942	Ikzf3
ENSMUSG00000027254	1465.31	0.757894	0.283314	2.6751	0.00747075	0.99942	Map1a
ENSMUSG00000057751	93.92	-1.3926	0.522333	-2.66612	0.00767315	0.99942	Megf6
ENSMUSG00000035769	48.4147	1.18937	0.446832	2.66178	0.00777278	0.99942	Xylb
ENSMUSG00000057335	1409.37	0.553295	0.208215	2.65733	0.00787629	0.99942	Cep170
ENSMUSG00000020843	302.235	-0.716366	0.2696	-2.65715	0.00788046	0.99942	Timm22
ENSMUSG00000043572	101.162	-0.930557	0.350256	-2.65679	0.00788879	0.99942	Pars2
ENSMUSG00000023972	194.384	-0.775703	0.291987	-2.65664	0.00789238	0.99942	Ptk7
ENSMUSG00000021684	834.541	-0.789805	0.297452	-2.65523	0.00792538	0.99942	Pde8b
ENSMUSG00000074158	265.272	0.615214	0.234032	2.62876	0.00856974	0.99942	Zfp976
ENSMUSG00000029145	243.675	0.61458	0.234547	2.62029	0.00878562	0.99942	Eif2b4
ENSMUSG00000071679	267.17	0.853889	0.326643	2.61413	0.00894541	0.99942	Rtl4
ENSMUSG00000043017	65.1652	-0.958387	0.367217	-2.60987	0.00905778	0.99942	Ptgir
ENSMUSG00000073876	5.03842	-3.17861	1.21933	-2.60685	0.00913797	0.99942	Gm13305
ENSMUSG00000085925	443.352	0.73856	0.283343	2.60659	0.00914485	0.99942	Rtl1
ENSMUSG00000037995	78.217	-1.05432	0.404685	-2.60529	0.00917969	0.99942	Igsf9
ENSMUSG00000026344	199.325	-0.882817	0.339578	-2.59975	0.00932919	0.99942	Lypd1
ENSMUSG00000034295	522.606	0.550136	0.211625	2.59958	0.00933385	0.99942	Fhod3
ENSMUSG00000113395	310.598	0.692802	0.266636	2.5983	0.00936853	0.99942	NA
ENSMUSG00000094669	9.60897	2.83631	1.09461	2.59117	0.00956505	0.99942	Olfr441
ENSMUSG00000056004	907.128	0.611399	0.2362	2.58848	0.00963999	0.99942	Elapor2
ENSMUSG00000071226	249.41	0.730992	0.282881	2.5841	0.00976343	0.99942	Cecr2
ENSMUSG00000029219	272.517	0.795146	0.308255	2.57951	0.00989409	0.99942	Slc10a4
ENSMUSG00000034730	175.469	0.8962	0.347788	2.57686	0.00997021	0.99942	Adgrb1
ENSMUSG00000095079	162.548	1.13465	0.441177	2.57187	0.010115	0.99942	Igha
ENSMUSG00000043099	254.517	-0.807703	0.314165	-2.57095	0.0101419	0.99942	Hic1
ENSMUSG00000028919	684.342	-0.718062	0.280326	-2.56152	0.0104216	0.99942	Arhgef19
ENSMUSG00000014782	19.1818	2.8635	1.11955	2.55773	0.0105358	0.99942	Plekhg4
ENSMUSG00000020953	10.3953	-2.86432	1.12125	-2.55459	0.0106314	0.99942	Coch
ENSMUSG00000030748	1186.49	-0.885316	0.346609	-2.55422	0.0106425	0.99942	Il4ra
ENSMUSG00000061298	52.5386	1.16381	0.455805	2.55331	0.0106705	0.99942	Agbl4
ENSMUSG00000025777	392.806	0.654783	0.256534	2.55242	0.0106977	0.99942	Gdap1
ENSMUSG00000032497	585.398	0.56086	0.219768	2.55206	0.0107089	0.99942	Lrrfip2
ENSMUSG00000034311	15.0894	-1.81427	0.711677	-2.54929	0.0107942	0.99942	Kif4
ENSMUSG00000031821	37.1008	-1.38043	0.543387	-2.54042	0.0110718	0.99942	Gins2
ENSMUSG00000074733	1311.54	0.545934	0.215158	2.53737	0.011169	0.99942	Zfp950
ENSMUSG00000025650	89.8432	0.965451	0.381119	2.5332	0.0113025	0.99942	Col7a1
ENSMUSG00000035864	1695.34	0.682666	0.269951	2.52885	0.0114438	0.99942	Syt1
ENSMUSG00000026641	507.176	-0.704828	0.27878	-2.52826	0.011463	0.99942	Usf1
ENSMUSG00000067215	47.6645	1.1473	0.453801	2.5282	0.0114648	0.99942	Usp51
ENSMUSG00000034349	799.918	0.579426	0.229474	2.52502	0.0115691	0.99942	Smc4
ENSMUSG00000037138	167.047	-0.855881	0.339082	-2.52411	0.0115991	0.99942	Aff3
ENSMUSG00000101397	3.06786	4.6236	1.83199	2.52381	0.0116089	0.99942	Mug-ps1
ENSMUSG00000097412	81.9562	-1.04262	0.413185	-2.52337	0.0116235	0.99942	1810014B01Rik
ENSMUSG00000033849	649.311	0.949539	0.376304	2.52333	0.011625	0.99942	B3galt2
ENSMUSG00000079597	27.8164	1.68734	0.669448	2.52049	0.0117191	0.99942	Cstdc4
ENSMUSG00000035783	447.293	-0.753319	0.299406	-2.51604	0.011868	0.99942	Acta2
ENSMUSG00000039509	480.726	-0.553592	0.220144	-2.51468	0.011914	0.99942	Nup133
ENSMUSG00000046169	282.925	0.688566	0.273859	2.51431	0.0119265	0.99942	Adamts6
ENSMUSG00000021944	53.5132	-1.55817	0.61992	-2.5135	0.0119539	0.99942	Gata4
ENSMUSG00000070337	377.763	0.750874	0.298919	2.51196	0.0120062	0.99942	Gpr179
ENSMUSG00000020758	279.634	-1.00147	0.398729	-2.51165	0.012017	0.99942	Itgb4
ENSMUSG00000095547	30.8444	2.06339	0.823403	2.50593	0.012213	0.99942	NA
ENSMUSG00000028527	362.952	0.66266	0.264672	2.5037	0.0122901	0.99942	Ak4
ENSMUSG00000095294	49.4764	1.17923	0.471462	2.50122	0.0123767	0.99942	Potefam3b
ENSMUSG00000063200	373.705	0.620042	0.247987	2.5003	0.0124088	0.99942	Nol7
ENSMUSG00000032572	13.5994	-2.75742	1.10352	-2.49875	0.0124631	0.99942	Col6a4
ENSMUSG00000021822	280.643	-0.723392	0.289942	-2.49495	0.0125975	0.99942	Plau
ENSMUSG00000036916	357.664	0.530783	0.21286	2.49358	0.0126463	0.99942	Zfp280c
ENSMUSG00000052581	165.583	0.798968	0.320536	2.4926	0.0126811	0.99942	Lrrtm4
ENSMUSG00000096519	12.0395	2.34955	0.944122	2.48861	0.0128244	0.99942	NA
ENSMUSG00000038524	167.1	-0.694193	0.279291	-2.48555	0.012935	0.99942	Fchsd1
ENSMUSG00000042388	274.141	0.713444	0.287375	2.48262	0.0130419	0.99942	Dlgap3
ENSMUSG00000037784	154.106	-0.734848	0.296151	-2.48133	0.0130892	0.99942	Dzip1l
ENSMUSG00000060257	12.749	2.38025	0.961683	2.47508	0.0133205	0.99942	Scrt2
ENSMUSG00000030862	737.656	-0.780743	0.315945	-2.47114	0.0134685	0.99942	Cpxm2
ENSMUSG00000101122	30.5247	1.76983	0.717244	2.46755	0.0136042	0.99942	Gm17971
ENSMUSG00000040950	72.9745	-1.01552	0.411653	-2.46693	0.0136276	0.99942	Mgl2
ENSMUSG00000050473	652.345	0.639408	0.259193	2.46692	0.0136281	0.99942	Slc35d3
ENSMUSG00000064370	105506	1.14157	0.462934	2.46593	0.0136657	0.99942	CYTB
ENSMUSG00000037475	1811.58	0.483845	0.196256	2.46537	0.013687	0.99942	Thoc2
ENSMUSG00000056222	1105.37	0.625708	0.2541	2.46245	0.0137993	0.99942	Spock1
ENSMUSG00000040653	41.9608	-1.32124	0.536562	-2.46241	0.0138007	0.99942	Ppp1r14c
ENSMUSG00000070853	28.014	1.68436	0.684722	2.45992	0.0138966	0.99942	NA
ENSMUSG00000031486	800.014	-0.676392	0.275255	-2.45733	0.0139975	0.99942	Adgra2
ENSMUSG00000021948	1343.34	-0.591329	0.240988	-2.45377	0.0141366	0.99942	Prkcd
ENSMUSG00000031343	626.993	-0.478999	0.195221	-2.45362	0.0141426	0.99942	Gabra3
ENSMUSG00000046709	276.457	0.801999	0.327002	2.45258	0.0141835	0.99942	Mapk10
ENSMUSG00000026674	1090.77	-0.570497	0.232904	-2.44949	0.0143059	0.99942	Ddr2
ENSMUSG00000084071	3.94498	-5.09942	2.08191	-2.4494	0.0143095	0.99942	Gm13378
ENSMUSG00000028572	358.987	0.69645	0.285539	2.43907	0.0147251	0.99942	Hook1
ENSMUSG00000061461	265.081	-0.676558	0.277648	-2.43674	0.0148202	0.99942	Smim20
ENSMUSG00000046080	39.0765	-1.24153	0.510118	-2.4338	0.0149412	0.99942	Clec9a
ENSMUSG00000046204	113.314	0.945308	0.388742	2.43171	0.0150277	0.99942	Pnma2
ENSMUSG00000002266	104.414	-0.912044	0.37511	-2.4314	0.0150406	0.99942	Zim1
ENSMUSG00000022551	860.542	-0.79126	0.325823	-2.4285	0.0151615	0.99942	Cyc1
ENSMUSG00000095976	12.2483	2.89176	1.19091	2.42819	0.0151744	0.99942	Gm5891
ENSMUSG00000033486	28.8649	1.26356	0.521343	2.42366	0.0153649	0.99942	Catsper2
ENSMUSG00000000948	241.939	0.794236	0.32773	2.42345	0.0153739	0.99942	NA
ENSMUSG00000049648	48.455	1.24626	0.514682	2.42142	0.01546	0.99942	Olfr273
ENSMUSG00000105207	2039.32	1.11682	0.461433	2.42032	0.0155068	0.99942	NA
ENSMUSG00000062061	4.37273	-5.23845	2.1674	-2.41693	0.015652	0.99942	Obp2a
ENSMUSG00000022773	124.347	-0.821198	0.34026	-2.41345	0.0158025	0.99942	Ypel1
ENSMUSG00000024302	405.769	0.537481	0.222828	2.41209	0.0158612	0.99942	Dtna
ENSMUSG00000052305	107.833	3.27816	1.35908	2.41205	0.015863	0.99942	Hbb-b1
ENSMUSG00000096385	12.4219	2.21427	0.91891	2.40967	0.0159669	0.99942	NA
ENSMUSG00000039883	257.48	1.2988	0.53983	2.40593	0.0161312	0.99942	Lrrc17
ENSMUSG00000018909	2408.08	-0.55958	0.232678	-2.40495	0.0161746	0.99942	Arrb1
ENSMUSG00000106379	209.55	0.68657	0.286645	2.39519	0.0166118	0.99942	Lhfpl3
ENSMUSG00000035206	295.329	-0.589249	0.246073	-2.39461	0.0166381	0.99942	Sppl2b
ENSMUSG00000051278	111.713	0.771958	0.322375	2.3946	0.0166385	0.99942	Zgrf1
ENSMUSG00000026874	9.85145	2.96116	1.23734	2.39317	0.0167037	0.99942	Hc
ENSMUSG00000094793	3.39149	5.52814	2.31172	2.39135	0.0167866	0.99942	Mup12
ENSMUSG00000000693	120.936	-0.830523	0.34783	-2.38773	0.0169528	0.99942	Loxl3
ENSMUSG00000026421	1607.72	-0.59363	0.248639	-2.38751	0.0169627	0.99942	Csrp1
ENSMUSG00000114123	1362.57	0.900708	0.377884	2.38356	0.0171462	0.99942	NA
ENSMUSG00000047098	561.27	-0.47323	0.198734	-2.38122	0.0172556	0.99942	Rnf31
ENSMUSG00000051022	96.4274	-0.919674	0.38626	-2.38097	0.0172669	0.99942	Hs3st1
ENSMUSG00000055653	1174.98	-0.780449	0.32782	-2.38072	0.0172787	0.99942	Gpc3
ENSMUSG00000071265	230.548	0.687717	0.288888	2.38057	0.017286	0.99942	1700086L19Rik
ENSMUSG00000062184	97.6787	-1.10758	0.465353	-2.38009	0.0173082	0.99942	Hs6st2
ENSMUSG00000116594	13.5006	-2.10222	0.88385	-2.37848	0.0173841	0.99942	NA
ENSMUSG00000071719	235.471	0.620121	0.261531	2.37112	0.0177342	0.99942	Nalf2
ENSMUSG00000074527	332.633	0.794314	0.335176	2.36984	0.0177958	0.99942	Gm14296
ENSMUSG00000091183	145.445	0.764825	0.323484	2.36433	0.0180626	0.99942	Gm5141
ENSMUSG00000003929	393.068	0.536098	0.226887	2.36284	0.0181356	0.99942	Zfp81
ENSMUSG00000064357	121687	1.04646	0.442987	2.36228	0.0181628	0.99942	ATP6
ENSMUSG00000020696	170.287	-0.661984	0.280334	-2.36142	0.0182053	0.99942	Rffl
ENSMUSG00000026374	1370.27	-0.673958	0.285521	-2.36045	0.0182528	0.99942	Tsn
ENSMUSG00000032724	300.017	-1.08057	0.457814	-2.36027	0.0182615	0.99942	Abtb2
ENSMUSG00000044646	116.605	-0.674174	0.285695	-2.35977	0.0182862	0.99942	Zbtb7c
ENSMUSG00000056900	78.3408	-0.920795	0.390261	-2.35944	0.0183027	0.99942	Usp13
ENSMUSG00000030707	242.161	-0.931641	0.395077	-2.35813	0.0183673	0.99942	Coro1a
ENSMUSG00000038916	322.238	0.951898	0.403752	2.35763	0.0183921	0.99942	Soga3
ENSMUSG00000046743	1335.77	-0.558353	0.237098	-2.35494	0.0185254	0.99942	Fat4
ENSMUSG00000060962	129.464	0.811495	0.345187	2.35089	0.0187288	0.99942	Dmkn
ENSMUSG00000028926	586.913	0.568524	0.242087	2.34842	0.0188531	0.99942	Cdk14
ENSMUSG00000026950	46.6199	-1.66644	0.71012	-2.3467	0.0189407	0.99942	Neb
ENSMUSG00000045826	14.681	-1.63999	0.699029	-2.34609	0.0189713	0.99942	Ptprcap
ENSMUSG00000061080	1207.2	0.763807	0.325693	2.34517	0.0190182	0.99942	Lsamp
ENSMUSG00000024330	12.6918	1.75147	0.74743	2.34332	0.0191131	0.99942	Col11a2
ENSMUSG00000063273	1929.24	0.567601	0.242304	2.34252	0.019154	0.99942	Naa15
ENSMUSG00000047844	100.69	0.939057	0.400877	2.34251	0.0191547	0.99942	Bex4
ENSMUSG00000048621	25.9364	1.32928	0.567943	2.34052	0.019257	0.99942	Gm6377
ENSMUSG00000023336	140.161	-0.7011	0.299611	-2.34003	0.019282	0.99942	Wfdc1
ENSMUSG00000117340	3.98963	5.77977	2.47031	2.33969	0.0192996	0.99942	NA
ENSMUSG00000021638	58.3303	-1.28385	0.549438	-2.33665	0.0194573	0.99942	Ocln
ENSMUSG00000032482	273.764	-0.566526	0.242769	-2.3336	0.0196165	0.99942	Cspg5
ENSMUSG00000064354	3418.21	2.19398	0.940232	2.33345	0.0196247	0.99942	COX2
ENSMUSG00000061816	36.4119	1.50901	0.647211	2.33156	0.0197239	0.99942	Myl1
ENSMUSG00000026064	155.785	1.20424	0.516684	2.3307	0.0197691	0.99942	Ptp4a1
ENSMUSG00000022820	297.77	0.65484	0.281096	2.3296	0.0198275	0.99942	Ndufb4
ENSMUSG00000002930	178.092	0.626373	0.269083	2.32781	0.0199223	0.99942	Ppp1r17
ENSMUSG00000041550	16.0968	-1.71861	0.739382	-2.32439	0.0201045	0.99942	Serpina5
ENSMUSG00000096108	4.2725	-5.21526	2.24663	-2.32137	0.0202668	0.99942	Ighv11-2
ENSMUSG00000041491	218.821	0.561279	0.241828	2.32098	0.020288	0.99942	Cep78
ENSMUSG00000056073	387.891	0.737112	0.317938	2.31842	0.0204267	0.99942	Grik2
ENSMUSG00000075069	210.099	1.04143	0.449482	2.31695	0.0205067	0.99942	Olfr1264
ENSMUSG00000117333	70.3913	1.27892	0.55225	2.31584	0.0205671	0.99942	NA
ENSMUSG00000057182	560.293	0.692055	0.298966	2.31483	0.0206224	0.99942	Scn3a
ENSMUSG00000073435	220.902	-0.813706	0.351595	-2.31432	0.02065	0.99942	Nme3
ENSMUSG00000020388	159.286	-0.703639	0.3042	-2.31308	0.0207182	0.99942	Pdlim4
ENSMUSG00000027469	42.9273	-1.12502	0.486638	-2.31182	0.0207874	0.99942	Tpx2
ENSMUSG00000022562	576.849	-0.613725	0.265752	-2.30939	0.0209221	0.99942	Oplah
ENSMUSG00000026527	186.051	0.595758	0.258052	2.30868	0.0209615	0.99942	Rgs7
ENSMUSG00000021963	718.143	-0.822403	0.356279	-2.30831	0.0209817	0.99942	Sap18
ENSMUSG00000076614	38.6461	-5.83581	2.52892	-2.30763	0.0210197	0.99942	NA
ENSMUSG00000031965	2468.87	0.900144	0.390226	2.30672	0.0210703	0.99942	Tbx20
ENSMUSG00000032327	34.2751	-1.16871	0.506662	-2.30668	0.0210724	0.99942	Stra6
ENSMUSG00000102070	85785.4	0.979654	0.424937	2.30541	0.0211437	0.99942	NA
ENSMUSG00000000957	1014.16	-0.424548	0.184223	-2.30453	0.0211929	0.99942	Mmp14
ENSMUSG00000053693	257.6	0.697378	0.302914	2.30223	0.0213221	0.99942	Mast1
ENSMUSG00000068748	318.951	0.734954	0.319324	2.30159	0.0213583	0.99942	Ptprz1
ENSMUSG00000026678	1645.93	0.657272	0.285646	2.301	0.0213917	0.99942	Rgs5
ENSMUSG00000071547	616.244	0.511434	0.222417	2.29943	0.0214804	0.99942	Nt5dc2
ENSMUSG00000030980	931.39	-0.601331	0.261552	-2.29909	0.0214998	0.99942	Knop1
ENSMUSG00000091749	3.08509	4.47983	1.94914	2.29836	0.0215414	0.99942	Tspy-ps
ENSMUSG00000102758	338.194	-0.659139	0.286927	-2.29723	0.0216055	0.99942	Naaladl2
ENSMUSG00000029364	1507.91	-0.490866	0.213819	-2.29571	0.0216923	0.99942	Wsb2
ENSMUSG00000024063	1614.57	-0.46334	0.201891	-2.295	0.0217333	0.99942	Lbh
ENSMUSG00000073877	60.9282	1.03183	0.44968	2.29458	0.0217574	0.99942	Gm13306
ENSMUSG00000114277	25.7765	1.36863	0.59675	2.29347	0.0218211	0.99942	NA
ENSMUSG00000062209	40.9925	1.20932	0.527293	2.29345	0.0218221	0.99942	Erbb4
ENSMUSG00000090958	620.361	-0.626084	0.27327	-2.29108	0.0219588	0.99942	Lrrc32
ENSMUSG00000026589	82.0111	1.22311	0.533864	2.29104	0.0219608	0.99942	Sec16b
ENSMUSG00000015970	161.016	0.904809	0.395234	2.2893	0.0220619	0.99942	Chdh
ENSMUSG00000028134	858.756	0.501425	0.219357	2.28589	0.0222608	0.99942	Ptbp2
ENSMUSG00000112101	591.983	0.629584	0.27549	2.28533	0.0222936	0.99942	NA
ENSMUSG00000020865	346.087	-0.568738	0.249189	-2.28235	0.0224686	0.99942	Abcc3
ENSMUSG00000084838	144.976	-0.839054	0.367663	-2.28213	0.0224818	0.99942	NA
ENSMUSG00000020530	1093.38	0.525366	0.230522	2.27903	0.0226656	0.99942	Ggnbp2
ENSMUSG00000048138	21.4597	2.43326	1.06963	2.27487	0.0229138	0.99942	Dmrt2
ENSMUSG00000020902	862.288	-0.659755	0.290258	-2.273	0.0230264	0.99942	Ntn1
ENSMUSG00000095730	55.6888	1.56457	0.688487	2.27248	0.0230574	0.99942	Vmn2r29
ENSMUSG00000046562	762.467	-0.509704	0.224431	-2.2711	0.0231411	0.99942	Unc119b
ENSMUSG00000039372	47.9889	1.05411	0.464572	2.269	0.0232681	0.99942	Marchf4
ENSMUSG00000031740	240.407	-0.683692	0.301431	-2.26816	0.0233196	0.99942	Mmp2
ENSMUSG00000036526	66.4455	-0.86814	0.383208	-2.26545	0.0234849	0.99942	Card11
ENSMUSG00000057440	430.973	0.493294	0.217772	2.26519	0.0235012	0.99942	Mpp7
ENSMUSG00000113961	761	0.980245	0.432921	2.26426	0.0235581	0.99942	NA
ENSMUSG00000006611	529.663	-0.57998	0.256373	-2.26226	0.0236816	0.99942	Hfe
ENSMUSG00000045103	1207.57	-0.475018	0.210038	-2.26158	0.0237233	0.99942	Dmd
ENSMUSG00000031661	818.815	-0.529033	0.234001	-2.26081	0.0237709	0.99942	Nkd1
ENSMUSG00000026608	1043.09	1.02309	0.452634	2.26031	0.0238022	0.99942	Kctd3
ENSMUSG00000025407	132.243	-0.827247	0.366443	-2.2575	0.0239767	0.99942	Gli1
ENSMUSG00000051041	170.603	-0.688101	0.304815	-2.25744	0.0239806	0.99942	Olfml1
ENSMUSG00000030403	715.618	-0.534127	0.236621	-2.2573	0.023989	0.99942	Vasp
ENSMUSG00000019853	45.9755	1.0135	0.449003	2.25722	0.0239943	0.99942	Hebp2
ENSMUSG00000020638	380.384	-0.618251	0.274438	-2.25279	0.0242724	0.99942	Cmpk2
ENSMUSG00000024039	99.0255	1.48107	0.658162	2.25031	0.0244293	0.99942	Cbs
ENSMUSG00000029720	209.197	-0.799306	0.355283	-2.24977	0.0244636	0.99942	NA
ENSMUSG00000098112	103.23	-0.855291	0.380618	-2.24711	0.0246329	0.99942	Bin2
ENSMUSG00000032311	56.8786	1.72564	0.768437	2.24565	0.0247266	0.99942	Nrg4
ENSMUSG00000017664	512.039	-0.479375	0.213573	-2.24455	0.0247974	0.99942	Slc35c2
ENSMUSG00000063564	98.9364	-0.82692	0.368787	-2.24227	0.024944	0.99942	Col23a1
ENSMUSG00000091631	172.465	1.03749	0.462786	2.24183	0.0249721	0.99942	Vmn2r95
ENSMUSG00000037902	1995.9	-0.400689	0.178735	-2.2418	0.0249745	0.99942	Sirpa
ENSMUSG00000029864	476.886	-0.914135	0.407834	-2.24144	0.0249975	0.99942	Gstk1
ENSMUSG00000054065	23.3269	1.33734	0.597141	2.23958	0.0251183	0.99942	Pkp3
ENSMUSG00000028455	551.462	-0.802907	0.358607	-2.23896	0.0251584	0.99942	Stoml2
ENSMUSG00000016386	498.738	0.669031	0.298928	2.2381	0.0252145	0.99942	Mpped2
ENSMUSG00000025658	1006.92	0.692578	0.309587	2.2371	0.0252797	0.99942	Cnksr2
ENSMUSG00000026770	444.932	1.08338	0.485038	2.23361	0.025509	0.99942	Il2ra
ENSMUSG00000071658	311.132	0.877907	0.393089	2.23335	0.0255258	0.99942	Gng3
ENSMUSG00000038775	50.0755	-0.997669	0.446925	-2.2323	0.0255953	0.99942	Vill
ENSMUSG00000027878	3185.44	-0.470259	0.210787	-2.23097	0.0256832	0.99942	Notch2
ENSMUSG00000046658	349.513	-0.510735	0.228967	-2.23061	0.0257072	0.99942	Zfp316
ENSMUSG00000020128	1036.88	0.450411	0.201995	2.22981	0.0257598	0.99942	Vps54
ENSMUSG00000045680	195.486	-0.546392	0.245253	-2.22787	0.0258889	0.99942	Tcf21
ENSMUSG00000021466	2873.16	-0.552393	0.247995	-2.22744	0.0259181	0.99942	Ptch1
ENSMUSG00000062727	33.6386	-1.50288	0.675121	-2.2261	0.0260077	0.99942	H2bc12
ENSMUSG00000080186	2.56326	5.14577	2.31185	2.22582	0.0260262	0.99942	NA
ENSMUSG00000024502	557.382	0.858581	0.385752	2.22573	0.0260321	0.99942	Jakmip2
ENSMUSG00000030737	850.739	-0.526879	0.236892	-2.22413	0.0261394	0.99942	Slco2b1
ENSMUSG00000051502	93.7571	0.718156	0.323212	2.22194	0.0262876	0.99942	Ufsp1
ENSMUSG00000072623	444.159	0.582488	0.26221	2.22146	0.0263201	0.99942	Zfp9
ENSMUSG00000030579	365.953	-0.77549	0.349218	-2.22065	0.0263748	0.99942	Tyrobp
ENSMUSG00000063730	619.361	0.678912	0.305952	2.21901	0.0264857	0.99942	Hsd3b2
ENSMUSG00000054422	7.67956	2.7239	1.22796	2.21824	0.0265383	0.99942	Fabp1
ENSMUSG00000068015	693.991	0.92523	0.417663	2.21526	0.0267425	0.99942	Lrch1
ENSMUSG00000031825	597.041	-0.601055	0.271461	-2.21415	0.0268184	0.99942	Crispld2
ENSMUSG00000029925	168.128	-0.627529	0.283435	-2.21402	0.0268277	0.99942	Tbxas1
ENSMUSG00000034584	69.5214	0.907948	0.410276	2.21302	0.0268962	0.99942	Exph5
ENSMUSG00000076532	2.60654	5.16588	2.33516	2.21222	0.0269517	0.99942	Igkv4-91
ENSMUSG00000049130	201.198	-0.549733	0.2486	-2.21132	0.027014	0.99942	C5ar1
ENSMUSG00000033083	1761.81	-0.540799	0.244595	-2.211	0.0270357	0.99942	Tbc1d4
ENSMUSG00000015243	7579.95	-0.641312	0.290063	-2.21094	0.0270399	0.99942	Abca1
ENSMUSG00000075312	19.1997	1.97552	0.893558	2.21085	0.0270462	0.99942	NA
ENSMUSG00000076655	3.52902	5.6041	2.53655	2.20934	0.027151	0.99942	NA
ENSMUSG00000025184	367.946	0.473615	0.214448	2.20853	0.027207	0.99942	R3hcc1l
ENSMUSG00000057378	133.279	0.66259	0.300069	2.20813	0.0272354	0.99942	Ryr3
ENSMUSG00000042750	251.462	1.0267	0.464982	2.20805	0.027241	0.99942	Bex2
ENSMUSG00000084350	213.243	0.757292	0.343055	2.2075	0.0272795	0.99942	NA
ENSMUSG00000025432	16.2222	1.92813	0.873956	2.2062	0.0273697	0.99942	Avil
ENSMUSG00000090671	38.1097	-1.48313	0.672601	-2.20506	0.0274496	0.99942	NA
ENSMUSG00000110105	139.041	0.793588	0.360344	2.2023	0.0276438	0.99942	Vmn2r29
ENSMUSG00000078902	160.267	0.741255	0.336855	2.20051	0.0277704	0.99942	NA
ENSMUSG00000029580	42331.2	-0.498422	0.226554	-2.20002	0.0278058	0.99942	Actb
ENSMUSG00000042104	705.682	0.533739	0.242757	2.19866	0.0279024	0.99942	Uggt2
ENSMUSG00000026430	397.154	-0.57138	0.259885	-2.19859	0.027907	0.99942	Rassf5
ENSMUSG00000029823	4921.32	0.51554	0.234645	2.19711	0.0280125	0.99942	Luc7l2
ENSMUSG00000029061	64.5871	-0.961794	0.438146	-2.19514	0.0281533	0.99942	Mmp23
ENSMUSG00000066613	356.157	0.509071	0.231932	2.19492	0.0281697	0.99942	Zfp932
ENSMUSG00000112855	143.741	0.849977	0.387708	2.19231	0.0283569	0.99942	NA
ENSMUSG00000067719	27.4157	8.55687	3.90881	2.18912	0.0285879	0.99942	NA
ENSMUSG00000039405	286.525	-0.606273	0.27701	-2.18863	0.0286236	0.99942	Prss23
ENSMUSG00000021461	170.901	-0.689919	0.315237	-2.18857	0.0286278	0.99942	Fancc
ENSMUSG00000067889	159.155	0.777327	0.355251	2.18811	0.0286617	0.99942	Sptbn2
ENSMUSG00000027965	405.478	0.672612	0.30744	2.18778	0.0286857	0.99942	Olfm3
ENSMUSG00000061048	23.5049	-1.35045	0.617407	-2.18729	0.0287214	0.99942	Cdh3
ENSMUSG00000057455	356.411	0.646665	0.29585	2.18578	0.0288314	0.99942	Rit2
ENSMUSG00000068134	333.346	0.509339	0.233533	2.18102	0.0291823	0.99942	Zfp120
ENSMUSG00000082436	2.42316	-4.37766	2.00789	-2.18022	0.0292408	0.99942	NA
ENSMUSG00000043670	112.815	0.703477	0.322848	2.17898	0.0293335	0.99942	Diras1
ENSMUSG00000022762	145.708	0.732745	0.336367	2.17841	0.0293757	0.99942	Ncam2
ENSMUSG00000032584	271.327	-0.541378	0.248569	-2.17798	0.0294075	0.99942	Mst1r
ENSMUSG00000021536	37.0948	-1.06302	0.488218	-2.17734	0.0294549	0.99942	Adcy2
ENSMUSG00000040289	51.3026	1.01524	0.466881	2.17451	0.0296666	0.99942	Hey1
ENSMUSG00000045132	22.4344	1.55384	0.714685	2.17416	0.0296932	0.99942	Olfr620
ENSMUSG00000008540	2678.64	-0.944422	0.435031	-2.17093	0.0299364	0.99942	Mgst1
ENSMUSG00000037697	586.992	0.614217	0.283017	2.17025	0.0299881	0.99942	Ddhd1
ENSMUSG00000044068	754.049	0.689176	0.317657	2.16956	0.0300399	0.99942	Zrsr1
ENSMUSG00000028292	302.791	0.570197	0.262985	2.16817	0.0301454	0.99942	Rars2
ENSMUSG00000093392	5.04557	-3.32583	1.53633	-2.16479	0.0304034	0.99942	NA
ENSMUSG00000036606	4322.7	-0.462954	0.21409	-2.16243	0.0305851	0.99942	Plxnb2
ENSMUSG00000028766	255.737	0.622311	0.287885	2.16167	0.0306437	0.99942	Alpl
ENSMUSG00000028483	518.679	0.571377	0.264363	2.16134	0.0306693	0.99942	Snapc3
ENSMUSG00000022829	200.662	0.620842	0.287416	2.16009	0.030766	0.99942	Stxbp5l
ENSMUSG00000061740	526.21	-0.475765	0.220339	-2.15924	0.0308318	0.99942	Cyp2d22
ENSMUSG00000033981	920.053	0.628647	0.291275	2.15826	0.0309075	0.99942	Gria2
ENSMUSG00000054737	378.747	0.574533	0.266325	2.15726	0.0309851	0.99942	Zfp182
ENSMUSG00000053113	114.782	-0.772063	0.358148	-2.15571	0.0311066	0.99942	Socs3
ENSMUSG00000040016	459.038	0.932428	0.432555	2.15563	0.0311128	0.99942	Ptger3
ENSMUSG00000026854	738.388	0.474364	0.22012	2.15502	0.0311601	0.99942	Usp20
ENSMUSG00000041119	16.2559	1.72375	0.799916	2.15491	0.0311686	0.99942	Pde9a
ENSMUSG00000031862	712.144	-0.458828	0.212969	-2.15443	0.0312065	0.99942	Atp13a1
ENSMUSG00000034463	43.3302	-1.31833	0.612264	-2.15321	0.0313022	0.99942	Scara3
ENSMUSG00000033227	81.7002	-1.06604	0.495375	-2.15198	0.0313989	0.99942	Wnt6
ENSMUSG00000044067	761.485	0.660314	0.307172	2.14966	0.0315823	0.99942	Gpr22
ENSMUSG00000085791	3.33296	5.52176	2.57013	2.14843	0.0316794	0.99942	NA
ENSMUSG00000067786	998.358	0.803152	0.374016	2.14738	0.0317634	0.99942	Nnat
ENSMUSG00000059003	43.6149	-1.20613	0.56182	-2.14682	0.0318076	0.99942	Grin2a
ENSMUSG00000024247	547.476	-1.63092	0.760002	-2.14593	0.0318782	0.99942	Pkdcc
ENSMUSG00000069094	655.009	-0.828175	0.386106	-2.14494	0.0319576	0.99942	Pde7a
ENSMUSG00000039577	102.682	-0.684271	0.319073	-2.14456	0.0319882	0.99942	Nphp4
ENSMUSG00000044150	254.533	0.625181	0.291613	2.14387	0.0320433	0.99942	Bclaf3
ENSMUSG00000029661	2731.14	-0.636995	0.29725	-2.14296	0.0321162	0.99942	Col1a2
ENSMUSG00000032436	237.908	-0.73115	0.34124	-2.14263	0.0321429	0.99942	Cmtm7
ENSMUSG00000028909	1196	-0.607797	0.283864	-2.14116	0.0322614	0.99942	Ptpru
ENSMUSG00000012017	389.214	-0.690989	0.32312	-2.13849	0.0324767	0.99942	Scarf2
ENSMUSG00000094396	128.585	0.927417	0.43401	2.13686	0.0326097	0.99942	Vmn2r124
ENSMUSG00000035355	12.1799	1.64377	0.769998	2.13478	0.0327793	0.99942	Kcnh4
ENSMUSG00000078776	11.5285	1.81861	0.851916	2.13473	0.0327829	0.99942	9530053A07Rik
ENSMUSG00000000440	144.584	1.27243	0.59615	2.1344	0.0328097	0.99942	Pparg
ENSMUSG00000034818	39.6517	1.16697	0.546805	2.13416	0.0328294	0.99942	Celf5
ENSMUSG00000090996	2.41985	5.04848	2.36598	2.13378	0.0328608	0.99942	NA
ENSMUSG00000020102	218.688	-0.804184	0.377024	-2.13298	0.0329263	0.99942	Slc16a7
ENSMUSG00000020649	40.4045	-1.01625	0.476605	-2.13227	0.0329843	0.99942	Rrm2
ENSMUSG00000022629	835.437	0.443681	0.208154	2.1315	0.0330481	0.99942	Kif21a
ENSMUSG00000076498	11.4193	-1.7557	0.825188	-2.12764	0.0333669	0.99942	Trbc2
ENSMUSG00000109540	17.0821	1.53216	0.721174	2.12453	0.0336255	0.99942	NA
ENSMUSG00000031109	225.303	-0.587134	0.27645	-2.12383	0.033684	0.99942	Enox2
ENSMUSG00000111327	185.338	1.05133	0.49523	2.12292	0.0337608	0.99942	NA
ENSMUSG00000015747	294.337	-0.633683	0.298619	-2.12205	0.0338338	0.99942	Vps45
ENSMUSG00000096151	93.2185	0.784698	0.36992	2.12127	0.0338995	0.99942	Olfr477
ENSMUSG00000020608	1119.21	0.472215	0.22269	2.12051	0.0339632	0.99942	Smc6
ENSMUSG00000048126	1524.97	-0.57419	0.271046	-2.11842	0.0341396	0.99942	Col6a3
ENSMUSG00000026043	1889.58	-0.658897	0.31111	-2.11789	0.0341843	0.99942	Col3a1
ENSMUSG00000097392	662.186	0.550774	0.26013	2.1173	0.034234	0.99942	Thoc2l
ENSMUSG00000021265	163.067	-0.830874	0.392563	-2.11653	0.0342995	0.99942	Slc25a29
ENSMUSG00000070605	408.901	0.545687	0.257831	2.11646	0.034306	0.99942	Zfp992
ENSMUSG00000096326	6.39376	4.17103	1.97109	2.1161	0.0343362	0.99942	Ighv1-78
ENSMUSG00000043308	134.838	1.25128	0.591545	2.11527	0.0344069	0.99942	Vmn1r75
ENSMUSG00000022119	1708.53	0.454016	0.214644	2.11521	0.0344124	0.99942	Rbm26
ENSMUSG00000035576	15.572	1.59699	0.755362	2.1142	0.0344981	0.99942	L3mbtl1
ENSMUSG00000029771	231.84	-0.589643	0.279312	-2.11106	0.0347674	0.99942	Irf5
ENSMUSG00000052837	839.129	0.705877	0.334399	2.11088	0.0347827	0.99942	Junb
ENSMUSG00000032586	54.8962	-1.19182	0.564709	-2.11051	0.0348145	0.99942	Traip
ENSMUSG00000063919	230.021	0.641263	0.303913	2.11002	0.0348563	0.99942	Srrm4
ENSMUSG00000090093	347.14	0.670151	0.317821	2.10858	0.0349809	0.99942	Gm14399
ENSMUSG00000050288	190.88	-0.653823	0.31019	-2.10781	0.0350474	0.99942	Fzd2
ENSMUSG00000113232	126.822	1.18578	0.562723	2.10723	0.0350979	0.99942	NA
ENSMUSG00000039982	769.992	-0.487051	0.231286	-2.10584	0.0352182	0.99942	Dtx4
ENSMUSG00000056267	184.127	0.532415	0.252898	2.10526	0.035269	0.99942	Cep70
ENSMUSG00000074676	29.7478	-1.03538	0.491909	-2.10481	0.0353077	0.99942	Foxs1
ENSMUSG00000046807	71.3391	0.814349	0.38696	2.10448	0.0353366	0.99942	Lrrc75b
ENSMUSG00000024965	217.618	-0.589692	0.280421	-2.10288	0.0354763	0.99942	Fermt3
ENSMUSG00000023051	167.497	-0.616311	0.293108	-2.10268	0.0354941	0.99942	Tarbp2
ENSMUSG00000048852	46.221	1.31841	0.6271	2.1024	0.0355186	0.99942	Gm12185
ENSMUSG00000047180	202.036	-0.554932	0.264058	-2.10155	0.0355927	0.99942	Neurl3
ENSMUSG00000019876	307.269	0.68353	0.325251	2.10155	0.0355929	0.99942	Pkib
ENSMUSG00000027350	41437.3	0.897182	0.427255	2.09987	0.03574	0.99942	Chgb
ENSMUSG00000031202	118.018	0.658659	0.313763	2.09922	0.0357973	0.99942	Rab39b
ENSMUSG00000024570	423.661	-0.537691	0.256141	-2.0992	0.0357995	0.99942	Rbfa
ENSMUSG00000079020	854.636	-0.463991	0.221047	-2.09906	0.0358119	0.99942	Slc45a4
ENSMUSG00000103653	5.24236	-2.97011	1.41517	-2.09877	0.0358373	0.99942	NA
ENSMUSG00000062200	51.964	1.00388	0.478437	2.09824	0.0358839	0.99942	Vmn2r7
ENSMUSG00000104377	991.592	0.880357	0.419644	2.09786	0.0359171	0.99942	NA
ENSMUSG00000034456	7.3118	2.52607	1.20514	2.09608	0.0360751	0.99942	Uroc1
ENSMUSG00000063605	109.664	-0.661611	0.315662	-2.09595	0.0360867	0.99942	Ccdc102a
ENSMUSG00000116673	479.494	0.682074	0.32557	2.09502	0.0361694	0.99942	A630089N07Rik
ENSMUSG00000112667	338.928	1.06849	0.510851	2.09158	0.0364757	0.99942	NA
ENSMUSG00000036856	3656.21	-0.526933	0.252009	-2.09093	0.036534	0.99942	Wnt4
ENSMUSG00000091239	459.915	0.703678	0.336542	2.09091	0.0365363	0.99942	Vmn2r76
ENSMUSG00000004113	499.593	0.764341	0.3656	2.09065	0.0365597	0.99942	Cacna1b
ENSMUSG00000028347	39.8972	1.12261	0.537111	2.09008	0.0366105	0.99942	Tmeff1
ENSMUSG00000016253	442.006	-0.484908	0.232018	-2.08996	0.0366215	0.99942	Nelfcd
ENSMUSG00000079014	4.79152	-3.11347	1.49012	-2.0894	0.0366717	0.99942	Serpina3i
ENSMUSG00000078868	145.787	1.06887	0.511993	2.08767	0.0368279	0.99942	Gm14412
ENSMUSG00000115697	124.104	0.735124	0.352199	2.08724	0.0368666	0.99942	NA
ENSMUSG00000009216	181.745	0.857362	0.410933	2.08638	0.0369445	0.99942	Fam163b
ENSMUSG00000061603	572.34	0.650854	0.311968	2.08628	0.0369529	0.99942	Akap6
ENSMUSG00000096887	4336.04	2.48808	1.19264	2.08619	0.0369611	0.99942	Gm20594
ENSMUSG00000002808	449.031	-0.446402	0.214013	-2.08586	0.036991	0.99942	Epdr1
ENSMUSG00000073421	2499.07	-0.461663	0.22135	-2.08567	0.0370087	0.99942	H2-Ab1
ENSMUSG00000033857	133.825	-0.644704	0.309169	-2.08528	0.0370438	0.99942	Engase
ENSMUSG00000037762	160.777	-0.716576	0.343772	-2.08445	0.0371192	0.99942	Slc16a9
ENSMUSG00000067951	307.227	0.981467	0.471015	2.08373	0.0371848	0.99942	Vmn1r227
ENSMUSG00000049939	171.646	-0.548671	0.263399	-2.08304	0.0372479	0.99942	Lrrc4
ENSMUSG00000052133	915.825	0.597762	0.287242	2.08104	0.03743	0.99942	Sema5b
ENSMUSG00000093382	62.9652	0.949525	0.456388	2.08052	0.0374778	0.99942	Vmn1r-ps14
ENSMUSG00000081058	60.2404	-0.911562	0.438285	-2.07984	0.0375404	0.99942	H3c15
ENSMUSG00000023089	274.72	0.8179	0.393642	2.07777	0.0377301	0.99942	Ndufa5
ENSMUSG00000027257	357.497	-0.59243	0.285188	-2.07734	0.0377706	0.99942	Pacsin3
ENSMUSG00000049122	52.1696	0.879122	0.423212	2.07726	0.0377775	0.99942	Frmd3
ENSMUSG00000117284	380.619	0.565299	0.272181	2.07692	0.0378085	0.99942	Gm7072
ENSMUSG00000083443	3.23273	4.43422	2.13601	2.07594	0.0378998	0.99942	NA
ENSMUSG00000021700	4806.54	0.635634	0.306265	2.07544	0.0379458	0.99942	Rab3c
ENSMUSG00000025427	439.074	0.724979	0.349834	2.07235	0.0382324	0.99942	Rnf165
ENSMUSG00000111928	857.509	0.820648	0.396028	2.0722	0.038247	0.99942	NA
ENSMUSG00000055228	19.9199	8.09617	3.90958	2.07085	0.0383726	0.99942	NA
ENSMUSG00000032855	4054.51	-0.585984	0.282973	-2.07081	0.0383763	0.99942	Pkd1
ENSMUSG00000118215	662.853	0.866652	0.418705	2.06984	0.0384675	0.99942	Vmn1r55
ENSMUSG00000017210	685.158	-0.500605	0.241934	-2.06918	0.0385293	0.99942	Med24
ENSMUSG00000038224	3.07728	3.59871	1.73974	2.06854	0.0385895	0.99942	Serpinf2
ENSMUSG00000096630	65.029	0.955893	0.462138	2.06841	0.0386011	0.99942	Vmn2r26
ENSMUSG00000028033	61.9989	1.21777	0.588864	2.06799	0.0386406	0.99942	Kcnq5
ENSMUSG00000026023	18.614	1.46733	0.709749	2.0674	0.0386969	0.99942	Cdk15
ENSMUSG00000028599	730.815	-0.463607	0.224274	-2.06714	0.038721	0.99942	Tnfrsf1b
ENSMUSG00000108857	135.033	1.07476	0.520034	2.06672	0.038761	0.99942	NA
ENSMUSG00000117310	3165.48	0.431379	0.208745	2.06653	0.0387781	0.99942	Ptp4a1
ENSMUSG00000031274	298.762	-0.54002	0.261533	-2.06483	0.0389395	0.99942	Col4a5
ENSMUSG00000055820	8.78714	1.83391	0.888639	2.06373	0.0390435	0.99942	Olfr967
ENSMUSG00000056836	4.18918	-5.17488	2.51061	-2.0612	0.0392838	0.99942	Pin4-ps
ENSMUSG00000034648	776.656	-0.543905	0.26389	-2.0611	0.0392932	0.99942	Lrrn1
ENSMUSG00000027274	194.147	-0.730894	0.354675	-2.06074	0.0393275	0.99942	Mkks
ENSMUSG00000068457	1175.82	0.647439	0.314237	2.06035	0.039365	0.99942	Uty
ENSMUSG00000000409	47.0619	-0.935187	0.454205	-2.05895	0.0394986	0.99942	Lck
ENSMUSG00000025762	213.62	0.677503	0.329402	2.05677	0.0397088	0.99942	Larp1b
ENSMUSG00000042751	143.44	0.698238	0.339583	2.05616	0.0397667	0.99942	Nmnat2
ENSMUSG00000060548	1097.94	-0.704896	0.34285	-2.05599	0.0397837	0.99942	Tnfrsf19
ENSMUSG00000047824	531.743	-0.555785	0.270369	-2.05565	0.039816	0.99942	Pygo2
ENSMUSG00000024797	472.194	-0.499996	0.243256	-2.05543	0.0398377	0.99942	Vps51
ENSMUSG00000025766	417.576	0.490705	0.238887	2.05413	0.039963	0.99942	D3Ertd751e
ENSMUSG00000105835	4.27793	-5.18859	2.52653	-2.05365	0.04001	0.99942	NA
ENSMUSG00000029769	138.163	0.855258	0.416762	2.05215	0.0401554	0.99942	Ccdc136
ENSMUSG00000032940	100.227	0.746066	0.363633	2.0517	0.0401986	0.99942	Rbm11
ENSMUSG00000030752	82.9967	-0.8321	0.405803	-2.0505	0.0403155	0.99942	Kdm8
ENSMUSG00000038745	140.75	0.640366	0.312372	2.05001	0.0403632	0.99942	Nlrp6
ENSMUSG00000047216	240.903	0.66528	0.324849	2.04797	0.0405631	0.99942	Cdh19
ENSMUSG00000024480	460.564	0.639836	0.312434	2.04791	0.0405689	0.99942	Ap3s1
ENSMUSG00000053541	184.701	0.56975	0.278212	2.0479	0.04057	0.99942	NA
ENSMUSG00000078675	5.14959	3.06173	1.49556	2.04722	0.0406369	0.99942	Mup16
ENSMUSG00000090015	219.964	0.511368	0.249811	2.04702	0.0406558	0.99942	Gm15446
ENSMUSG00000057265	31.9646	1.21096	0.592353	2.04433	0.040921	0.99942	Bbof1
ENSMUSG00000100899	54.4109	0.990943	0.484747	2.04425	0.0409293	0.99942	Olfr1167
ENSMUSG00000004980	4597.39	0.508067	0.248734	2.04262	0.0410905	0.99942	Hnrnpa2b1
ENSMUSG00000031328	6900.42	-0.517955	0.25369	-2.04168	0.0411829	0.99942	Flna
ENSMUSG00000056131	594.699	0.426565	0.209118	2.03983	0.0413676	0.99942	Pgm3
ENSMUSG00000096422	2.24676	4.94953	2.42746	2.03897	0.041453	0.99942	Igkv12-44
ENSMUSG00000010066	305.919	0.530211	0.260048	2.0389	0.0414601	0.99942	Cacna2d2
ENSMUSG00000111696	294.516	0.897765	0.440457	2.03826	0.0415242	0.99942	NA
ENSMUSG00000043822	160.435	-0.966795	0.474509	-2.03746	0.0416037	0.99942	Adamtsl5
ENSMUSG00000026470	702.299	0.440835	0.216487	2.03632	0.0417185	0.99942	Stx6
ENSMUSG00000028145	118.744	0.578804	0.284303	2.03587	0.0417631	0.99942	Them4
ENSMUSG00000042436	121.235	-0.801632	0.393934	-2.03494	0.041857	0.99942	Mfap4
ENSMUSG00000078903	1876.56	0.521255	0.256191	2.03463	0.0418878	0.99942	Gm14391
ENSMUSG00000026620	295.839	-0.459247	0.225739	-2.03442	0.0419093	0.99942	Mark1
ENSMUSG00000010476	60.0322	1.65721	0.815042	2.03329	0.0420236	0.99942	Ebf3
ENSMUSG00000020866	28.9609	-1.53046	0.75334	-2.03156	0.0421979	0.99942	Cacna1g
ENSMUSG00000002617	281.73	0.544455	0.26811	2.03071	0.0422842	0.99942	Zfp40
ENSMUSG00000040564	53.512	1.54033	0.758687	2.03026	0.0423298	0.99942	Apoc1
ENSMUSG00000025232	1758.44	-0.404002	0.199009	-2.03007	0.0423498	0.99942	Hexa
ENSMUSG00000051951	155.283	0.562593	0.277165	2.02981	0.0423758	0.99942	Xkr4
ENSMUSG00000074607	250.437	0.848641	0.41821	2.02922	0.0424358	0.99942	Tox2
ENSMUSG00000036585	1148.19	-0.398807	0.196556	-2.02898	0.0424604	0.99942	Fgf1
ENSMUSG00000021470	971.118	0.386602	0.190568	2.02868	0.0424907	0.99942	Ercc6l2
ENSMUSG00000029193	75.3711	0.751577	0.370532	2.02837	0.0425221	0.99942	Cckar
ENSMUSG00000021303	482.664	0.758118	0.373996	2.02707	0.0426548	0.99942	Gng4
ENSMUSG00000030745	40.8321	-0.891293	0.440057	-2.0254	0.0428262	0.99942	Il21r
ENSMUSG00000035173	922.306	0.583726	0.288366	2.02425	0.0429441	0.99942	Ccdc186
ENSMUSG00000019852	1814.99	0.570455	0.281818	2.0242	0.0429498	0.99942	Arfgef3
ENSMUSG00000034708	2300.3	-0.428545	0.211727	-2.02404	0.0429657	0.99942	Grn
ENSMUSG00000071796	5968.53	0.492537	0.243388	2.02367	0.0430038	0.99942	6820431F20Rik
ENSMUSG00000045589	90.5967	0.681411	0.336803	2.02317	0.0430555	0.99942	Frrs1l
ENSMUSG00000021464	214.494	-0.538947	0.266561	-2.02185	0.0431916	0.99942	Ror2
ENSMUSG00000073805	306.721	0.600257	0.296976	2.02123	0.0432557	0.99942	Insyn2a
ENSMUSG00000112149	487.88	0.947339	0.468852	2.02055	0.0433262	0.99942	NA
ENSMUSG00000050666	560.002	-0.494382	0.244684	-2.0205	0.043332	0.99942	Vstm4
ENSMUSG00000038732	113.424	-0.582738	0.288465	-2.02013	0.0433698	0.99942	Mboat1
ENSMUSG00000046881	493.783	0.698938	0.346072	2.01963	0.0434216	0.99942	Olfr374
ENSMUSG00000031217	1326.78	-0.366293	0.181372	-2.01957	0.043428	0.99942	Efnb1
ENSMUSG00000047963	170.645	-0.638448	0.316135	-2.01954	0.0434311	0.99942	Stbd1
ENSMUSG00000002820	269.071	-0.61757	0.30597	-2.0184	0.0435493	0.99942	Atg4d
ENSMUSG00000062312	187.306	-0.598258	0.296465	-2.01797	0.043594	0.99942	Erbb2
ENSMUSG00000021676	7227.39	0.528945	0.262215	2.01722	0.043673	0.99942	Iqgap2
ENSMUSG00000026904	316.137	0.543464	0.269537	2.01629	0.0437699	0.99942	Slc4a10
ENSMUSG00000015396	119.55	-0.667746	0.331202	-2.01613	0.0437863	0.99942	Cd83
ENSMUSG00000074141	15.7025	-1.67532	0.831116	-2.01574	0.0438267	0.99942	Il4i1
ENSMUSG00000111917	299.908	0.956417	0.474511	2.01559	0.0438432	0.99942	NA
ENSMUSG00000007908	189.821	0.564349	0.280098	2.01483	0.0439225	0.99942	Hmgcll1
ENSMUSG00000000884	39.2765	-1.05497	0.523943	-2.01353	0.0440593	0.99942	Gnb1l
ENSMUSG00000090353	273.172	1.07115	0.532235	2.01255	0.0441618	0.99942	NA
ENSMUSG00000055430	851.832	0.533656	0.265223	2.01211	0.0442089	0.99942	Nap1l5
ENSMUSG00000000126	42.6788	-0.848011	0.421458	-2.01209	0.0442105	0.99942	Wnt9a
ENSMUSG00000037225	305.351	-0.486202	0.241807	-2.01071	0.0443565	0.99942	Fgf2
ENSMUSG00000031298	128.475	-0.726774	0.361747	-2.00907	0.04453	0.99942	Adgrg2
ENSMUSG00000021140	3913.46	0.625297	0.311246	2.00901	0.0445359	0.99942	Pcnx
ENSMUSG00000030364	6.5125	2.15226	1.07182	2.00803	0.0446398	0.99942	Clec2h
ENSMUSG00000000976	478.543	-0.44513	0.221717	-2.00765	0.0446805	0.99942	Heatr6
ENSMUSG00000094935	3.89032	-5.07722	2.52959	-2.00713	0.0447355	0.99942	NA
ENSMUSG00000037989	360.298	0.57285	0.285452	2.00682	0.0447687	0.99942	Wnk2
ENSMUSG00000096002	3353.04	0.614553	0.306258	2.00665	0.044787	0.99942	Vmn2r53
ENSMUSG00000032101	130.754	0.628547	0.313377	2.00572	0.0448861	0.99942	Ddx25
ENSMUSG00000035697	278.282	-0.497534	0.248199	-2.00458	0.0450078	0.99942	Arhgap45
ENSMUSG00000000708	1454.87	0.513518	0.256493	2.00207	0.0452772	0.99942	Kat2b
ENSMUSG00000115020	402.328	0.891627	0.445402	2.00185	0.0453012	0.99942	Vmn1r218
ENSMUSG00000027858	348.758	0.577709	0.288631	2.00155	0.0453333	0.99942	Tspan2
ENSMUSG00000063903	2.23683	-4.28449	2.14112	-2.00105	0.0453869	0.99942	Klk1
ENSMUSG00000044712	4415.46	0.701409	0.350692	2.00007	0.0454926	0.99942	Slc38a6
ENSMUSG00000082381	3.93529	-5.08476	2.5426	-1.99982	0.0455192	0.99942	NA
ENSMUSG00000025185	59.4309	-0.957239	0.478672	-1.99978	0.045524	0.99942	Loxl4
ENSMUSG00000027829	960.819	0.370052	0.185234	1.99775	0.0457435	0.99942	Ccnl1
ENSMUSG00000091945	908.707	0.654933	0.327846	1.99768	0.0457511	0.99942	Vmn2r114
ENSMUSG00000037820	2131.02	-0.443294	0.221914	-1.99759	0.0457613	0.99942	Tgm2
ENSMUSG00000027508	511.364	-0.556367	0.278548	-1.99738	0.0457836	0.99942	Pag1
ENSMUSG00000045417	12.3151	1.71362	0.857941	1.99737	0.0457851	0.99942	Vmn1r230
ENSMUSG00000096146	38.2485	-0.889239	0.445339	-1.99677	0.0458506	0.99942	Kcnj11
ENSMUSG00000025876	731.624	0.8196	0.410553	1.99633	0.0458979	0.99942	Unc5a
ENSMUSG00000027500	376.42	0.616988	0.309384	1.99425	0.046125	0.99942	Stmn2
ENSMUSG00000050010	49.9985	-0.86336	0.432952	-1.99413	0.0461384	0.99942	Shisa3
ENSMUSG00000096696	435.383	0.492681	0.247143	1.99351	0.0462056	0.99942	Zfp960
ENSMUSG00000033510	28.1528	1.37136	0.687929	1.99347	0.0462105	0.99942	Otud7a
ENSMUSG00000020911	7.40004	-2.51086	1.26028	-1.99231	0.0463368	0.99942	Krt19
ENSMUSG00000055567	2387.8	0.600561	0.301472	1.9921	0.0463603	0.99942	Unc80
ENSMUSG00000036792	1393.72	0.532587	0.267703	1.98947	0.046649	0.99942	Mbd5
ENSMUSG00000040118	8360.15	0.342371	0.172116	1.98919	0.0466807	0.99942	Cacna2d1
ENSMUSG00000069170	197.361	0.516457	0.259661	1.98897	0.0467049	0.99942	Adgrv1
ENSMUSG00000092120	158.035	1.00825	0.507029	1.98855	0.0467514	0.99942	Vmn2r90
ENSMUSG00000014030	18.2754	-1.46001	0.73434	-1.9882	0.0467895	0.99942	Pax5
ENSMUSG00000110519	1115.24	0.631963	0.31799	1.98736	0.046882	0.99942	NA
ENSMUSG00000031837	212.425	0.491325	0.24724	1.98724	0.0468961	0.99942	Necab2
ENSMUSG00000031497	83.3515	-0.744114	0.374514	-1.98688	0.0469359	0.99942	Tnfsf13b
ENSMUSG00000061601	4809.96	0.741988	0.37361	1.986	0.0470334	0.99942	Pclo
ENSMUSG00000068323	10.5999	1.92909	0.971991	1.98468	0.0471798	0.99942	Slc4a5
ENSMUSG00000113684	339.944	0.932852	0.470051	1.98458	0.0471915	0.99942	NA
ENSMUSG00000071252	290.756	0.463137	0.23349	1.98354	0.0473074	0.99942	2210408I21Rik
ENSMUSG00000027806	1283.41	0.41265	0.208102	1.98292	0.0473766	0.99942	Tsc22d2
ENSMUSG00000040260	1696.89	-0.433159	0.218508	-1.98235	0.0474399	0.99942	Daam2
ENSMUSG00000074677	23.4243	-1.59062	0.802875	-1.98116	0.0475737	0.99942	Sirpb1c
ENSMUSG00000030605	3052.81	-0.460334	0.232377	-1.98098	0.0475935	0.99942	Mfge8
ENSMUSG00000022754	100.397	-0.653609	0.330178	-1.97957	0.0477523	0.99942	Tmem45a
ENSMUSG00000069049	844.431	0.698895	0.353228	1.9786	0.0478613	0.99942	Eif2s3y
ENSMUSG00000052131	13482.2	-0.524883	0.265293	-1.9785	0.0478723	0.99942	Akr1b7
ENSMUSG00000078674	2.77799	-4.58703	2.31951	-1.97759	0.0479754	0.99942	Mup18
ENSMUSG00000032534	325.912	0.436098	0.220643	1.97649	0.0480996	0.99942	Cep63
ENSMUSG00000022321	14.6078	1.33924	0.677659	1.97627	0.048124	0.99942	Cdh10
ENSMUSG00000026177	512.095	-0.524672	0.265572	-1.97563	0.0481969	0.99942	Slc11a1
ENSMUSG00000044951	48.3399	1.01379	0.513314	1.97499	0.0482696	0.99942	Mylk4
ENSMUSG00000027331	24.733	-1.45207	0.735388	-1.97456	0.048318	0.99942	Knstrn
ENSMUSG00000028980	3480.37	-0.420802	0.213116	-1.97453	0.0483219	0.99942	H6pd
ENSMUSG00000024309	229.175	0.617612	0.31306	1.97283	0.0485154	0.99942	Pfdn6
ENSMUSG00000037656	614.28	-0.432143	0.219148	-1.97192	0.0486184	0.99942	Slc20a2
ENSMUSG00000043004	1043.62	0.410578	0.208224	1.97181	0.0486316	0.99942	Gng2
ENSMUSG00000039153	521.842	0.550127	0.279012	1.9717	0.0486442	0.99942	Runx2
ENSMUSG00000109196	340.771	0.896595	0.45481	1.97136	0.0486827	0.99942	NA
ENSMUSG00000022221	29.6915	-1.18653	0.602038	-1.97086	0.0487398	0.99942	Ripk3
ENSMUSG00000043183	626.486	0.501132	0.254395	1.9699	0.0488497	0.99942	Simc1
ENSMUSG00000019899	2399.79	-0.46169	0.234517	-1.96868	0.0489896	0.99942	Lama2
ENSMUSG00000028107	546.327	-0.442413	0.224793	-1.96809	0.0490575	0.99942	Tars2
ENSMUSG00000117234	44.3052	0.824001	0.419269	1.96533	0.0493763	0.99942	NA
ENSMUSG00000112522	214.882	0.949012	0.483084	1.96449	0.0494738	0.99942	NA
ENSMUSG00000052336	488.271	-0.515666	0.26264	-1.96339	0.0496007	0.99942	Cx3cr1
ENSMUSG00000058589	38.203	0.967918	0.493027	1.96321	0.0496215	0.99942	Anks1b
ENSMUSG00000026407	7.20806	-2.69299	1.37206	-1.96274	0.0496769	0.99942	Cacna1s
ENSMUSG00000030638	114.824	0.628852	0.320479	1.96222	0.0497363	0.99942	Sh3gl3
ENSMUSG00000021876	703.125	-0.473825	0.24149	-1.96209	0.0497523	0.99942	Rnase4
ENSMUSG00000006599	538.048	0.418695	0.21347	1.96138	0.049835	0.99942	Gtf2h1
ENSMUSG00000032691	33.0935	-1.06035	0.540798	-1.96071	0.0499126	0.99942	Nlrp3

## Sheet: Adrenal Female (p<0.05)
	baseMean	log2FoldChange	lfcSE	stat	pvalue	padj	symbol
ENSMUSG00000030653	1398.79	0.638846	0.111988	5.70459	1.1662e-08	0.000189632	Pde2a
ENSMUSG00000109222	19.5321	7.33587	1.3193	5.56045	2.69083e-08	0.000189632	NA
ENSMUSG00000081485	20.4756	7.4112	1.33586	5.54787	2.89176e-08	0.000189632	NA
ENSMUSG00000046876	3357.55	-0.614381	0.114376	-5.37157	7.80546e-08	0.000383892	Atxn1
ENSMUSG00000092232	18.5722	7.2737	1.37908	5.2743	1.33264e-07	0.00052434	NA
ENSMUSG00000024164	38224.5	-1.04002	0.199542	-5.21202	1.86796e-07	0.000612472	C3
ENSMUSG00000026950	366.514	-1.00438	0.207082	-4.85013	1.23382e-06	0.00346755	Neb
ENSMUSG00000021010	118.537	-2.17138	0.47932	-4.53013	5.89481e-06	0.0133732	Npas3
ENSMUSG00000114432	8.39408	-6.86359	1.51773	-4.52227	6.11796e-06	0.0133732	NA
ENSMUSG00000026941	42.9635	-1.81098	0.403481	-4.48839	7.17619e-06	0.0141177	Mamdc4
ENSMUSG00000046794	259.728	0.905079	0.203718	4.44279	8.87985e-06	0.0155108	Ppp1r3b
ENSMUSG00000038668	478.254	0.822315	0.18566	4.42914	9.46118e-06	0.0155108	Lpar1
ENSMUSG00000018566	305.682	1.02663	0.233502	4.39664	1.09938e-05	0.0166309	Slc2a4
ENSMUSG00000054414	1623.24	0.443709	0.101289	4.3806	1.18351e-05	0.0166309	Slc30a7
ENSMUSG00000034156	272.209	0.844338	0.193755	4.35777	1.31396e-05	0.017233	Tspoap1
ENSMUSG00000020926	234.78	0.935615	0.217756	4.29661	1.7343e-05	0.0213243	Adam11
ENSMUSG00000047880	16.1177	-3.03139	0.712096	-4.25699	2.07198e-05	0.0239777	Cxcr5
ENSMUSG00000092534	17.0402	4.18608	0.996203	4.20203	2.64531e-05	0.0280597	NA
ENSMUSG00000021303	367.679	0.900212	0.214512	4.19656	2.70998e-05	0.0280597	Gng4
ENSMUSG00000015053	1357.6	0.574785	0.142784	4.02555	5.68429e-05	0.0529451	Gata2
ENSMUSG00000029802	748.92	0.521733	0.129899	4.01645	5.90819e-05	0.0529451	Abcg2
ENSMUSG00000024712	5117.38	-0.695679	0.173229	-4.01595	5.92076e-05	0.0529451	Rfk
ENSMUSG00000066113	747.904	1.00952	0.255788	3.94669	7.9239e-05	0.0677769	Adamtsl1
ENSMUSG00000034656	257.28	0.769715	0.196154	3.92404	8.70779e-05	0.0713785	Cacna1a
ENSMUSG00000033576	81.9432	1.19621	0.30659	3.90167	9.55309e-05	0.0751752	Apol6
ENSMUSG00000039278	1337.34	0.619053	0.160275	3.86244	0.00011226	0.0838063	Pcsk1n
ENSMUSG00000022558	1309.66	0.514847	0.133501	3.85651	0.000115019	0.0838063	Mroh1
ENSMUSG00000030509	729.906	0.542153	0.141163	3.84062	0.000122723	0.0862261	Asb7
ENSMUSG00000025980	17901.6	-0.519976	0.136868	-3.79911	0.000145214	0.0985104	Hspd1
ENSMUSG00000048988	710.444	-0.895885	0.236424	-3.78932	0.000151062	0.0990612	Elfn1
ENSMUSG00000024451	1137.42	-0.466578	0.124451	-3.74907	0.000177488	0.112636	Arap3
ENSMUSG00000035202	6124.47	-2.72665	0.738262	-3.69334	0.000221332	0.134478	Lars2
ENSMUSG00000030228	84.5089	-2.02933	0.550177	-3.6885	0.000225577	0.134478	Pik3c2g
ENSMUSG00000116461	9.6088	5.292	1.44225	3.66926	0.00024325	0.137821	Gm44502
ENSMUSG00000029306	125.203	-1.42135	0.387581	-3.66723	0.000245196	0.137821	Ibsp
ENSMUSG00000073434	356.907	0.610718	0.168728	3.61954	0.000295124	0.161277	Wdr90
ENSMUSG00000040606	1628.19	-0.436897	0.121371	-3.59969	0.000318593	0.166193	Kazn
ENSMUSG00000002020	316.167	-1.13706	0.316049	-3.59772	0.000321015	0.166193	Ltbp2
ENSMUSG00000091071	71.5162	-2.31695	0.650677	-3.56083	0.000369683	0.18155	NA
ENSMUSG00000044365	376.341	0.636629	0.179257	3.55148	0.00038307	0.18155	Cxxc4
ENSMUSG00000026526	1536.93	-0.426538	0.12011	-3.55122	0.000383454	0.18155	Fh1
ENSMUSG00000096459	13.0462	-5.24369	1.47777	-3.54839	0.000387592	0.18155	Ighv9-3
ENSMUSG00000010505	166.98	1.45018	0.412844	3.51267	0.000443632	0.197354	Myt1
ENSMUSG00000034848	548.195	-0.541888	0.15433	-3.51122	0.000446049	0.197354	Ttc21b
ENSMUSG00000006050	1005.83	-0.398551	0.113611	-3.50804	0.000451427	0.197354	Sra1
ENSMUSG00000069378	29.7437	-2.00598	0.573124	-3.50009	0.000465107	0.198914	Prdm6
ENSMUSG00000036885	162.191	0.874176	0.25057	3.48875	0.000485284	0.201612	Arhgef26
ENSMUSG00000024331	319.924	-0.61739	0.17715	-3.48512	0.00049191	0.201612	Dsc2
ENSMUSG00000029772	5657.55	-0.452107	0.130095	-3.47522	0.000510439	0.204936	Ahcyl2
ENSMUSG00000040112	633.813	-0.583035	0.168107	-3.46824	0.000523879	0.206125	Mrps35
ENSMUSG00000020262	1312.21	0.680758	0.198097	3.43648	0.000589319	0.227327	Adarb1
ENSMUSG00000025648	215.618	0.685731	0.200277	3.42391	0.000617272	0.23353	Pfkfb4
ENSMUSG00000026600	32863.2	-0.366733	0.107327	-3.41697	0.000633222	0.235045	Soat1
ENSMUSG00000027206	3303.95	-0.312037	0.0916187	-3.40582	0.000659656	0.240322	Cops2
ENSMUSG00000016346	515.139	0.685632	0.202535	3.38526	0.000711115	0.25239	Kcnq2
ENSMUSG00000041592	231.073	-1.02945	0.304352	-3.38244	0.000718438	0.25239	Sdk2
ENSMUSG00000000308	106.112	0.927241	0.276678	3.35133	0.000804237	0.271643	Ckmt1
ENSMUSG00000031906	516.27	0.487274	0.145798	3.34212	0.000831402	0.271643	Smpd3
ENSMUSG00000029762	1656.85	-0.369799	0.110677	-3.34124	0.000834055	0.271643	Akr1b8
ENSMUSG00000017412	43.5771	2.25796	0.675907	3.34064	0.000835858	0.271643	Cacnb4
ENSMUSG00000022696	532.056	0.554308	0.166034	3.33851	0.000842283	0.271643	Sidt1
ENSMUSG00000050668	264.575	-0.882742	0.266049	-3.31797	0.000906743	0.287715	Gpatch11
ENSMUSG00000027854	1264.94	-0.622229	0.188123	-3.30757	0.000941104	0.293878	Sike1
ENSMUSG00000022619	628.107	0.452518	0.137284	3.29621	0.000980001	0.301243	Mapk8ip2
ENSMUSG00000031700	1772.23	-0.405106	0.123368	-3.28372	0.00102445	0.310063	Gpt2
ENSMUSG00000028876	60.5966	1.27835	0.390039	3.27749	0.00104735	0.312189	Epha10
ENSMUSG00000059743	1082.33	-0.522795	0.159757	-3.27243	0.00106626	0.313081	Fdps
ENSMUSG00000059708	583.208	-0.522033	0.16029	-3.25681	0.00112672	0.325968	Akap17b
ENSMUSG00000066800	592.039	-0.542569	0.166807	-3.25266	0.00114328	0.325968	Rnasel
ENSMUSG00000029797	104.104	1.01421	0.313816	3.23185	0.00122992	0.34566	Sspo
ENSMUSG00000021214	1380.89	-2.36443	0.733792	-3.22221	0.00127206	0.352468	Akr1c18
ENSMUSG00000049493	10.9016	-2.87495	0.895852	-3.20918	0.00133112	0.363711	Pls1
ENSMUSG00000039062	716.512	0.891264	0.278967	3.19487	0.00139893	0.377002	Anpep
ENSMUSG00000016386	794.772	-0.38041	0.120195	-3.16494	0.00155116	0.412379	Mpped2
ENSMUSG00000025813	139.373	0.903461	0.287804	3.13916	0.00169435	0.444438	Homer2
ENSMUSG00000049313	1803.98	0.479008	0.15381	3.11429	0.00184385	0.474901	Sorl1
ENSMUSG00000038555	346.947	0.638975	0.205331	3.11192	0.00185876	0.474901	Reep2
ENSMUSG00000026586	638.448	0.46923	0.151654	3.09408	0.00197423	0.49299	Prrx1
ENSMUSG00000061080	629.018	0.691841	0.223661	3.09326	0.00197968	0.49299	Lsamp
ENSMUSG00000024378	674.047	-0.42795	0.138534	-3.08913	0.00200743	0.493653	Stard4
ENSMUSG00000047117	33.158	-1.3408	0.435853	-3.07628	0.00209603	0.502464	Ankdd1b
ENSMUSG00000055884	565.037	-0.686058	0.223207	-3.07363	0.00211469	0.502464	Fancm
ENSMUSG00000031629	20.8436	-2.06857	0.673711	-3.07041	0.00213767	0.502464	Cenpu
ENSMUSG00000028347	51.5936	-1.17289	0.382154	-3.06915	0.00214672	0.502464	Tmeff1
ENSMUSG00000026708	81.0949	-0.905019	0.295475	-3.06293	0.0021918	0.502464	Cenpl
ENSMUSG00000005320	660.76	-0.452598	0.147797	-3.06229	0.00219651	0.502464	Fgfr4
ENSMUSG00000003037	1176.99	-0.423672	0.13901	-3.04779	0.00230532	0.517061	Rab8a
ENSMUSG00000118504	182.517	0.628567	0.206304	3.0468	0.00231289	0.517061	NA
ENSMUSG00000020728	184.113	-0.714864	0.235118	-3.04045	0.00236229	0.522171	Cep112
ENSMUSG00000033579	89.933	-1.38451	0.455962	-3.03646	0.00239373	0.523244	Fa2h
ENSMUSG00000028581	1726.66	0.476653	0.157785	3.0209	0.00252026	0.544847	Laptm5
ENSMUSG00000022186	2395.36	-0.347578	0.11564	-3.00567	0.00264993	0.548947	Oxct1
ENSMUSG00000044349	896.205	0.449915	0.149843	3.00259	0.00267697	0.548947	Snhg11
ENSMUSG00000027613	1152.17	0.396153	0.132041	3.00024	0.00269771	0.548947	Eif6
ENSMUSG00000071714	114.139	0.997176	0.332821	2.99613	0.00273426	0.548947	Csf2rb2
ENSMUSG00000036944	563.938	-0.49559	0.165453	-2.99536	0.00274124	0.548947	Tmem71
ENSMUSG00000038524	195.21	-0.616263	0.205763	-2.99501	0.00274438	0.548947	Fchsd1
ENSMUSG00000024731	76.084	-1.12787	0.376637	-2.9946	0.00274808	0.548947	Ms4a10
ENSMUSG00000028639	3733.72	-0.361009	0.12062	-2.99294	0.00276305	0.548947	Ybx1
ENSMUSG00000021175	54.7915	-1.05014	0.351844	-2.98467	0.00283886	0.548947	Cdca7l
ENSMUSG00000026204	1921.97	0.328684	0.110178	2.9832	0.00285252	0.548947	Ptprn
ENSMUSG00000026558	1577.93	-0.448991	0.150689	-2.9796	0.00288627	0.548947	Uck2
ENSMUSG00000005873	10208.5	-0.310144	0.104131	-2.97841	0.00289753	0.548947	Reep5
ENSMUSG00000020707	253.043	-0.556313	0.186812	-2.97794	0.00290197	0.548947	Rnf135
ENSMUSG00000032878	191.969	0.722907	0.244352	2.95847	0.00309171	0.579268	Ccdc85a
ENSMUSG00000041261	264.727	-0.619157	0.209741	-2.95201	0.00315714	0.585947	Car8
ENSMUSG00000036826	4.55923	-5.98298	2.0301	-2.94713	0.00320734	0.5897	Igflr1
ENSMUSG00000027994	152.354	0.715794	0.243408	2.94072	0.00327451	0.593017	Mcub
ENSMUSG00000026347	9.96047	4.09076	1.39157	2.93967	0.00328566	0.593017	Tmem163
ENSMUSG00000050954	325.295	-0.539195	0.183684	-2.93546	0.00333059	0.59566	Zfp169
ENSMUSG00000006378	310.902	0.477464	0.163119	2.92709	0.00342149	0.604402	Gcat
ENSMUSG00000029838	1609.66	-0.480508	0.164341	-2.92385	0.00345735	0.604402	Ptn
ENSMUSG00000098789	86.4478	0.868748	0.297729	2.91792	0.0035238	0.604402	Jmjd7
ENSMUSG00000029223	906.682	0.517087	0.177273	2.9169	0.00353531	0.604402	Uchl1
ENSMUSG00000000416	2850.95	0.347982	0.11933	2.91614	0.00354396	0.604402	Cttnbp2
ENSMUSG00000041258	1215.74	-0.723932	0.248399	-2.91439	0.0035638	0.604402	Zfp236
ENSMUSG00000012017	612.803	0.39065	0.134265	2.90954	0.00361959	0.608617	Scarf2
ENSMUSG00000008193	31.9729	-1.44585	0.498342	-2.90133	0.00371588	0.619513	Spib
ENSMUSG00000093930	3782.07	-0.413595	0.143452	-2.88317	0.00393694	0.650852	Hmgcs1
ENSMUSG00000064090	137.552	-0.712831	0.247526	-2.87983	0.0039789	0.652307	Vrk2
ENSMUSG00000032500	12.3556	2.27839	0.795835	2.8629	0.00419784	0.678042	Dclk3
ENSMUSG00000051790	1442.3	0.338041	0.118098	2.86237	0.00420481	0.678042	Nlgn2
ENSMUSG00000020014	68.4813	1.1614	0.40627	2.8587	0.00425385	0.680373	Cfap54
ENSMUSG00000027520	886.543	0.401076	0.140453	2.8556	0.0042956	0.681494	Zdbf2
ENSMUSG00000078773	21.6112	-1.88645	0.661215	-2.853	0.00433086	0.681494	Rad54b
ENSMUSG00000004113	363.803	0.60477	0.212674	2.84365	0.00446003	0.681494	Cacna1b
ENSMUSG00000069601	1018.94	0.354374	0.124752	2.84061	0.00450267	0.681494	Ank3
ENSMUSG00000017002	27.8249	1.83279	0.646159	2.83644	0.00456194	0.681494	Slpi
ENSMUSG00000023328	315.52	0.466247	0.164457	2.83508	0.00458142	0.681494	Ache
ENSMUSG00000022890	1308.48	-0.446092	0.157393	-2.83424	0.00459342	0.681494	Atp5j
ENSMUSG00000034731	836.959	0.418124	0.147537	2.83403	0.0045965	0.681494	Dgkh
ENSMUSG00000056069	205.555	0.673147	0.237563	2.83355	0.00460346	0.681494	Otulinl
ENSMUSG00000024270	778.755	0.415528	0.14666	2.83328	0.00460726	0.681494	Slc39a6
ENSMUSG00000025427	275.407	0.628975	0.222223	2.83037	0.00464938	0.681516	Rnf165
ENSMUSG00000064128	408.576	-0.448649	0.158686	-2.82728	0.00469457	0.681516	Cenpj
ENSMUSG00000026740	1418.25	-0.307988	0.109227	-2.8197	0.0048069	0.681516	Dnajc1
ENSMUSG00000052373	402.081	0.639109	0.226734	2.81876	0.00482099	0.681516	Mpp3
ENSMUSG00000036594	3399.31	0.46201	0.16397	2.81766	0.00483755	0.681516	H2-Aa
ENSMUSG00000011589	20.2858	1.58276	0.561872	2.81694	0.00484838	0.681516	Fsd1
ENSMUSG00000047789	1241.52	-0.399321	0.141776	-2.81656	0.00485411	0.681516	Slc38a9
ENSMUSG00000083738	52.939	-1.14432	0.406572	-2.81455	0.00488455	0.681516	Gm14592
ENSMUSG00000112844	42.3676	1.8446	0.659436	2.79723	0.00515421	0.714076	NA
ENSMUSG00000034709	1088.81	0.374369	0.134377	2.78596	0.00533698	0.724327	Ppp1r21
ENSMUSG00000021196	974.593	-0.347227	0.124658	-2.78543	0.0053456	0.724327	Pfkp
ENSMUSG00000031934	158.746	-0.598014	0.215025	-2.78114	0.00541684	0.724327	Panx1
ENSMUSG00000024222	2524.59	0.572588	0.205998	2.77958	0.00544293	0.724327	Fkbp5
ENSMUSG00000022510	19.5039	-1.62133	0.583799	-2.7772	0.00548294	0.724327	Trp63
ENSMUSG00000050440	37.8031	-1.3543	0.488338	-2.77329	0.0055493	0.724327	Hamp
ENSMUSG00000066442	237.43	-0.694202	0.250385	-2.77254	0.00556215	0.724327	Mthfs
ENSMUSG00000012519	284.063	-0.474433	0.171124	-2.77245	0.00556365	0.724327	Mlkl
ENSMUSG00000032254	58.1649	-1.50139	0.541778	-2.77123	0.00558447	0.724327	Kif23
ENSMUSG00000048126	1890.45	-0.392086	0.141595	-2.76906	0.00562174	0.724327	Col6a3
ENSMUSG00000005237	35.2854	-1.64327	0.59358	-2.7684	0.0056332	0.724327	Dnah2
ENSMUSG00000031502	13946.5	-0.338477	0.122592	-2.76101	0.00576232	0.729391	Col4a1
ENSMUSG00000047515	13.0678	-2.21499	0.802315	-2.76075	0.00576691	0.729391	BC049715
ENSMUSG00000022208	201.123	0.620138	0.224739	2.75937	0.00579135	0.729391	Jph4
ENSMUSG00000030244	29.6686	2.34515	0.85368	2.7471	0.00601248	0.729391	Gys2
ENSMUSG00000076613	10.5118	3.90352	1.42096	2.7471	0.0060125	0.729391	Ighg2b
ENSMUSG00000042514	2425.97	-0.371074	0.135191	-2.74482	0.00605445	0.729391	Klhl14
ENSMUSG00000057604	169.047	-0.710863	0.259029	-2.74433	0.00606339	0.729391	Lmcd1
ENSMUSG00000031749	1237.65	0.293616	0.107015	2.74369	0.00607535	0.729391	St3gal2
ENSMUSG00000026959	461.51	0.463921	0.16923	2.74136	0.00611862	0.729391	Grin1
ENSMUSG00000024588	4053.92	-0.258269	0.0942393	-2.74056	0.00613343	0.729391	Fech
ENSMUSG00000020388	317.56	-0.569705	0.207889	-2.74043	0.00613597	0.729391	Pdlim4
ENSMUSG00000028282	533.634	-0.589636	0.215197	-2.73998	0.00614431	0.729391	Casp8ap2
ENSMUSG00000064294	269.085	0.532761	0.19451	2.73899	0.0061628	0.729391	Aox3
ENSMUSG00000048583	675.029	0.535975	0.195793	2.73746	0.00619165	0.729391	Igf2
ENSMUSG00000017485	3869.36	-0.285557	0.104458	-2.73372	0.0062624	0.733334	Top2b
ENSMUSG00000066129	118.699	0.692113	0.253466	2.73059	0.0063221	0.733836	Kndc1
ENSMUSG00000042801	301.717	0.4887	0.179081	2.72893	0.00635402	0.733836	Olfr769
ENSMUSG00000074272	319.425	-0.675709	0.247909	-2.72563	0.0064178	0.733836	Ceacam1
ENSMUSG00000042379	470.953	-0.470834	0.172748	-2.72555	0.00641935	0.733836	Esm1
ENSMUSG00000030789	524.628	0.747708	0.275	2.71894	0.00654912	0.733836	Itgax
ENSMUSG00000041112	1425.97	-0.356912	0.131294	-2.71841	0.00655961	0.733836	Elmo1
ENSMUSG00000031574	234503	-0.327661	0.12061	-2.7167	0.00659369	0.733836	Star
ENSMUSG00000015968	1049.55	0.387475	0.142632	2.71661	0.00659544	0.733836	Cacna1d
ENSMUSG00000108929	7.11278	-3.09492	1.1394	-2.71626	0.0066024	0.733836	Cc2d2b
ENSMUSG00000025375	762.219	0.521105	0.192095	2.71276	0.00667264	0.737477	Aatk
ENSMUSG00000021136	5388.66	-0.251569	0.092997	-2.70513	0.00682777	0.741727	Smoc1
ENSMUSG00000029420	338.111	0.511089	0.188951	2.70488	0.00683285	0.741727	Rimbp2
ENSMUSG00000036330	1526.84	0.304694	0.112702	2.70353	0.00686067	0.741727	Slc18a1
ENSMUSG00000030861	8129.14	-0.476453	0.176318	-2.70223	0.00688763	0.741727	Acadsb
ENSMUSG00000024261	712.115	0.417761	0.154842	2.69798	0.0069762	0.741727	Syt4
ENSMUSG00000003778	1114.17	-0.32955	0.122223	-2.6963	0.00701144	0.741727	Brd8
ENSMUSG00000020431	518.28	0.51222	0.190015	2.69569	0.00702435	0.741727	Adcy1
ENSMUSG00000007656	1604.78	-0.596234	0.221264	-2.69468	0.00704572	0.741727	Arpp19
ENSMUSG00000069303	18.1531	7.23138	2.68472	2.69353	0.00706993	0.741727	H2bc24
ENSMUSG00000033061	1170.13	0.366894	0.136256	2.69268	0.00708813	0.741727	Resp18
ENSMUSG00000037643	1637.28	-0.375529	0.139808	-2.68603	0.00723064	0.743432	Prkci
ENSMUSG00000022946	818.042	0.372029	0.13853	2.68555	0.00724098	0.743432	Dop1b
ENSMUSG00000058192	363.058	-0.447455	0.166654	-2.68494	0.0072543	0.743432	Zfp846
ENSMUSG00000038807	493.382	0.469717	0.174949	2.68488	0.00725558	0.743432	Rap1gap2
ENSMUSG00000056665	239.287	0.789276	0.294167	2.68309	0.00729456	0.743553	Them6
ENSMUSG00000047030	854.169	0.421491	0.157209	2.68108	0.0073385	0.744176	Spata2
ENSMUSG00000011832	1004.92	0.376988	0.140712	2.67915	0.00738091	0.74464	Evi5l
ENSMUSG00000095869	4.01854	-4.75095	1.77473	-2.677	0.00742839	0.745606	NA
ENSMUSG00000050345	206.264	-0.789821	0.295718	-2.67086	0.00756574	0.755537	4930486L24Rik
ENSMUSG00000030087	523.712	0.539071	0.202394	2.66347	0.00773399	0.764748	Klf15
ENSMUSG00000041741	1424.58	0.336974	0.126521	2.66339	0.00773573	0.764748	Pde3a
ENSMUSG00000001247	111.582	1.19635	0.449489	2.66157	0.00777767	0.765051	Lsr
ENSMUSG00000036062	151.293	0.694164	0.261274	2.65685	0.0078875	0.766807	Phf24
ENSMUSG00000005268	15826.7	-0.5832	0.21954	-2.65646	0.00789652	0.766807	Prlr
ENSMUSG00000107928	60.983	-1.39377	0.524806	-2.65578	0.00791246	0.766807	NA
ENSMUSG00000017446	773.103	-0.349733	0.132105	-2.6474	0.00811144	0.769354	C1qtnf1
ENSMUSG00000001248	795.294	0.354861	0.134069	2.64686	0.00812434	0.769354	Gramd1a
ENSMUSG00000045917	276.809	0.501214	0.189367	2.64679	0.00812599	0.769354	Tmem268
ENSMUSG00000092356	3.25248	-5.57071	2.10475	-2.64673	0.00812734	0.769354	NA
ENSMUSG00000050122	18.9777	2.55117	0.963999	2.64644	0.00813428	0.769354	Vwa3b
ENSMUSG00000020101	718.292	0.518462	0.196272	2.64155	0.0082527	0.774486	Vsir
ENSMUSG00000037638	335.348	0.519023	0.196646	2.63938	0.00830586	0.774486	Zbtb42
ENSMUSG00000032349	10653.4	-0.360616	0.136631	-2.63935	0.00830664	0.774486	Elovl5
ENSMUSG00000043929	696.453	0.474521	0.180144	2.63413	0.00843539	0.780639	Klhl15
ENSMUSG00000024654	614.262	-0.436154	0.165691	-2.63234	0.00848001	0.780639	Asrgl1
ENSMUSG00000021702	60.0543	1.08303	0.411505	2.63187	0.00849168	0.780639	Thbs4
ENSMUSG00000000056	479.055	-0.567872	0.216007	-2.62895	0.00856485	0.783704	Narf
ENSMUSG00000028469	1194.14	0.41031	0.156293	2.62526	0.00865827	0.785549	Npr2
ENSMUSG00000068122	794.466	0.562711	0.214366	2.625	0.00866488	0.785549	Agtr2
ENSMUSG00000022265	1083.95	0.298744	0.113928	2.62221	0.00873611	0.788374	Ank
ENSMUSG00000022199	1187.94	0.32051	0.122448	2.61751	0.00885742	0.793201	Slc22a17
ENSMUSG00000040152	1599.78	-0.599145	0.228952	-2.6169	0.00887314	0.793201	Thbs1
ENSMUSG00000079419	365.808	0.50907	0.194928	2.61158	0.00901245	0.793201	Ms4a6c
ENSMUSG00000021750	233.225	0.845024	0.323744	2.61016	0.00904991	0.793201	Fam107a
ENSMUSG00000025007	815.334	-0.321011	0.123001	-2.60983	0.00905867	0.793201	Aldh18a1
ENSMUSG00000093384	3.54974	-5.63085	2.15825	-2.60899	0.00908093	0.793201	NA
ENSMUSG00000070371	107.566	-0.667727	0.256057	-2.60773	0.00911441	0.793201	Prss36
ENSMUSG00000032968	262.379	0.544317	0.208784	2.60708	0.00913184	0.793201	Inha
ENSMUSG00000045333	612.058	0.489609	0.188038	2.60378	0.00922018	0.793201	Zfp423
ENSMUSG00000069793	1510.26	-0.451714	0.173505	-2.60346	0.00922885	0.793201	Slfn9
ENSMUSG00000029775	3219.76	-0.290753	0.111924	-2.59778	0.0093829	0.793201	Klhdc10
ENSMUSG00000028782	825.398	0.535056	0.205974	2.59769	0.00938526	0.793201	Adgrb2
ENSMUSG00000049892	530.356	-0.429696	0.165519	-2.59605	0.00943028	0.793201	Rasd1
ENSMUSG00000042388	277.673	0.582213	0.224384	2.59472	0.00946685	0.793201	Dlgap3
ENSMUSG00000029629	907.313	0.382276	0.147375	2.59391	0.00948923	0.793201	Phf14
ENSMUSG00000060807	14.1811	2.61607	1.00915	2.59236	0.00953203	0.793201	Serpina6
ENSMUSG00000040010	2683.47	0.369123	0.142468	2.59092	0.00957206	0.793201	Slc7a5
ENSMUSG00000003378	613.05	0.425407	0.164223	2.59042	0.00958583	0.793201	Grik5
ENSMUSG00000021911	1752.61	-0.295626	0.114133	-2.59019	0.00959239	0.793201	Parg
ENSMUSG00000096887	3412.56	-2.83023	1.09273	-2.59006	0.00959599	0.793201	Gm20594
ENSMUSG00000025268	2143.99	-0.294415	0.113824	-2.58658	0.00969336	0.797898	Maged2
ENSMUSG00000053644	1854.05	-0.375921	0.145491	-2.58381	0.00977162	0.798128	Aldh7a1
ENSMUSG00000035211	191.351	-0.747169	0.289196	-2.58361	0.0097773	0.798128	Xrra1
ENSMUSG00000020953	98.9036	-1.33675	0.51824	-2.5794	0.00989719	0.804576	Coch
ENSMUSG00000028197	3.5889	-4.74102	1.83914	-2.57785	0.00994185	0.80488	Col24a1
ENSMUSG00000046711	553.316	0.348745	0.135562	2.57258	0.0100944	0.81388	Hmga1
ENSMUSG00000063652	100.167	0.683025	0.265731	2.57037	0.0101591	0.815622	Slc22a21
ENSMUSG00000052302	93.7839	-0.997622	0.388364	-2.56878	0.0102056	0.815622	Tbc1d30
ENSMUSG00000014773	140.216	0.687392	0.267717	2.56761	0.0102404	0.815622	Dll1
ENSMUSG00000063952	2088.82	-0.406071	0.158352	-2.56436	0.0103368	0.81756	Brpf3
ENSMUSG00000049858	696.831	0.353929	0.138039	2.56398	0.0103478	0.81756	Suox
ENSMUSG00000028613	195.512	0.5019	0.195884	2.56224	0.0104	0.818401	Lrp8
ENSMUSG00000027612	118.087	0.80076	0.312699	2.56081	0.010443	0.818505	Mmp24
ENSMUSG00000020263	3553.8	-0.4393	0.171842	-2.55642	0.0105756	0.825613	Appl2
ENSMUSG00000070733	2777.07	-0.321332	0.125964	-2.55099	0.0107419	0.832323	Fryl
ENSMUSG00000028528	292.128	0.625318	0.245142	2.55085	0.0107462	0.832323	Dnajc6
ENSMUSG00000028072	291.157	0.670708	0.26345	2.54586	0.0109009	0.840995	Ntrk1
ENSMUSG00000032625	1096.33	0.322393	0.126778	2.54299	0.010991	0.842314	Thsd7a
ENSMUSG00000037095	161.734	0.604934	0.237938	2.5424	0.0110093	0.842314	Lrg1
ENSMUSG00000036591	2847.91	-0.358408	0.141038	-2.54123	0.0110465	0.842314	Arhgap21
ENSMUSG00000041594	308.054	0.518808	0.204608	2.53562	0.0112248	0.847991	Tmtc4
ENSMUSG00000034312	3567.07	0.382951	0.151103	2.53438	0.0112648	0.847991	Iqsec1
ENSMUSG00000036882	88.1873	0.762715	0.301052	2.5335	0.011293	0.847991	Arhgap33
ENSMUSG00000037720	2162.6	-0.300637	0.118665	-2.53349	0.0112933	0.847991	Tmem33
ENSMUSG00000071748	171.918	-0.58816	0.232432	-2.53046	0.0113913	0.851451	Styx-ps
ENSMUSG00000015647	1979.97	0.28332	0.112069	2.52808	0.0114688	0.851451	Lama5
ENSMUSG00000033981	587.928	0.397501	0.157253	2.52778	0.0114787	0.851451	Gria2
ENSMUSG00000082585	65.7915	-9.87384	3.90773	-2.52674	0.0115125	0.851451	NA
ENSMUSG00000001416	2457.48	-0.349644	0.138577	-2.52311	0.0116322	0.854167	Cct3
ENSMUSG00000037826	1611.31	-0.315811	0.125273	-2.52098	0.0117027	0.854167	Ppm1k
ENSMUSG00000039153	475.346	0.539665	0.214111	2.52049	0.0117191	0.854167	Runx2
ENSMUSG00000068739	1540.28	-0.298854	0.118695	-2.51784	0.0118077	0.854167	Sars
ENSMUSG00000040860	149.772	-0.624865	0.248255	-2.51703	0.0118349	0.854167	Crocc
ENSMUSG00000037664	5640.76	-0.529971	0.210619	-2.51625	0.0118611	0.854167	Cdkn1c
ENSMUSG00000055421	243.457	0.717515	0.285315	2.51481	0.0119095	0.854167	Pcdh9
ENSMUSG00000019590	4653.48	0.241166	0.0959585	2.51323	0.0119631	0.854167	Cyb561
ENSMUSG00000046694	63.4599	1.28301	0.51061	2.5127	0.0119811	0.854167	Tent5b
ENSMUSG00000116594	15.0637	2.04232	0.812822	2.51263	0.0119834	0.854167	NA
ENSMUSG00000002668	91.7104	0.841123	0.335065	2.51033	0.012062	0.856661	Dennd1c
ENSMUSG00000094006	4.61022	-5.08039	2.0277	-2.50549	0.0122283	0.863998	Igkv4-59
ENSMUSG00000023075	1407.48	0.3097	0.123717	2.50329	0.0123046	0.863998	Akirin1
ENSMUSG00000017734	150.69	0.583547	0.233144	2.50295	0.0123164	0.863998	Dbndd2
ENSMUSG00000057143	756.426	-0.331679	0.132625	-2.50088	0.0123883	0.863998	Trim12c
ENSMUSG00000091275	4.21851	4.08243	1.63318	2.49967	0.0124308	0.863998	NA
ENSMUSG00000038879	466.368	-0.369589	0.147896	-2.49899	0.012455	0.863998	Nipal2
ENSMUSG00000047746	15.9318	1.96289	0.785644	2.49844	0.012474	0.863998	Fbxo40
ENSMUSG00000034789	400.217	-0.432456	0.173174	-2.49723	0.0125166	0.863998	Rab24
ENSMUSG00000020135	314.431	0.427679	0.171382	2.49547	0.0125791	0.864464	Apc2
ENSMUSG00000022871	241.257	-0.832015	0.333532	-2.49456	0.0126113	0.864464	Fetub
ENSMUSG00000048186	404.031	-0.384463	0.15422	-2.49295	0.0126688	0.865395	Bend7
ENSMUSG00000028630	1198.4	-0.39228	0.157502	-2.49063	0.0127515	0.867123	Dyrk2
ENSMUSG00000072653	216.017	0.54676	0.219602	2.48978	0.0127823	0.867123	Zfp783
ENSMUSG00000073411	9251.17	0.311254	0.125333	2.48342	0.0130128	0.87973	H2-D1
ENSMUSG00000027074	1901.64	0.334652	0.134984	2.47919	0.0131682	0.88237	Slc43a3
ENSMUSG00000015837	18047	-0.23103	0.0933549	-2.47475	0.013333	0.88237	Sqstm1
ENSMUSG00000062061	69.2417	-1.16246	0.469832	-2.4742	0.0133534	0.88237	Obp2a
ENSMUSG00000031627	901.345	-0.349814	0.141649	-2.46958	0.013527	0.88237	Irf2
ENSMUSG00000033152	961.999	0.38283	0.155124	2.4679	0.0135907	0.88237	Podxl2
ENSMUSG00000045775	2.31214	-5.03719	2.04152	-2.46737	0.0136111	0.88237	Slc16a5
ENSMUSG00000042010	1886.93	0.303184	0.122878	2.46735	0.0136118	0.88237	Acacb
ENSMUSG00000000359	225.312	0.630903	0.255738	2.46699	0.0136254	0.88237	Rem1
ENSMUSG00000027722	473.846	-0.434318	0.176125	-2.46596	0.0136647	0.88237	Spata5
ENSMUSG00000007415	1621.46	-0.308086	0.124999	-2.4647	0.0137126	0.88237	Gatad1
ENSMUSG00000021062	134.055	0.573376	0.232785	2.46311	0.0137736	0.88237	Rab15
ENSMUSG00000032181	707.133	0.406896	0.165307	2.46146	0.0138375	0.88237	Scg3
ENSMUSG00000025277	1933.94	-0.269524	0.109574	-2.45975	0.0139032	0.88237	Abhd6
ENSMUSG00000030921	1133.87	-0.382772	0.15569	-2.45856	0.0139497	0.88237	Trim30a
ENSMUSG00000004460	844.099	-0.345941	0.140755	-2.45776	0.0139806	0.88237	Dnajb11
ENSMUSG00000027111	5414.89	-0.355678	0.144741	-2.45734	0.0139971	0.88237	Itga6
ENSMUSG00000031273	151.194	-0.561904	0.228874	-2.45508	0.0140853	0.88237	Col4a6
ENSMUSG00000024610	10323.5	0.381669	0.155494	2.45456	0.0141058	0.88237	Cd74
ENSMUSG00000074934	57.3023	1.61383	0.657607	2.45409	0.0141242	0.88237	Grem1
ENSMUSG00000019998	2624.4	0.27485	0.112005	2.4539	0.0141317	0.88237	Stx7
ENSMUSG00000021822	765.766	-0.561512	0.228955	-2.4525	0.0141867	0.88237	Plau
ENSMUSG00000031660	1010.86	-0.526299	0.214668	-2.45169	0.0142188	0.88237	Brd7
ENSMUSG00000112743	175.214	-0.689093	0.281132	-2.45114	0.0142405	0.88237	Nt5dc3
ENSMUSG00000016349	959.237	0.355158	0.14493	2.45056	0.0142636	0.88237	Eef1a2
ENSMUSG00000070691	147.406	0.840836	0.34332	2.44913	0.0143202	0.88237	Runx3
ENSMUSG00000049404	8.75347	3.35561	1.37014	2.4491	0.0143213	0.88237	Rarres1
ENSMUSG00000059921	638.073	0.417333	0.170412	2.44896	0.0143268	0.88237	Unc5c
ENSMUSG00000055214	26.2665	1.22866	0.502026	2.44741	0.0143887	0.88237	Pld5
ENSMUSG00000031936	78.008	-1.0246	0.418701	-2.44709	0.0144015	0.88237	Hephl1
ENSMUSG00000035021	401.958	0.539326	0.220404	2.44699	0.0144055	0.88237	Baz1a
ENSMUSG00000097789	3391.79	0.226998	0.0928525	2.44471	0.0144968	0.88237	Gm2115
ENSMUSG00000041014	228.892	0.45232	0.185111	2.4435	0.0145455	0.88237	Nrg3
ENSMUSG00000061911	89.1419	-0.89272	0.365458	-2.44274	0.0145762	0.88237	Myt1l
ENSMUSG00000061136	2868.5	-0.240006	0.0982666	-2.4424	0.01459	0.88237	Prpf40a
ENSMUSG00000089945	3224.74	-0.442701	0.181325	-2.44148	0.014627	0.88237	Pakap
ENSMUSG00000030306	1651.74	0.262876	0.107714	2.44051	0.0146665	0.88237	Tmtc1
ENSMUSG00000024900	7853.09	-0.273515	0.112396	-2.4335	0.0149537	0.892104	Cpt1a
ENSMUSG00000060962	104.998	0.803872	0.33037	2.43325	0.0149641	0.892104	Dmkn
ENSMUSG00000039728	352.7	0.664556	0.273116	2.43324	0.0149644	0.892104	Slc6a5
ENSMUSG00000071658	173.746	0.546324	0.224673	2.43164	0.0150307	0.892998	Gng3
ENSMUSG00000101298	2.85562	4.56986	1.88007	2.43069	0.0150702	0.892998	NA
ENSMUSG00000005045	682.667	0.367084	0.15121	2.42765	0.015197	0.897812	Chd5
ENSMUSG00000026576	1684.85	0.301053	0.124068	2.42653	0.0152442	0.897901	Atp1b1
ENSMUSG00000049106	1619.5	0.300585	0.123959	2.42487	0.0153139	0.899317	Dcaf5
ENSMUSG00000079022	234.149	0.548194	0.226361	2.42177	0.0154451	0.902364	Col22a1
ENSMUSG00000040896	518.491	0.569035	0.235177	2.4196	0.0155375	0.902364	Kcnd3
ENSMUSG00000028681	255.24	0.465711	0.192494	2.41935	0.0155483	0.902364	Ptch2
ENSMUSG00000043556	700.626	-0.370203	0.153022	-2.41928	0.0155514	0.902364	Fbxl7
ENSMUSG00000059208	1198.92	-0.325123	0.134481	-2.41761	0.0156227	0.902364	Hnrnpm
ENSMUSG00000022403	4407.44	-0.307601	0.127283	-2.41666	0.0156636	0.902364	St13
ENSMUSG00000036564	959.313	0.313346	0.12969	2.41612	0.0156869	0.902364	Ndrg4
ENSMUSG00000028416	1466.28	-0.343337	0.142427	-2.41061	0.0159258	0.903905	Bag1
ENSMUSG00000027487	214.268	-0.467461	0.194012	-2.40945	0.0159767	0.903905	Cdk5rap1
ENSMUSG00000020123	32.5615	1.43013	0.593603	2.40923	0.015986	0.903905	Avpr1a
ENSMUSG00000024824	219.058	0.482529	0.200355	2.40837	0.0160238	0.903905	Rad9a
ENSMUSG00000073792	248.564	0.4402	0.18286	2.40731	0.0160707	0.903905	Alg6
ENSMUSG00000031819	1121.82	0.476545	0.198008	2.40669	0.0160976	0.903905	Emc8
ENSMUSG00000032561	251.876	-0.685163	0.284744	-2.40624	0.0161178	0.903905	Acpp
ENSMUSG00000001918	761.289	0.455674	0.189474	2.40495	0.0161748	0.903905	Slc1a5
ENSMUSG00000074874	23.6687	1.26509	0.526164	2.40436	0.0162006	0.903905	Ctla2b
ENSMUSG00000027188	31.6952	-1.26302	0.525759	-2.40228	0.0162931	0.903905	Pamr1
ENSMUSG00000096780	176.214	0.60643	0.252486	2.40183	0.0163131	0.903905	NA
ENSMUSG00000034917	7.69517	2.7539	1.14792	2.39904	0.016438	0.903905	Tjp3
ENSMUSG00000039457	144.673	1.02219	0.426164	2.39859	0.0164582	0.903905	Ppl
ENSMUSG00000025862	3922.87	-0.249964	0.104233	-2.39812	0.0164793	0.903905	Stag2
ENSMUSG00000026435	721.736	0.518954	0.216482	2.39722	0.0165201	0.903905	Slc45a3
ENSMUSG00000040009	186.386	0.651596	0.2719	2.39646	0.0165543	0.903905	Gnaz
ENSMUSG00000073676	4565.03	-0.384565	0.160547	-2.39534	0.0166049	0.903905	Hspe1
ENSMUSG00000026670	522.772	0.380351	0.158806	2.39507	0.0166171	0.903905	Uap1
ENSMUSG00000048285	2401.55	0.433816	0.181284	2.39302	0.0167101	0.903905	Frmd6
ENSMUSG00000030102	8138.29	-0.2824	0.11813	-2.39059	0.0168215	0.903905	Itpr1
ENSMUSG00000036896	1379.32	0.419763	0.175627	2.39008	0.0168447	0.903905	C1qc
ENSMUSG00000059456	362.799	0.470286	0.196836	2.38923	0.0168837	0.903905	Ptk2b
ENSMUSG00000022184	256.069	0.461311	0.193097	2.38902	0.0168936	0.903905	Fbxo4
ENSMUSG00000020798	6.96189	-2.48461	1.04003	-2.38897	0.0168958	0.903905	Spns3
ENSMUSG00000025318	161.509	0.5846	0.244724	2.38882	0.0169028	0.903905	Jph3
ENSMUSG00000036856	6677.99	-0.311042	0.130214	-2.3887	0.0169083	0.903905	Wnt4
ENSMUSG00000032890	1198	0.353233	0.14828	2.38221	0.0172092	0.914289	Rims3
ENSMUSG00000031595	44.414	1.51518	0.637089	2.37829	0.0173934	0.914289	Pdgfrl
ENSMUSG00000021700	3491.69	0.262716	0.11047	2.37816	0.0173991	0.914289	Rab3c
ENSMUSG00000026879	7611.47	0.283216	0.119091	2.37814	0.0174002	0.914289	Gsn
ENSMUSG00000071324	40.7255	1.25005	0.52567	2.37802	0.017406	0.914289	Armc2
ENSMUSG00000037685	1138.14	0.43935	0.184818	2.37721	0.0174443	0.914289	Atp8a1
ENSMUSG00000000440	124.855	0.756532	0.31825	2.37716	0.0174463	0.914289	Pparg
ENSMUSG00000021055	47.3283	-1.09188	0.459456	-2.37646	0.0174795	0.914289	Esr2
ENSMUSG00000050211	13.4975	1.99955	0.842467	2.37344	0.0176232	0.914289	Pla2g4e
ENSMUSG00000018411	4104.09	-0.419713	0.176888	-2.37276	0.0176558	0.914289	Mapt
ENSMUSG00000050875	231.226	0.504152	0.212496	2.37252	0.0176671	0.914289	Minar2
ENSMUSG00000020642	776.484	-0.407399	0.171887	-2.37016	0.0177804	0.914289	Rnf144a
ENSMUSG00000060024	46.007	1.01911	0.430024	2.36989	0.0177935	0.914289	Vmn1r213
ENSMUSG00000050473	524.041	0.414964	0.175206	2.36844	0.0178634	0.914289	Slc35d3
ENSMUSG00000037995	84.4965	-0.823132	0.347658	-2.36765	0.0179014	0.914289	Igsf9
ENSMUSG00000023439	192.807	0.534472	0.225816	2.36685	0.0179403	0.914289	Gnb3
ENSMUSG00000014776	164.182	0.494081	0.208821	2.36605	0.0179792	0.914289	Nol3
ENSMUSG00000031157	821.846	-0.322018	0.136104	-2.36597	0.0179831	0.914289	Pqbp1
ENSMUSG00000001870	620.36	0.479892	0.202836	2.36592	0.0179856	0.914289	Ltbp1
ENSMUSG00000030209	21.1184	2.84381	1.20299	2.36396	0.0180808	0.915701	Grin2b
ENSMUSG00000026721	854.898	-0.309313	0.13091	-2.3628	0.0181376	0.915701	Rabgap1l
ENSMUSG00000001827	21.9183	-1.32618	0.561572	-2.36155	0.0181986	0.915701	Folr1
ENSMUSG00000020315	25346.2	-0.272171	0.11528	-2.36096	0.0182277	0.915701	Sptbn1
ENSMUSG00000031596	3563.45	0.420477	0.178124	2.36059	0.0182461	0.915701	Slc7a2
ENSMUSG00000057132	27.7434	-1.33181	0.565151	-2.35655	0.0184457	0.922919	Rpgrip1
ENSMUSG00000064267	166.146	0.724819	0.307828	2.35463	0.0185413	0.922919	Hvcn1
ENSMUSG00000072946	1405.01	-0.239405	0.101687	-2.35433	0.0185564	0.922919	Ptgr2
ENSMUSG00000030041	4.9596	-4.54289	1.93033	-2.35343	0.0186011	0.922919	M1ap
ENSMUSG00000020865	294.79	0.605378	0.257283	2.35296	0.0186244	0.922919	Abcc3
ENSMUSG00000063954	746.778	-0.371024	0.157892	-2.34985	0.0187809	0.928333	H2ac19
ENSMUSG00000102746	66.282	0.875596	0.372791	2.34876	0.0188359	0.928721	NA
ENSMUSG00000078495	398.348	-0.370125	0.157905	-2.34397	0.01908	0.931582	Zfp984
ENSMUSG00000040829	76.417	0.814264	0.347415	2.34378	0.0190895	0.931582	Zmynd15
ENSMUSG00000020990	38.3647	1.12823	0.481376	2.34375	0.0190908	0.931582	Cdkl1
ENSMUSG00000035640	941.578	0.363951	0.155326	2.34315	0.0191216	0.931582	Cbarp
ENSMUSG00000020892	18.3174	1.66326	0.709891	2.34297	0.0191307	0.931582	Aloxe3
ENSMUSG00000005882	1329.54	-0.304622	0.130189	-2.33984	0.0192921	0.93507	Uqcc1
ENSMUSG00000028459	103.255	-0.738728	0.315943	-2.33817	0.0193784	0.93507	Cd72
ENSMUSG00000072720	6.72291	2.96211	1.26854	2.33506	0.0195403	0.93507	Myo18b
ENSMUSG00000050822	782.149	0.476088	0.203921	2.33467	0.0195609	0.93507	Slc29a4
ENSMUSG00000112667	126.394	-0.636457	0.272687	-2.33402	0.0195948	0.93507	NA
ENSMUSG00000026219	9052.19	-0.214679	0.0920643	-2.33184	0.0197093	0.93507	Trip12
ENSMUSG00000024793	12.0446	-2.17008	0.930888	-2.3312	0.019743	0.93507	Tnfrsf25
ENSMUSG00000016940	1154.39	-0.355897	0.152749	-2.32994	0.0198094	0.93507	Kctd2
ENSMUSG00000018001	5655.5	-0.264363	0.113491	-2.32937	0.0198394	0.93507	Cyth3
ENSMUSG00000079435	382.139	-0.629821	0.270603	-2.32747	0.01994	0.93507	Rpl36a
ENSMUSG00000038206	764.556	-0.302076	0.129794	-2.32735	0.0199469	0.93507	Fbxo8
ENSMUSG00000002881	2338.66	-0.240067	0.103153	-2.32728	0.0199504	0.93507	Nab1
ENSMUSG00000096141	14.1627	2.71826	1.16837	2.32655	0.0199892	0.93507	Dnah7a
ENSMUSG00000022032	718.736	-0.391109	0.168107	-2.32654	0.0199896	0.93507	Scara5
ENSMUSG00000030522	933.215	0.344762	0.148199	2.32635	0.0199998	0.93507	Mtmr10
ENSMUSG00000006476	809.276	0.32697	0.140574	2.32596	0.0200208	0.93507	Nsmf
ENSMUSG00000113890	753.626	-0.318615	0.136995	-2.32574	0.0200325	0.93507	NA
ENSMUSG00000021666	867.741	-0.351502	0.151166	-2.32526	0.0200579	0.93507	Gfm2
ENSMUSG00000071226	297.896	-0.472738	0.20355	-2.32247	0.0202078	0.936053	Cecr2
ENSMUSG00000019471	2425.05	-0.298211	0.12843	-2.32198	0.0202341	0.936053	Cdc37
ENSMUSG00000047085	180.974	0.551589	0.237723	2.3203	0.0203247	0.936053	Lrrc4b
ENSMUSG00000004267	276.95	0.544968	0.234917	2.31983	0.02035	0.936053	Eno2
ENSMUSG00000039735	862.63	0.529431	0.228241	2.31962	0.0203616	0.936053	Fnbp1l
ENSMUSG00000004791	26.7231	1.16405	0.501949	2.31906	0.0203918	0.936053	Pgf
ENSMUSG00000074063	1672.64	0.386239	0.166639	2.31781	0.0204595	0.936053	Osgin1
ENSMUSG00000062861	145.602	0.755091	0.325778	2.31781	0.0204597	0.936053	Zfp28
ENSMUSG00000024502	307.116	0.493646	0.213096	2.31655	0.0205285	0.937025	Jakmip2
ENSMUSG00000061859	178.885	-0.595973	0.257607	-2.3135	0.0206954	0.941043	Patj
ENSMUSG00000033147	168.66	0.513955	0.222258	2.31242	0.0207545	0.941043	Slc22a15
ENSMUSG00000038486	391.866	0.453067	0.195959	2.31205	0.020775	0.941043	Sv2a
ENSMUSG00000089942	93.4339	0.901835	0.390159	2.31145	0.0208079	0.941043	Pira2
ENSMUSG00000067795	2.65505	4.45532	1.92888	2.3098	0.0208991	0.942999	4930444P10Rik
ENSMUSG00000025020	801.324	0.490246	0.212385	2.30829	0.0209829	0.943985	Slit1
ENSMUSG00000045078	2242.77	-0.279761	0.12123	-2.30768	0.0210169	0.943985	Rnf216
ENSMUSG00000045193	1049.42	0.335762	0.145571	2.30652	0.0210818	0.944742	Cirbp
ENSMUSG00000006574	11.4071	-2.2936	0.995377	-2.30426	0.0212083	0.94516	Slc4a1
ENSMUSG00000020902	1199.54	0.307634	0.133574	2.30309	0.0212735	0.94516	Ntn1
ENSMUSG00000092049	27.9556	1.12884	0.490168	2.30297	0.0212805	0.94516	Vmn2r4
ENSMUSG00000025733	2043.31	-0.307563	0.133554	-2.30292	0.0212833	0.94516	Rhot2
ENSMUSG00000079017	499.839	0.567973	0.246869	2.30071	0.0214082	0.948565	Ifi27l2a
ENSMUSG00000026797	1054.73	0.271893	0.118229	2.29971	0.0214645	0.948736	Stxbp1
ENSMUSG00000000889	9708.54	0.227923	0.0991428	2.29894	0.0215085	0.948736	Dbh
ENSMUSG00000062380	119.777	1.01982	0.444163	2.29605	0.0216728	0.953845	Tubb3
ENSMUSG00000025876	533.847	0.392883	0.171227	2.29452	0.0217607	0.955577	Unc5a
ENSMUSG00000059854	27.4212	-1.42067	0.619686	-2.29256	0.0218735	0.957482	Hydin
ENSMUSG00000022756	255.329	0.781117	0.34079	2.29207	0.0219014	0.957482	Slc7a4
ENSMUSG00000022013	2627.13	-0.385915	0.168541	-2.28974	0.0220362	0.960373	Dnajc15
ENSMUSG00000079442	276.824	0.555484	0.24265	2.28924	0.0220652	0.960373	St6galnac4
ENSMUSG00000008450	216.3	-0.496776	0.217182	-2.28737	0.022174	0.962976	Nutf2
ENSMUSG00000028354	324.586	0.451415	0.197595	2.28454	0.0223395	0.965479	Fmn2
ENSMUSG00000024975	2519.39	-0.322499	0.141182	-2.28428	0.0223552	0.965479	Pdcd4
ENSMUSG00000082381	3.90764	-5.75432	2.52029	-2.2832	0.0224188	0.965479	NA
ENSMUSG00000020572	5220.74	-0.4071	0.178343	-2.28269	0.0224488	0.965479	Nampt
ENSMUSG00000047250	370.538	0.346241	0.151728	2.28199	0.0224898	0.965479	Ptgs1
ENSMUSG00000006651	954.474	0.299776	0.131457	2.28041	0.0225833	0.965479	Aplp1
ENSMUSG00000039382	727.462	-0.288929	0.126723	-2.28	0.0226078	0.965479	Wdr45
ENSMUSG00000032999	11.3486	-2.23094	0.978917	-2.27899	0.0226677	0.965479	Nlrp4f
ENSMUSG00000041020	107.132	0.597438	0.262161	2.2789	0.0226733	0.965479	Map7d2
ENSMUSG00000033327	3410.07	0.343489	0.150877	2.27661	0.0228096	0.967858	Tnxb
ENSMUSG00000034430	760.341	0.338523	0.148776	2.27539	0.0228828	0.967858	Zxdc
ENSMUSG00000089901	3909.56	-0.534247	0.234855	-2.27479	0.0229184	0.967858	NA
ENSMUSG00000060923	222.02	-0.469428	0.206409	-2.27426	0.0229502	0.967858	Acyp2
ENSMUSG00000037353	1292.55	0.294151	0.12938	2.27355	0.0229932	0.967858	Letmd1
ENSMUSG00000066952	8.21627	2.40349	1.05739	2.27303	0.0230243	0.967858	Myo1h
ENSMUSG00000047181	255.443	0.43096	0.18994	2.26893	0.0232728	0.972594	Samd14
ENSMUSG00000056476	923.438	-0.277506	0.122349	-2.26816	0.0233194	0.972594	Med12l
ENSMUSG00000070644	171.285	0.735032	0.324093	2.26797	0.0233311	0.972594	Etnk2
ENSMUSG00000034883	2.79017	-3.90639	1.72279	-2.26748	0.0233612	0.972594	Lrr1
ENSMUSG00000015747	427.763	-0.387251	0.170831	-2.26687	0.0233982	0.972594	Vps45
ENSMUSG00000050608	758.013	-0.438415	0.19345	-2.26629	0.0234336	0.972594	Micos10
ENSMUSG00000015932	5815.39	-0.227643	0.100505	-2.26499	0.0235135	0.973855	Dstn
ENSMUSG00000056629	342.33	-0.711675	0.314815	-2.26061	0.0237831	0.975708	Fkbp2
ENSMUSG00000027950	301.42	0.382057	0.169098	2.25938	0.0238595	0.975708	Chrnb2
ENSMUSG00000032186	1117.34	0.320289	0.141785	2.25898	0.0238844	0.975708	Tmod2
ENSMUSG00000022226	19.5589	-1.43851	0.636971	-2.25836	0.0239231	0.975708	Mcpt2
ENSMUSG00000027281	259.09	-0.432833	0.191688	-2.25801	0.0239452	0.975708	Slx4ip
ENSMUSG00000074646	25.5614	1.1621	0.514679	2.25791	0.0239511	0.975708	6430550D23Rik
ENSMUSG00000081476	10.2088	-2.75281	1.21982	-2.25673	0.0240248	0.975708	NA
ENSMUSG00000025425	38.4561	1.99754	0.885718	2.25528	0.0241159	0.975708	St8sia5
ENSMUSG00000002910	160.967	0.605802	0.268664	2.25487	0.0241414	0.975708	Arrdc2
ENSMUSG00000040283	1669.84	-0.265729	0.117866	-2.25449	0.0241651	0.975708	Btnl9
ENSMUSG00000005142	2039.98	0.247523	0.109792	2.25448	0.0241662	0.975708	Man2b1
ENSMUSG00000036959	825.845	-0.372241	0.165151	-2.25394	0.0241998	0.975708	Bcorl1
ENSMUSG00000040270	222.298	-0.646936	0.287382	-2.25113	0.0243771	0.975708	Bach2
ENSMUSG00000027533	290.558	0.697458	0.309897	2.25061	0.0244101	0.975708	Fabp5
ENSMUSG00000012609	605.797	-0.305175	0.135597	-2.25061	0.0244102	0.975708	Ttll5
ENSMUSG00000018169	194.782	0.464113	0.206262	2.25011	0.0244417	0.975708	Mfng
ENSMUSG00000040084	163.574	0.920619	0.409207	2.24976	0.024464	0.975708	Bub1b
ENSMUSG00000004151	3764.57	-0.368185	0.163686	-2.24933	0.0244914	0.975708	Etv1
ENSMUSG00000026473	16929.6	0.296219	0.131726	2.24874	0.024529	0.975708	Glul
ENSMUSG00000039004	242.801	0.537345	0.238989	2.24841	0.0245502	0.975708	Bmp6
ENSMUSG00000020534	1210.35	-0.511981	0.227823	-2.24727	0.0246227	0.976619	Shmt1
ENSMUSG00000052609	210.637	0.510397	0.227306	2.24542	0.024741	0.977902	Plekhg3
ENSMUSG00000030055	1300.78	0.276715	0.123265	2.24487	0.0247763	0.977902	Rab43
ENSMUSG00000095724	4.43791	-3.08787	1.37687	-2.24267	0.024918	0.977902	Eif1ad19
ENSMUSG00000041375	495.664	-0.480814	0.214432	-2.24227	0.0249437	0.977902	Ccdc9
ENSMUSG00000042078	94.4372	0.634018	0.282817	2.24179	0.0249747	0.977902	Svop
ENSMUSG00000029778	2545.41	0.296927	0.132476	2.24137	0.0250024	0.977902	Adcyap1r1
ENSMUSG00000049327	2041.68	-0.309131	0.137933	-2.24116	0.0250157	0.977902	Kmt5a
ENSMUSG00000052305	46.1932	-1.22039	0.544676	-2.24059	0.0250528	0.977902	Hbb-b1
ENSMUSG00000074165	392.459	0.478837	0.214159	2.23589	0.0253589	0.987871	Zfp788
ENSMUSG00000026575	308.916	0.479987	0.214787	2.23472	0.0254359	0.987871	Nme7
ENSMUSG00000027894	377.867	0.526446	0.235645	2.23407	0.0254785	0.987871	Slc6a17
ENSMUSG00000005667	192.543	0.571474	0.255853	2.23361	0.025509	0.987871	Mthfd2
ENSMUSG00000024858	1359.32	0.282781	0.126752	2.23098	0.0256822	0.988138	Grk2
ENSMUSG00000036585	1107.81	0.507833	0.227637	2.23089	0.0256887	0.988138	Fgf1
ENSMUSG00000057897	705.447	0.432936	0.194072	2.2308	0.0256941	0.988138	Camk2b
ENSMUSG00000026904	245.592	0.497022	0.222834	2.23046	0.0257168	0.988138	Slc4a10
ENSMUSG00000033220	218.883	0.660783	0.296694	2.22715	0.025937	0.993157	Rac2
ENSMUSG00000028312	386.82	-0.469437	0.210859	-2.2263	0.0259938	0.993157	Smc2
ENSMUSG00000000804	2866.41	-0.29242	0.131367	-2.22597	0.0260163	0.993157	Usp32
ENSMUSG00000073664	6256.76	-0.252687	0.113628	-2.2238	0.0261616	0.993157	Nbeal1
ENSMUSG00000032051	6007.49	0.360098	0.161983	2.22306	0.0262121	0.993157	Fdx1
ENSMUSG00000021273	761.656	-0.342078	0.153888	-2.22291	0.026222	0.993157	Fdft1
ENSMUSG00000026939	183.935	-0.478261	0.215154	-2.22288	0.0262241	0.993157	Tmem141
ENSMUSG00000024867	535.156	-0.374244	0.16851	-2.2209	0.0263579	0.993157	Pip5k1b
ENSMUSG00000116165	152.031	0.480773	0.216533	2.22032	0.0263968	0.993157	Pdxp
ENSMUSG00000020257	2468.2	0.294523	0.13265	2.2203	0.0263984	0.993157	Wdr82
ENSMUSG00000057614	811.2	-0.409902	0.184621	-2.22024	0.0264028	0.993157	Gnai1
ENSMUSG00000061536	363.105	-0.61883	0.279149	-2.21684	0.0266338	0.993647	Sec22c
ENSMUSG00000044072	358.134	0.41019	0.185034	2.21683	0.0266348	0.993647	Eml6
ENSMUSG00000025887	2102.68	-0.270059	0.121878	-2.21582	0.026704	0.993647	Casp12
ENSMUSG00000101355	55.6672	0.821583	0.370938	2.21488	0.0267684	0.993647	H3c10
ENSMUSG00000021913	525.819	0.338914	0.153021	2.21482	0.0267724	0.993647	Ogdhl
ENSMUSG00000042510	174.874	0.76881	0.347137	2.21472	0.0267794	0.993647	AA986860
ENSMUSG00000034673	892.2	0.345999	0.156356	2.21288	0.0269056	0.993647	Pbx2
ENSMUSG00000037926	1334.85	0.276209	0.12483	2.21268	0.0269198	0.993647	Ssh2
ENSMUSG00000030889	35.0208	-1.12998	0.510839	-2.21201	0.0269659	0.993647	Vwa3a
ENSMUSG00000096916	111.729	0.595304	0.269139	2.21188	0.0269749	0.993647	Zfp850
ENSMUSG00000015484	509.759	0.30301	0.137046	2.211	0.0270355	0.993647	Fam163a
ENSMUSG00000058297	4220.74	0.238694	0.10803	2.20951	0.027139	0.993647	Spock2
ENSMUSG00000062785	241.916	0.499646	0.226151	2.20935	0.0271504	0.993647	Kcnc3
ENSMUSG00000042333	179.669	0.447953	0.202778	2.20908	0.027169	0.993647	Tnfrsf14
ENSMUSG00000005973	2024.57	-0.369399	0.167252	-2.20863	0.0272001	0.993647	Rcn1
ENSMUSG00000031639	475.184	0.380121	0.172184	2.20765	0.0272688	0.993647	Tlr3
ENSMUSG00000054626	20.3817	-1.65266	0.748972	-2.20657	0.0273441	0.993647	Xlr
ENSMUSG00000050103	67.3674	0.725047	0.328635	2.20624	0.0273675	0.993647	Agmo
ENSMUSG00000024747	289.71	2.46541	1.11753	2.20612	0.0273754	0.993647	Aldh1a7
ENSMUSG00000037747	69.4639	0.764469	0.346903	2.2037	0.0275456	0.99742	Phyhipl
ENSMUSG00000032507	75.5062	0.933172	0.423553	2.2032	0.0275808	0.99742	Fbxl2
ENSMUSG00000033306	10570.3	-0.364799	0.165712	-2.2014	0.0277079	0.999931	Lpp
ENSMUSG00000028427	105.726	0.56396	0.256255	2.20078	0.0277518	0.999931	Aqp7
ENSMUSG00000034098	435.112	0.456541	0.207717	2.1979	0.0279564	0.999962	Fstl5
ENSMUSG00000022973	1269.93	0.322145	0.146589	2.19761	0.0279768	0.999962	Synj1
ENSMUSG00000029363	152.828	0.516306	0.235128	2.19585	0.0281028	0.999962	Rfc5
ENSMUSG00000054874	3703.84	0.215018	0.0979209	2.19583	0.0281042	0.999962	Pcnx3
ENSMUSG00000058900	192.395	-0.598319	0.272599	-2.19487	0.0281731	0.999962	Rsl1
ENSMUSG00000028059	755.403	0.469778	0.214117	2.19402	0.0282337	0.999962	Arhgef2
ENSMUSG00000054988	334.673	0.529439	0.241426	2.19297	0.0283097	0.999962	Agtr1b
ENSMUSG00000017466	4982.87	0.35396	0.161479	2.19198	0.0283807	0.999962	Timp2
ENSMUSG00000069755	257.92	-0.409932	0.187067	-2.19136	0.0284259	0.999962	3110053B16Rik
ENSMUSG00000045284	229.336	0.413955	0.188924	2.19112	0.0284431	0.999962	Dcaf12l1
ENSMUSG00000022241	795.649	-0.425009	0.194067	-2.19001	0.0285235	0.999962	Tars
ENSMUSG00000018040	1588.94	0.260192	0.118892	2.18847	0.0286352	0.999962	Rrp7a
ENSMUSG00000022236	28.3434	-1.02644	0.46912	-2.18802	0.0286684	0.999962	Ropn1l
ENSMUSG00000058756	1549.76	0.234358	0.107124	2.18773	0.0286892	0.999962	Thra
ENSMUSG00000045532	718.13	0.313526	0.143371	2.18682	0.028756	0.999962	C1ql1
ENSMUSG00000054728	384.085	0.517302	0.236608	2.18632	0.0287922	0.999962	Phactr1
ENSMUSG00000002812	3670.48	-0.229432	0.10494	-2.18632	0.0287922	0.999962	Flii
ENSMUSG00000038102	1511.27	-0.252017	0.115318	-2.18542	0.0288583	0.999962	Trappc11
ENSMUSG00000021886	132.067	0.558083	0.255454	2.18467	0.0289132	0.999962	Gpr65
ENSMUSG00000041959	997.656	-0.351193	0.160767	-2.18449	0.0289263	0.999962	S100a10
ENSMUSG00000032269	149.654	0.658241	0.301412	2.18385	0.0289729	0.999962	Htr3a
ENSMUSG00000035493	1878.98	0.445851	0.204193	2.18348	0.0290008	0.999962	Tgfbi
ENSMUSG00000022761	1606.85	0.262872	0.120415	2.18304	0.0290329	0.999962	Lztr1
ENSMUSG00000039611	196.874	0.425002	0.194801	2.18173	0.0291295	0.999962	Pgap4
ENSMUSG00000022324	1247.52	0.387739	0.177852	2.18012	0.0292487	0.999962	Matn2
ENSMUSG00000054672	3.43036	-3.23077	1.48198	-2.18004	0.0292549	0.999962	Scart2
ENSMUSG00000020785	232.777	0.533758	0.244918	2.17934	0.0293067	0.999962	Camkk1
ENSMUSG00000052102	1058.83	0.466583	0.214379	2.17644	0.0295224	0.999962	Gnpda1
ENSMUSG00000028121	1620.31	0.257477	0.118329	2.17595	0.0295593	0.999962	Bcar3
ENSMUSG00000014551	482.079	-0.387717	0.178314	-2.17435	0.0296785	0.999962	Mrps25
ENSMUSG00000034926	7540.59	-0.407012	0.187197	-2.17425	0.0296866	0.999962	Dhcr24
ENSMUSG00000028843	975.577	0.269426	0.123921	2.17418	0.0296917	0.999962	Sh3bgrl3
ENSMUSG00000035403	25.7437	-1.89086	0.870155	-2.17301	0.0297793	0.999962	Crb2
ENSMUSG00000039620	127.149	-0.596061	0.274321	-2.17286	0.0297908	0.999962	Trmt9b
ENSMUSG00000082160	3.51687	-5.60002	2.5782	-2.17206	0.029851	0.999962	NA
ENSMUSG00000060586	3082.86	0.383418	0.176527	2.17201	0.0298548	0.999962	H2-Eb1
ENSMUSG00000033737	5.58704	2.94185	1.35546	2.17037	0.0299786	0.999962	Fndc3c1
ENSMUSG00000060548	3203.93	-0.383739	0.176839	-2.16999	0.0300074	0.999962	Tnfrsf19
ENSMUSG00000031150	65.0358	0.806641	0.371745	2.16988	0.0300161	0.999962	Ccdc120
ENSMUSG00000040964	508.625	0.455386	0.209986	2.16865	0.0301096	0.999962	Arhgef10l
ENSMUSG00000019868	565.529	-0.392504	0.181008	-2.16844	0.0301255	0.999962	Vta1
ENSMUSG00000047497	193.313	-0.527728	0.243457	-2.16764	0.0301858	0.999962	Adamts12
ENSMUSG00000018845	145.938	-0.562731	0.259623	-2.16749	0.0301974	0.999962	Unc45b
ENSMUSG00000076441	391.42	0.373508	0.172323	2.16749	0.0301976	0.999962	Ass1
ENSMUSG00000018102	1003.31	-0.361384	0.166741	-2.16734	0.0302091	0.999962	H2bc4
ENSMUSG00000019966	2117.76	-0.372887	0.172138	-2.16621	0.030295	0.999962	Kitl
ENSMUSG00000026944	2969.56	0.202318	0.0934416	2.16518	0.0303737	0.999962	Abca2
ENSMUSG00000068105	4.77741	-2.71037	1.2518	-2.16518	0.0303738	0.999962	Tnfrsf13c
ENSMUSG00000031144	1365.53	0.27011	0.124802	2.1643	0.0304414	0.999962	Syp
ENSMUSG00000000392	70.7805	0.752525	0.347725	2.16414	0.0304538	0.999962	Fap
ENSMUSG00000028698	1064.84	0.331598	0.153237	2.16395	0.0304678	0.999962	Pik3r3
ENSMUSG00000024079	1395.52	-0.229084	0.105996	-2.16125	0.0306762	0.999962	Eif2ak2
ENSMUSG00000029726	1264.83	0.301318	0.13945	2.16077	0.0307135	0.999962	Mepce
ENSMUSG00000039485	776.484	0.341153	0.157942	2.15999	0.0307738	0.999962	Tspyl4
ENSMUSG00000096914	16.5161	1.58106	0.732196	2.15933	0.0308244	0.999962	Galntl6
ENSMUSG00000048636	34.3048	-0.97288	0.450552	-2.15931	0.0308264	0.999962	A730049H05Rik
ENSMUSG00000027956	250.168	-0.490972	0.227446	-2.15864	0.0308784	0.999962	Tmem144
ENSMUSG00000042254	239.55	0.434809	0.201454	2.15835	0.0309007	0.999962	Cilp
ENSMUSG00000061171	563.08	0.37737	0.174882	2.15785	0.0309394	0.999962	Slc38a11
ENSMUSG00000031227	639.809	0.268927	0.124644	2.15756	0.0309624	0.999962	Magee1
ENSMUSG00000028455	1245.94	-0.35216	0.163236	-2.15737	0.030977	0.999962	Stoml2
ENSMUSG00000028977	324.047	0.440536	0.204218	2.15718	0.0309915	0.999962	Casz1
ENSMUSG00000037224	23.5951	1.2103	0.561185	2.1567	0.0310294	0.999962	Zfyve28
ENSMUSG00000035208	688.573	-0.437619	0.202985	-2.15591	0.0310903	0.999962	Slfn8
ENSMUSG00000051149	1062.42	0.335783	0.155799	2.15524	0.0311431	0.999962	Adnp
ENSMUSG00000026269	1718.97	-0.33102	0.153608	-2.15496	0.0311649	0.999962	Rnpepl1
ENSMUSG00000051726	17.9319	1.95757	0.908883	2.15382	0.0312547	0.999962	Kcnf1
ENSMUSG00000028555	167.572	0.534417	0.248218	2.15301	0.0313177	0.999962	Ttc39a
ENSMUSG00000032006	1868.67	-0.382516	0.177734	-2.15218	0.0313832	0.999962	Pdgfd
ENSMUSG00000037960	300.201	0.460266	0.213916	2.15162	0.0314272	0.999962	Card19
ENSMUSG00000045440	88.4243	0.918349	0.426833	2.15154	0.0314334	0.999962	Insm2
ENSMUSG00000024410	778.13	0.30454	0.1416	2.15071	0.031499	0.999962	Rmc1
ENSMUSG00000070604	58.7952	1.27218	0.591708	2.15002	0.0315536	0.999962	Vsig10l
ENSMUSG00000020821	7000.98	-0.315219	0.146693	-2.14883	0.0316481	0.999962	Kif1c
ENSMUSG00000024810	495.555	0.467537	0.217661	2.148	0.0317135	0.999962	Il33
ENSMUSG00000041168	9035.82	-0.249285	0.116145	-2.14632	0.0318475	0.999962	Lonp1
ENSMUSG00000033938	408.988	-0.493488	0.230072	-2.14493	0.0319587	0.999962	Ndufb7
ENSMUSG00000010095	2758.02	0.22322	0.10409	2.14449	0.0319939	0.999962	Slc3a2
ENSMUSG00000113450	319.898	-0.349805	0.163138	-2.14423	0.0320148	0.999962	Zfp935
ENSMUSG00000029247	4141.07	-0.256528	0.119641	-2.14415	0.0320206	0.999962	Paics
ENSMUSG00000015134	566.334	0.302158	0.140928	2.14406	0.0320283	0.999962	Aldh1a3
ENSMUSG00000032965	514.126	-0.345937	0.161433	-2.14292	0.0321197	0.999962	Ift57
ENSMUSG00000060550	958.057	0.408091	0.190451	2.14277	0.0321319	0.999962	H2-Q7
ENSMUSG00000015709	2474.94	0.325313	0.151855	2.14226	0.0321723	0.999962	Arnt2
ENSMUSG00000040794	20.741	1.25716	0.587086	2.14136	0.0322448	0.999962	C1qtnf4
ENSMUSG00000028600	234.168	0.465129	0.217224	2.14124	0.0322546	0.999962	Podn
ENSMUSG00000021952	2232.11	-0.228581	0.106789	-2.1405	0.0323144	0.999962	Xpo4
ENSMUSG00000041842	155.057	-0.661723	0.309207	-2.14006	0.0323497	0.999962	Fhdc1
ENSMUSG00000026587	1131.39	0.249554	0.116643	2.13946	0.0323986	0.999962	Astn1
ENSMUSG00000043259	580.362	0.372134	0.173996	2.13875	0.032456	0.999962	Fam13c
ENSMUSG00000026247	17.2618	2.2766	1.06454	2.13857	0.0324705	0.999962	Ecel1
ENSMUSG00000037196	63.6789	0.710402	0.332276	2.13799	0.0325177	0.999962	Pacrg
ENSMUSG00000083364	3.19938	-5.52561	2.58526	-2.13736	0.032569	0.999962	NA
ENSMUSG00000015222	1176.58	0.285223	0.133495	2.13659	0.0326313	0.999962	Map2
ENSMUSG00000005107	74.9562	0.722235	0.33806	2.13641	0.0326458	0.999962	Slc2a9
ENSMUSG00000001995	4110.19	-0.261733	0.122667	-2.13369	0.0328683	0.999962	Sipa1l2
ENSMUSG00000027985	605.905	-0.437529	0.205096	-2.13329	0.0329009	0.999962	Lef1
ENSMUSG00000114278	70.5066	0.859434	0.402897	2.13313	0.0329138	0.999962	NA
ENSMUSG00000040482	461.676	0.305148	0.143097	2.13246	0.0329691	0.999962	Dxo
ENSMUSG00000038175	313.103	0.351046	0.164706	2.13135	0.0330607	0.999962	Mylip
ENSMUSG00000032475	707.245	-0.303039	0.142265	-2.13011	0.0331628	0.999962	Nck1
ENSMUSG00000003418	78.1116	0.967331	0.454696	2.12743	0.0333848	0.999962	St8sia6
ENSMUSG00000021870	2730.16	-0.264217	0.12422	-2.12701	0.0334192	0.999962	Slmap
ENSMUSG00000052906	592.282	-0.32848	0.154459	-2.12665	0.0334493	0.999962	Ubxn8
ENSMUSG00000029191	1759.82	-0.276286	0.129984	-2.12554	0.0335416	0.999962	Rfc1
ENSMUSG00000031824	5293.33	-0.329543	0.155144	-2.12411	0.0336613	0.999962	6430548M08Rik
ENSMUSG00000095789	23.9223	1.33125	0.626924	2.12346	0.0337154	0.999962	Nupr1l
ENSMUSG00000034591	377.132	0.357341	0.168439	2.12149	0.0338805	0.999962	Slc41a2
ENSMUSG00000038607	372.863	0.361331	0.17037	2.12086	0.0339338	0.999962	Gng10
ENSMUSG00000019837	603.768	-0.312211	0.147288	-2.11973	0.0340285	0.999962	Gtf3c6
ENSMUSG00000005686	979.876	0.344622	0.162666	2.11859	0.0341252	0.999962	Ampd3
ENSMUSG00000003955	523.433	-0.303013	0.143159	-2.11662	0.0342918	0.999962	Fam162a
ENSMUSG00000026437	775.37	0.408349	0.192946	2.11639	0.0343114	0.999962	Cdk18
ENSMUSG00000073409	535.038	0.448286	0.211834	2.11622	0.0343264	0.999962	H2-Q6
ENSMUSG00000063430	258.887	0.389271	0.183947	2.11622	0.0343265	0.999962	Wscd2
ENSMUSG00000026857	515.042	-0.300377	0.141977	-2.11567	0.0343725	0.999962	Ntmt1
ENSMUSG00000035615	417.377	0.471098	0.222983	2.11271	0.0346259	0.999962	Frmpd1
ENSMUSG00000078967	18.8574	-1.3922	0.658983	-2.11265	0.0346309	0.999962	Gapdh-ps16
ENSMUSG00000038745	90.1345	0.614792	0.291126	2.11178	0.0347057	0.999962	Nlrp6
ENSMUSG00000049555	93.4565	0.793427	0.37602	2.11006	0.0348528	0.999962	Tmie
ENSMUSG00000055033	74.014	0.835353	0.395929	2.10986	0.0348708	0.999962	Olfr420
ENSMUSG00000050663	5.97153	2.38871	1.13348	2.10741	0.0350823	0.999962	Trhde
ENSMUSG00000021427	6638.11	-0.193782	0.0919754	-2.10689	0.0351271	0.999962	Ssr1
ENSMUSG00000018593	33193.3	-0.276327	0.131197	-2.10619	0.0351875	0.999962	Sparc
ENSMUSG00000008976	1401.54	-0.235947	0.112033	-2.10606	0.0351995	0.999962	Gabpa
ENSMUSG00000030935	160.629	-0.744201	0.353735	-2.10384	0.0353927	0.999962	Acsm3
ENSMUSG00000067288	2221.47	-0.29208	0.138862	-2.10339	0.0354316	0.999962	Rps28
ENSMUSG00000022261	3906.53	-0.255899	0.121771	-2.10147	0.0355995	0.999962	Sdc2
ENSMUSG00000031833	801.815	0.288879	0.137605	2.09934	0.0357868	0.999962	Mast3
ENSMUSG00000003153	401.072	0.49114	0.23395	2.09934	0.0357871	0.999962	Slc2a3
ENSMUSG00000057110	588.599	-0.352848	0.168101	-2.09902	0.0358151	0.999962	Cntrl
ENSMUSG00000030086	317.674	0.408255	0.194502	2.09898	0.0358191	0.999962	Chchd6
ENSMUSG00000019368	27.4322	-1.30805	0.623197	-2.09893	0.0358232	0.999962	Sec14l4
ENSMUSG00000029657	2285.57	-0.339953	0.162045	-2.09789	0.0359144	0.999962	Hsph1
ENSMUSG00000046709	220.912	0.617343	0.294314	2.09756	0.0359438	0.999962	Mapk10
ENSMUSG00000039354	1234.2	-0.275419	0.13132	-2.09731	0.0359661	0.999962	Smarcal1
ENSMUSG00000036611	955.236	-0.357174	0.170309	-2.09722	0.0359745	0.999962	Eepd1
ENSMUSG00000032384	1027.16	0.284424	0.135622	2.09719	0.0359769	0.999962	Csnk1g1
ENSMUSG00000030655	4683.27	-0.207918	0.0991509	-2.09699	0.0359947	0.999962	Smg1
ENSMUSG00000031939	1236.25	-0.235449	0.112314	-2.09634	0.0360523	0.999962	Taf1d
ENSMUSG00000060579	91.0436	-0.555131	0.264836	-2.09613	0.0360708	0.999962	Fhit
ENSMUSG00000027544	292.06	0.394635	0.188298	2.0958	0.0361002	0.999962	Nfatc2
ENSMUSG00000046351	717.134	-0.263014	0.125532	-2.0952	0.0361535	0.999962	Zfp322a
ENSMUSG00000026110	502.155	0.383074	0.182885	2.09462	0.0362049	0.999962	Mgat4a
ENSMUSG00000034780	170.427	0.496929	0.23725	2.09454	0.0362122	0.999962	B3galt1
ENSMUSG00000025078	1264.55	0.237417	0.113371	2.09415	0.0362464	0.999962	Nhlrc2
ENSMUSG00000090231	179.938	0.448707	0.214281	2.09402	0.0362585	0.999962	Cfb
ENSMUSG00000045102	16.3136	1.90093	0.907998	2.09354	0.0363009	0.999962	Poln
ENSMUSG00000000253	173.378	0.478208	0.228436	2.0934	0.0363133	0.999962	Gmpr
ENSMUSG00000055430	579.893	0.309556	0.147941	2.09242	0.0364007	0.999962	Nap1l5
ENSMUSG00000021468	1647.76	-0.232929	0.111334	-2.09217	0.0364236	0.999962	Sptlc1
ENSMUSG00000044328	164.165	0.445034	0.212743	2.09188	0.0364491	0.999962	Trp53i13
ENSMUSG00000036371	3369	-0.464387	0.222213	-2.08983	0.0366332	0.999962	Serbp1
ENSMUSG00000019027	64.698	0.826103	0.395358	2.08951	0.036662	0.999962	Dnah1
ENSMUSG00000031391	551.229	0.394225	0.188674	2.08945	0.0366673	0.999962	L1cam
ENSMUSG00000038034	492.753	0.384	0.183793	2.08931	0.0366797	0.999962	Igsf8
ENSMUSG00000026113	1091.43	0.368857	0.176551	2.08924	0.0366861	0.999962	Inpp4a
ENSMUSG00000035919	332.31	0.415969	0.199143	2.0888	0.0367257	0.999962	Bbs9
ENSMUSG00000035284	3742.77	-0.194318	0.0930544	-2.08822	0.0367783	0.999962	Vps13c
ENSMUSG00000022724	394.392	-0.323463	0.15492	-2.08793	0.0368041	0.999962	Riox2
ENSMUSG00000091405	523.863	0.355444	0.17026	2.08765	0.0368291	0.999962	H4c14
ENSMUSG00000040242	2065.28	-0.209769	0.100482	-2.08764	0.0368306	0.999962	Fgfr1op2
ENSMUSG00000005514	6826.3	-0.269762	0.129235	-2.08737	0.0368549	0.999962	Por
ENSMUSG00000023272	274.564	-0.346322	0.16607	-2.0854	0.0370333	0.999962	Creld2
ENSMUSG00000074923	941.61	-0.289046	0.138665	-2.08449	0.0371155	0.999962	Pak6
ENSMUSG00000021614	136.501	-0.765057	0.367395	-2.08238	0.0373074	0.999962	Vcan
ENSMUSG00000028969	541.162	0.303257	0.145651	2.08208	0.0373354	0.999962	Cdk5
ENSMUSG00000038264	961.17	0.367697	0.176792	2.07983	0.0375407	0.999962	Sema7a
ENSMUSG00000031451	7774.57	-0.262481	0.12629	-2.07839	0.037673	0.999962	Gas6
ENSMUSG00000040035	2959.57	0.256495	0.1239	2.07018	0.0384352	0.999962	Disp2
ENSMUSG00000054757	4.61681	-2.51863	1.21708	-2.0694	0.0385087	0.999962	Akr1c20
ENSMUSG00000024002	3712.37	-0.225095	0.108791	-2.06907	0.0385396	0.999962	Brd4
ENSMUSG00000025085	1383.04	-0.412159	0.199249	-2.06856	0.0385873	0.999962	Ablim1
ENSMUSG00000030494	69.6686	0.637727	0.308383	2.06797	0.0386429	0.999962	Rhpn2
ENSMUSG00000038301	859.71	0.334268	0.161666	2.06765	0.038673	0.999962	Snx10
ENSMUSG00000027603	121.915	0.60173	0.291097	2.06711	0.0387234	0.999962	Ggt7
ENSMUSG00000038039	1722.42	-0.227011	0.109822	-2.06708	0.0387269	0.999962	Gcc2
ENSMUSG00000072774	308.208	0.328811	0.159077	2.06699	0.0387353	0.999962	Zfp951
ENSMUSG00000035775	4.37705	3.49843	1.69286	2.06658	0.0387741	0.999962	Krt20
ENSMUSG00000063415	305.101	-1.93263	0.935683	-2.06548	0.0388779	0.999962	Cyp26b1
ENSMUSG00000038965	4681.8	-0.187444	0.0908013	-2.06433	0.0389865	0.999962	Ube2l3
ENSMUSG00000024235	126.059	0.492672	0.23878	2.06329	0.0390854	0.999962	Map3k8
ENSMUSG00000025932	430.006	0.465498	0.225727	2.06221	0.0391874	0.999962	Eya1
ENSMUSG00000030994	148.695	0.602723	0.292496	2.06062	0.0393396	0.999962	D7Ertd443e
ENSMUSG00000019889	928.407	-0.265894	0.129103	-2.05955	0.0394416	0.999962	Ptprk
ENSMUSG00000059423	1784.19	-0.256499	0.124543	-2.05951	0.039445	0.999962	Zfp933
ENSMUSG00000024978	8542.08	-0.439232	0.213283	-2.05939	0.0394573	0.999962	Gpam
ENSMUSG00000040552	534.287	0.470328	0.228396	2.05927	0.0394687	0.999962	C3ar1
ENSMUSG00000070814	285.354	-0.439229	0.213415	-2.05809	0.0395811	0.999962	Zswim9
ENSMUSG00000094081	29.6458	1.16827	0.568329	2.05563	0.0398184	0.999962	Gm20826
ENSMUSG00000112938	1.72734	-4.63949	2.25763	-2.05502	0.0398769	0.999962	NA
ENSMUSG00000004328	169.929	0.681855	0.332017	2.05368	0.0400072	0.999962	Hif3a
ENSMUSG00000101111	87013.5	-0.288488	0.140531	-2.05284	0.0400885	0.999962	NA
ENSMUSG00000024621	1386.64	0.299443	0.145869	2.05283	0.0400891	0.999962	Csf1r
ENSMUSG00000039512	1258.62	-0.274592	0.133794	-2.05235	0.0401353	0.999962	Uhrf1bp1
ENSMUSG00000073421	3148.58	0.34166	0.166521	2.05176	0.0401932	0.999962	H2-Ab1
ENSMUSG00000021597	384.627	-0.361161	0.176029	-2.05171	0.0401977	0.999962	Slf1
ENSMUSG00000027655	344.383	0.404829	0.197331	2.05152	0.0402165	0.999962	Dhx35
ENSMUSG00000028861	327.965	-0.415722	0.202672	-2.05121	0.0402468	0.999962	Mrps15
ENSMUSG00000019929	3849.75	0.442791	0.215939	2.05054	0.0403117	0.999962	Dcn
ENSMUSG00000005251	32.2752	0.963681	0.470242	2.04933	0.0404299	0.999962	Ripk4
ENSMUSG00000024910	40.3814	0.941625	0.459897	2.04747	0.0406121	0.999962	Ctsw
ENSMUSG00000026207	446.236	0.313937	0.153335	2.04739	0.0406197	0.999962	Speg
ENSMUSG00000026896	1135.79	-0.266229	0.130035	-2.04737	0.0406219	0.999962	Ifih1
ENSMUSG00000078869	23.1997	-1.12572	0.5504	-2.04528	0.040827	0.999962	NA
ENSMUSG00000020085	4521.54	-0.401176	0.196416	-2.04248	0.0411038	0.999962	Aifm2
ENSMUSG00000044098	1107.5	0.267866	0.131272	2.04054	0.0412964	0.999962	Rsbn1
ENSMUSG00000048915	638.293	-0.387826	0.190076	-2.04038	0.0413129	0.999962	Efna5
ENSMUSG00000063903	8.12847	-1.91531	0.93892	-2.03991	0.0413593	0.999962	Klk1
ENSMUSG00000095648	116.409	-0.631788	0.309854	-2.03899	0.0414515	0.999962	Gm2004
ENSMUSG00000060470	89.5506	0.622842	0.305639	2.03784	0.0415664	0.999962	Adgrg3
ENSMUSG00000044005	22.6123	1.32332	0.649486	2.03748	0.0416018	0.999962	Gls2
ENSMUSG00000095325	360.048	-0.445517	0.218742	-2.03672	0.041678	0.999962	Zfp870
ENSMUSG00000008333	366.356	-0.36085	0.177287	-2.0354	0.0418107	0.999962	Snrpb2
ENSMUSG00000033060	515.723	-0.31596	0.155234	-2.03538	0.041813	0.999962	Lmo7
ENSMUSG00000052760	31.4161	1.1104	0.545798	2.03444	0.0419068	0.999962	A630001G21Rik
ENSMUSG00000048967	5.18707	2.89409	1.42358	2.03297	0.0420556	0.999962	Yjefn3
ENSMUSG00000028413	4515.48	-0.224282	0.110324	-2.03294	0.0420588	0.999962	B4galt1
ENSMUSG00000057207	118.993	0.547325	0.269306	2.03236	0.0421176	0.999962	Olfr1028
ENSMUSG00000061702	12.7339	1.84853	0.909683	2.03207	0.0421471	0.999962	Tmem91
ENSMUSG00000090553	322.756	-0.381515	0.18791	-2.03031	0.0423247	0.999962	Snrpe
ENSMUSG00000048911	378.772	0.341763	0.168349	2.03009	0.0423474	0.999962	Rnf24
ENSMUSG00000055026	1125.11	-0.520973	0.256672	-2.02972	0.0423847	0.999962	Gabrg3
ENSMUSG00000022575	187.688	0.472235	0.232691	2.02945	0.0424122	0.999962	Gsdmd
ENSMUSG00000033059	1563.56	0.264383	0.130305	2.02896	0.0424622	0.999962	Pygb
ENSMUSG00000030987	1836.98	0.207862	0.102454	2.02882	0.0424763	0.999962	Stim1
ENSMUSG00000036291	956.832	-0.300182	0.14801	-2.02811	0.0425487	0.999962	Ap5m1
ENSMUSG00000032394	46.1014	0.836141	0.412399	2.0275	0.0426109	0.999962	Igdcc3
ENSMUSG00000029513	950.974	-0.286203	0.141189	-2.02709	0.0426529	0.999962	Prkab1
ENSMUSG00000058254	1628.1	0.295795	0.145927	2.02701	0.0426616	0.999962	Tspan7
ENSMUSG00000070426	502.489	-0.321867	0.158808	-2.02677	0.0426859	0.999962	Rnf121
ENSMUSG00000028910	438.187	-0.346602	0.171029	-2.02656	0.042707	0.999962	Mecr
ENSMUSG00000031360	1027.04	-0.254285	0.125493	-2.0263	0.0427341	0.999962	Ctps2
ENSMUSG00000030681	2526.68	-0.252626	0.124725	-2.02547	0.0428188	0.999962	Mvp
ENSMUSG00000039706	537.861	0.333494	0.164681	2.0251	0.0428572	0.999962	Ldb2
ENSMUSG00000060487	1509.87	-0.468269	0.231252	-2.02493	0.0428744	0.999962	Samd5
ENSMUSG00000024330	17.0599	1.5861	0.783837	2.02351	0.0430204	0.999962	Col11a2
ENSMUSG00000063787	337.514	-0.361373	0.178641	-2.02291	0.0430828	0.999962	Chchd1
ENSMUSG00000062128	4.69074	-3.76209	1.85992	-2.02272	0.0431019	0.999962	Olfr20
ENSMUSG00000014504	615.67	-0.318339	0.157497	-2.02123	0.0432555	0.999962	Srp19
ENSMUSG00000066026	1522.59	-0.32468	0.160651	-2.02102	0.0432774	0.999962	Dhrs3
ENSMUSG00000026500	250.672	-0.455514	0.225471	-2.02027	0.0433552	0.999962	Cox20
ENSMUSG00000090799	97.9275	0.655865	0.324642	2.02027	0.0433552	0.999962	Klhl33
ENSMUSG00000021669	7037.74	-0.30493	0.15103	-2.01899	0.0434879	0.999962	Cert1
ENSMUSG00000044791	3982.99	-0.267414	0.132521	-2.0179	0.0436021	0.999962	Setd2
ENSMUSG00000049336	32.3161	1.24299	0.61608	2.01758	0.0436348	0.999962	Tenm2
ENSMUSG00000049281	227.269	0.46369	0.229903	2.0169	0.0437064	0.999962	Scn3b
ENSMUSG00000042557	2110.7	-0.220924	0.109614	-2.01547	0.0438553	0.999962	Sin3a
ENSMUSG00000021670	1380.95	-0.4238	0.21038	-2.01445	0.0439626	0.999962	Hmgcr
ENSMUSG00000003617	3807.47	0.370189	0.183808	2.014	0.0440095	0.999962	Cp
ENSMUSG00000020436	96.6208	0.594104	0.294992	2.01397	0.0440131	0.999962	Gabrg2
ENSMUSG00000050132	193.018	0.454988	0.225927	2.01387	0.0440232	0.999962	Sarm1
ENSMUSG00000033623	1458.96	-0.319489	0.158827	-2.01155	0.0442677	0.999962	Pcgf3
ENSMUSG00000029634	1166.73	-0.293887	0.146182	-2.01042	0.044387	0.999962	Rnf6
ENSMUSG00000068299	893.616	-0.262107	0.130419	-2.00973	0.0444601	0.999962	Nat8f4
ENSMUSG00000031278	16631.4	-0.220158	0.10957	-2.00929	0.044506	0.999962	Acsl4
ENSMUSG00000047155	77.4887	0.602536	0.299902	2.00911	0.0445253	0.999962	Cyp4x1
ENSMUSG00000025995	677.36	0.310084	0.154342	2.00907	0.0445296	0.999962	Wdr75
ENSMUSG00000028851	1282.9	-0.321001	0.159783	-2.00898	0.0445394	0.999962	Nudc
ENSMUSG00000014158	63.4919	0.629812	0.313619	2.00821	0.0446213	0.999962	Trpv4
ENSMUSG00000020740	772.888	0.438561	0.218431	2.00778	0.0446671	0.999962	Gga3
ENSMUSG00000020776	1174.49	0.293594	0.146361	2.00595	0.0448613	0.999962	Fbf1
ENSMUSG00000030411	506.862	0.291535	0.145424	2.00473	0.0449924	0.999962	Nova2
ENSMUSG00000021213	195.83	-0.425327	0.212202	-2.00435	0.0450324	0.999962	Akr1c13
ENSMUSG00000073897	4.64534	2.60934	1.30211	2.00393	0.0450775	0.999962	Olfr17
ENSMUSG00000037989	279.539	0.523051	0.261022	2.00386	0.0450855	0.999962	Wnk2
ENSMUSG00000027082	1188.17	-0.310572	0.154998	-2.00372	0.0451	0.999962	Tfpi
ENSMUSG00000030790	365.053	0.45698	0.228203	2.00252	0.0452289	0.999962	Adm
ENSMUSG00000037605	246.558	0.382303	0.191092	2.00062	0.0454334	0.999962	Adgrl3
ENSMUSG00000024486	91.1332	-0.557026	0.278427	-2.00062	0.0454335	0.999962	Hbegf
ENSMUSG00000082902	2.87223	4.56095	2.28105	1.9995	0.0455546	0.999962	NA
ENSMUSG00000022270	2373.24	-0.29822	0.149205	-1.99873	0.0456378	0.999962	Retreg1
ENSMUSG00000095766	2.79946	-5.3336	2.67098	-1.99687	0.0458396	0.999962	NA
ENSMUSG00000056144	547.503	-0.296119	0.148355	-1.99601	0.0459327	0.999962	Trim34a
ENSMUSG00000026632	140.289	-0.459621	0.230338	-1.99542	0.0459966	0.999962	Tatdn3
ENSMUSG00000035246	65.4796	0.841375	0.421811	1.99468	0.0460783	0.999962	Pcyt1b
ENSMUSG00000021662	790.133	0.380878	0.191162	1.99243	0.046324	0.999962	Arhgef28
ENSMUSG00000087385	65.525	0.830439	0.416951	1.99169	0.0464047	0.999962	Frg2f1
ENSMUSG00000102037	12.3393	1.49811	0.752408	1.99109	0.0464714	0.999962	Bcl2a1a
ENSMUSG00000031872	147.883	0.675903	0.339512	1.9908	0.0465024	0.999962	Bean1
ENSMUSG00000034488	328.926	0.340445	0.171037	1.99048	0.046538	0.999962	Edil3
ENSMUSG00000021250	65.2067	0.902527	0.453496	1.99015	0.046574	0.999962	Fos
ENSMUSG00000032289	310.19	0.348989	0.175374	1.98997	0.0465944	0.999962	Thsd4
ENSMUSG00000030554	766.838	-0.263829	0.13266	-1.98876	0.0467278	0.999962	Synm
ENSMUSG00000025200	476.256	-0.436467	0.219574	-1.98779	0.046835	0.999962	Cwf19l1
ENSMUSG00000050840	10.4632	1.59153	0.80066	1.98777	0.0468368	0.999962	Cdh20
ENSMUSG00000035365	24.5894	-1.16749	0.587839	-1.98608	0.0470247	0.999962	Parpbp
ENSMUSG00000030357	3485.91	-0.272151	0.137184	-1.98384	0.0472731	0.999962	Fkbp4
ENSMUSG00000050578	97.0344	0.66075	0.333095	1.98367	0.0472928	0.999962	Mmp13
ENSMUSG00000026634	1139.93	0.278778	0.140569	1.98322	0.0473429	0.999962	Angel2
ENSMUSG00000037754	730.887	-0.266204	0.134267	-1.98265	0.0474061	0.999962	Ppp1r16b
ENSMUSG00000020709	263.775	0.404831	0.204209	1.98243	0.0474307	0.999962	Adap2
ENSMUSG00000033985	126.991	-0.607011	0.306209	-1.98234	0.047441	0.999962	Tesk2
ENSMUSG00000061353	1781.06	0.39974	0.201651	1.98234	0.0474413	0.999962	Cxcl12
ENSMUSG00000097993	33.2632	-1.67296	0.843956	-1.98229	0.0474468	0.999962	Ptprv
ENSMUSG00000051029	40.5931	-1.08943	0.549614	-1.98217	0.04746	0.999962	Serpinb1b
ENSMUSG00000075318	61.632	0.884451	0.446425	1.98119	0.0475705	0.999962	Scn2a
ENSMUSG00000021130	630.172	0.284639	0.143684	1.981	0.0475915	0.999962	Galnt16
ENSMUSG00000037210	1405.32	-0.23234	0.117286	-1.98097	0.0475947	0.999962	Fam193a
ENSMUSG00000074164	2.09665	-4.40038	2.22149	-1.98082	0.0476115	0.999962	Vmn2r-ps54
ENSMUSG00000093752	3114.42	-0.222539	0.112393	-1.98002	0.0477016	0.999962	NA
ENSMUSG00000083061	2.81703	4.54238	2.29434	1.97982	0.047724	0.999962	NA
ENSMUSG00000113902	886.169	-0.330586	0.167002	-1.97953	0.047756	0.999962	Ndufb1
ENSMUSG00000028433	1806.65	-0.254907	0.128832	-1.97859	0.0478617	0.999962	Ubap2
ENSMUSG00000071679	222.964	0.450744	0.22799	1.97704	0.0480373	0.999962	Rtl4
ENSMUSG00000038077	73.6262	0.745022	0.376954	1.97643	0.0481064	0.999962	Kcna6
ENSMUSG00000035177	2.45734	-4.37708	2.21491	-1.97619	0.0481328	0.999962	Nlrp2
ENSMUSG00000078566	3147.86	-0.276567	0.140032	-1.97502	0.0482655	0.999962	Bnip3
ENSMUSG00000026628	54.7005	1.04666	0.530015	1.97478	0.0482937	0.999962	Atf3
ENSMUSG00000030806	147.976	0.456449	0.23128	1.97358	0.0484298	0.999962	Stx1b
ENSMUSG00000104713	1061.88	-0.307097	0.155614	-1.97345	0.0484442	0.999962	Gbp6
ENSMUSG00000028634	606.975	0.402224	0.204052	1.97118	0.048703	0.999962	Hivep3
ENSMUSG00000021846	538.197	0.352893	0.179214	1.96912	0.0489391	0.999962	Peli2
ENSMUSG00000029915	47.6419	0.781398	0.396922	1.96864	0.0489939	0.999962	Clec5a
ENSMUSG00000022674	1044.74	-0.229443	0.116563	-1.9684	0.0490222	0.999962	Ube2v2
ENSMUSG00000049109	8.4768	1.93098	0.981129	1.96813	0.0490535	0.999962	Themis
ENSMUSG00000020220	8704.89	-0.28872	0.14677	-1.96716	0.0491651	0.999962	Vps13d
ENSMUSG00000004730	359.707	0.478126	0.243121	1.96662	0.049227	0.999962	Adgre1
ENSMUSG00000032827	3675.06	-0.22849	0.116207	-1.96624	0.0492712	0.999962	Ppp1r9a
ENSMUSG00000033777	291.741	0.583355	0.29674	1.96588	0.0493125	0.999962	Tlr13
ENSMUSG00000022587	7059.88	0.264936	0.134823	1.96506	0.049407	0.999962	Ly6e
ENSMUSG00000038179	179.168	0.618266	0.314631	1.96505	0.0494083	0.999962	Slamf7
ENSMUSG00000017390	295.507	0.347979	0.177101	1.96486	0.0494302	0.999962	Aldoc
ENSMUSG00000115293	2.64215	4.46724	2.27365	1.96479	0.0494388	0.999962	Gm49333
ENSMUSG00000091736	3.85106	5.00334	2.54708	1.96434	0.0494901	0.999962	Yy2
ENSMUSG00000038453	1191.43	0.340492	0.173363	1.96404	0.0495256	0.999962	Srcin1
ENSMUSG00000046949	1311.68	-0.294759	0.150151	-1.96308	0.0496374	0.999962	Nqo2
ENSMUSG00000038775	52.8596	0.851361	0.433825	1.96245	0.0497097	0.999962	Vill
ENSMUSG00000020048	15889.1	-0.191635	0.0976722	-1.96202	0.0497602	0.999962	Hsp90b1
ENSMUSG00000002799	172.361	0.620073	0.316083	1.96174	0.049793	0.999962	Jag2
ENSMUSG00000022636	3510.9	0.231213	0.117943	1.96038	0.0499515	0.999962	Alcam
ENSMUSG00000094910	572.57	0.30554	0.155862	1.96032	0.0499581	0.999962	D430019H16Rik
